# Supplementary material for: Impact of surgeon and anaesthesiologist sex on patient outcomes after cardiac surgery: a population-based study
Source: PubMed Central journal article supplement — BMJ Open. 2021 Aug 25;11(8):e051192. doi: 10.1136/bmjopen-2021-051192 (PMC8388286; doi:10.1136/bmjopen-2021-051192), 2021-08-25
Supplement: bmjopen-2021-051192.draft_revisions.pdf [file bmjopen-2021-051192.draft_revisions.pdf]

# BMJ Open

BMJ Open is committed to open peer review. As part of this commitment we make the peer review history of every article we publish publicly available.

When an article is published we post the peer reviewers' comments and the authors' responses online. We also post the versions of the paper that were used during peer review. These are the versions that the peer review comments apply to.

The versions of the paper that follow are the versions that were submitted during the peer review process. They are not the versions of record or the final published versions. They should not be cited or distributed as the published version of this manuscript.

BMJ Open is an open access journal and the full, final, typeset and author-corrected version of record of the manuscript is available on our site with no access controls, subscription charges or pay-per-view fees (<http://bmjopen.bmj.com>).

If you have any questions on BMJ Open's open peer review process please email [info.bmjopen@bmj.com](mailto:info.bmjopen@bmj.com)

# BMJ Open

## Impact of surgeon and anaesthesiologist sex on patient outcomes after cardiac surgery: a population-based study

|                               |                                                                                                                                                                                                                                                                                                                                                                                                                                                                                                                                                                                                                                                                                                                                                                                                                                |
|-------------------------------|--------------------------------------------------------------------------------------------------------------------------------------------------------------------------------------------------------------------------------------------------------------------------------------------------------------------------------------------------------------------------------------------------------------------------------------------------------------------------------------------------------------------------------------------------------------------------------------------------------------------------------------------------------------------------------------------------------------------------------------------------------------------------------------------------------------------------------|
| Journal:                      | <i>BMJ Open</i>                                                                                                                                                                                                                                                                                                                                                                                                                                                                                                                                                                                                                                                                                                                                                                                                                |
| Manuscript ID                 | bmjopen-2021-051192                                                                                                                                                                                                                                                                                                                                                                                                                                                                                                                                                                                                                                                                                                                                                                                                            |
| Article Type:                 | Original research                                                                                                                                                                                                                                                                                                                                                                                                                                                                                                                                                                                                                                                                                                                                                                                                              |
| Date Submitted by the Author: | 15-Mar-2021                                                                                                                                                                                                                                                                                                                                                                                                                                                                                                                                                                                                                                                                                                                                                                                                                    |
| Complete List of Authors:     | Sun, Louise; University of Ottawa Heart Institute, Division of Cardiac Anesthesiology; Institute for Clinical Evaluative Sciences<br>Boet, S; University of Ottawa Faculty of Medicine, Department of Anesthesiology and Pain Medicine; Ottawa Hospital Research Institute, Clinical Epidemiology Program<br>Chan, Vincent; University of Ottawa Heart Institute, Division of Cardiac Surgery<br>Lee, Douglas; Institute for Clinical Evaluative Sciences; University Health Network, Peter Munk Cardiac Centre<br>Mesana, Theiry; University of Ottawa Heart Institute<br>Etherington, Nicole; Ottawa Hospital Research Institute, Clinical Epidemiology Program; University of Ottawa Faculty of Medicine, Department of Anesthesiology and Pain Medicine<br>Bader Eddeen, Anan; Institute for Clinical Evaluative Sciences, |
| Keywords:                     | Cardiac surgery < SURGERY, Anaesthesia in cardiology < ANAESTHETICS, EPIDEMIOLOGY                                                                                                                                                                                                                                                                                                                                                                                                                                                                                                                                                                                                                                                                                                                                              |
|                               |                                                                                                                                                                                                                                                                                                                                                                                                                                                                                                                                                                                                                                                                                                                                                                                                                                |

SCHOLARONE™  
Manuscripts

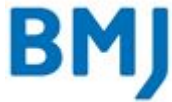

I, the Submitting Author has the right to grant and does grant on behalf of all authors of the Work (as defined in the below author licence), an exclusive licence and/or a non-exclusive licence for contributions from authors who are: i) UK Crown employees; ii) where BMJ has agreed a CC-BY licence shall apply, and/or iii) in accordance with the terms applicable for US Federal Government officers or employees acting as part of their official duties; on a worldwide, perpetual, irrevocable, royalty-free basis to BMJ Publishing Group Ltd ("BMJ") its licensees and where the relevant Journal is co-owned by BMJ to the co-owners of the Journal, to publish the Work in this journal and any other BMJ products and to exploit all rights, as set out in our [licence](#).

The Submitting Author accepts and understands that any supply made under these terms is made by BMJ to the Submitting Author unless you are acting as an employee on behalf of your employer or a postgraduate student of an affiliated institution which is paying any applicable article publishing charge ("APC") for Open Access articles. Where the Submitting Author wishes to make the Work available on an Open Access basis (and intends to pay the relevant APC), the terms of reuse of such Open Access shall be governed by a Creative Commons licence – details of these licences and which [Creative Commons](#) licence will apply to this Work are set out in our licence referred to above.

Other than as permitted in any relevant BMJ Author's Self Archiving Policies, I confirm this Work has not been accepted for publication elsewhere, is not being considered for publication elsewhere and does not duplicate material already published. I confirm all authors consent to publication of this Work and authorise the granting of this licence.

**Title:** Impact of surgeon and anaesthesiologist sex on patient outcomes after cardiac surgery: a population-based study

**Authors:**

Louise Y. Sun, MD, SM<sup>1,2,3,4,5</sup>

Sylvain Boet, MD, PhD<sup>4,5,6</sup>

Vincent Chan, MD, MPH<sup>7</sup>

Douglas S. Lee, MD, PhD<sup>2,8</sup>

Thierry G. Mesana, MD, PhD<sup>7</sup>

Anan Bader Eddeen, MSc<sup>2</sup>

Nicole Etherington, PhD<sup>4,5</sup>

<sup>1</sup>Division of Cardiac Anesthesiology, University of Ottawa Heart Institute

<sup>2</sup>Institute for Clinical Evaluative Sciences, Ontario, Canada

<sup>3</sup>School of Epidemiology and Public Health, University of Ottawa

<sup>4</sup>Department of Anesthesiology and Pain Medicine, Faculty of Medicine, University of Ottawa

<sup>5</sup>Clinical Epidemiology Program, Ottawa Hospital Research Institute

<sup>6</sup>Department of Innovation in Medical Education, Faculty of Medicine, University of Ottawa

<sup>7</sup>Division of Cardiac Surgery, University of Ottawa Heart Institute

<sup>8</sup>Peter Munk Cardiac Centre, University Health Network, University of Toronto

**Corresponding Author:**

Louise Sun, MD SM FRCPC FAHA

Clinician Scientist and Associate Professor

University of Ottawa Heart Institute, Rm H-2206, 40 Ruskin Street, Ottawa, Ontario, K1Y 4W7

Telephone: 613-696-7381 Email: lsun@ottawaheart.ca

**Manuscript word count:** 2813

**Running Title:** Physician sex and outcomes in cardiac surgery

**Keywords:** cardiac surgery, operating room, teamwork, surgeon, anaesthesiologist, sex, outcomes

## Abstract

**Background:** Physician sex may be especially influential in the cardiac operating room (COR) given the culmination of many stressors associated with implicit bias and a marked male predominance but has yet to be examined in this context.

**Objectives:** We sought to determine the association between cardiac physician team sex and patient outcomes.

**Design:** We performed a population-based, retrospective cohort study.

**Participants and Setting:** Adult patients who underwent CABG and/or aortic, mitral or tricuspid valve surgery between 2008 and 2018 in Ontario, Canada.

**Primary and Secondary Outcome Measures:** The primary outcome was all-cause 30-day mortality. Secondary outcomes included major adverse cardiovascular events (MACE) at 30-days and hospital and intensive care unit lengths of stay (LOS). Mixed effects logistic regression was used for categorical outcomes and Poisson regression for continuous outcomes.

**Results:** 79,862 patients underwent cardiac surgery by 98 surgeons (11.2% female) and 279 anaesthesiologists (23.3% female); 19,893 (24.9%) were treated by sex-discordant physician teams. Physician sex discordance was not associated with overall patient mortality or LOS; however, patients who underwent isolated CABG experienced longer hospital LOS when treated by an all-male physician team as compared to an all-female team. When examining the impact of individual physician sex, the length of hospital stay was longer when isolated CABG procedures were attended by a male surgeon or anaesthesiologist.

**Conclusions:** Patient outcomes and healthcare resource utilization after cardiac surgery may vary by sex concordance of the attending surgeon-anaesthesiologist team. Physician team sex diversity thus represents an important opportunity for closing existing practice gaps and optimizing patient outcome.

### Strengths and limitations of this study

- This study extends the analysis of physician sex to include the dynamic relationship of the cardiac surgeon and anaesthesiologist team.
- Our findings are quantitative and are limited by biases that are inherently present in observational studies.
- We were not able to consider physician gender, as gender variables were not present in the databases used.

## Introduction

Teamwork between anaesthesiologists and surgeons, who share leadership roles in the operating room (OR), is critical for full team performance and patient outcome, particularly during times of crisis.<sup>3-5</sup> Poor non-technical skills (e.g. communication, teamwork, leadership) are one of the main contributing factors to adverse events in surgery.<sup>6</sup> Incivility between the OR physician dyad has recently been demonstrated to impair anaesthesiologist performance and increase the likelihood of patient fatality during an operative crisis.<sup>5</sup> In the cardiac operating room (COR), where crisis situations are common, effective teamwork and communication between surgeons and anaesthesiologists may be even more important contributors to patient morbidity and mortality.<sup>7</sup>

While the quality of interactions between surgeons and anaesthesiologists may be driven by a variety of factors, emerging evidence suggests that sex (i.e. biological attributes) and gender (i.e. social constructed norms, roles, behaviors, expressions and identities) in particular warrant further investigation. In the broader realm of medical and surgical practice, physician sex and gender have been shown to influence physician practice patterns,<sup>8</sup> medical education,<sup>9</sup> assessment,<sup>10</sup> remuneration,<sup>11</sup> perceptions of safety culture,<sup>12</sup> burnout,<sup>13</sup> job satisfaction,<sup>13</sup> psychological well-being,<sup>13</sup> and patient outcomes.<sup>14 15</sup> In the high stakes setting of the COR, physician sex and gender may be especially influential given the culmination of many stressors associated with implicit bias<sup>16</sup> and a marked male predominance in comparison to other surgical specialties.<sup>17</sup>

Despite its potential importance to operative success and COR team-based culture, the association between surgeon and anaesthesiologist sex and patient outcomes has yet to be examined in this context. As a first step toward understanding the role of physician sex and gender in the COR, this study aimed to explore the association between physician sex discordance and patient outcomes after cardiac surgery. We hypothesized that better patient outcomes would be observed following cardiac surgery if cared for by COR teams comprised of a surgeon and anaesthesiologist of the same sex.

## Methods

The use of data in this project was authorized under section 45 of Ontario's *Personal Health Information Protection Act*, which does not require review by a Research Ethics Board. The dataset from this study is held securely in coded form at ICES (formerly the Institutes for Clinical Evaluative Sciences).<sup>18</sup> This study is reported in accordance to the STROBE checklist.<sup>19</sup>

### *Design Study Population*

We conducted a population-based, retrospective cohort study of Ontario residents 18 years of age or older, who underwent first-time index coronary artery bypass grafting (CABG), and/or aortic, mitral or tricuspid valve surgery between October 1, 2008 and December 31, 2018. Patient exclusion criteria were non-Ontario residency status, those with missing information regarding age and sex, and those who had concomitant arrhythmia, pulmonic valve or thoracic aorta surgery. In addition, patients treated by non-cardiac surgeons and those whose primary cardiac surgeon and/or anaesthesiologist could not be identified, were excluded. A flow diagram detailing the process used to select the study cohort is shown in Supplemental Figure 1.

### *Data Sources*

We used the clinical registry data from CorHealth Ontario and the population-level administrative healthcare databases from ICES. ICES is an independent, non-profit research institute whose legal status under Ontario's health information privacy law allows it to collect and analyze health care and demographic data, without consent, for health system evaluation and improvement. Ontario is Canada's most populous province with a publicly funded, universal health care system that reimburses all medically necessary services. CorHealth maintains a detailed prospective registry of all patients



1  
2  
3  
4  
5  
6  
7  
8  
9  
10  
11  
12  
13  
14  
15  
16  
17  
18  
19  
20  
21  
22  
23  
24  
25  
26  
27  
28  
29  
30  
31  
32  
33  
34  
35  
36  
37  
38  
39  
40  
41  
42  
43  
44  
45  
46  
47  
48  
49  
50  
51  
52  
53  
54  
55  
56  
57  
58  
59  
60

undergoing invasive cardiac procedures in Ontario from 20 advanced cardiac care hospitals. CorHealth demographic, comorbidity and procedural data has been validated through multiple chart audits.<sup>20</sup>

We deterministically linked the following administrative databases by using unique encoded identifier and analyzed them at ICES. Date and type of cardiac procedure from the CorHealth registry was linked with the ICES Physicians Database (physician demographics and clinical specialty), Canadian Institute for Health Information's Discharge Abstract Database (CIHI-DAD; comorbidities and hospital admissions), Ontario Health Insurance Plan (OHIP) database (physician service claims), Registered Persons Database (RPDB; vital statistics), and the Canadian census. These administrative databases have been validated for outcomes, exposures, and comorbidities, including heart failure (HF), chronic obstructive pulmonary disease (COPD), asthma, hypertension, myocardial infarction (MI) and diabetes.<sup>21-23</sup>

### *Patient and Procedure Characteristics*

Patient characteristics were identified from the CorHealth registry and supplemented with data from the CIHI-DAD and OHIP, using International Classification of Diseases (10<sup>th</sup> Revision; ICD-10-CA) codes within five years prior to the index procedure and according to validated algorithms.<sup>24 25</sup> We estimated each patient's socioeconomic status by using the neighborhood median income from the Canadian census<sup>26</sup> and determined residence status (rural versus urban) using Statistics Canada definitions.<sup>27</sup> Height, weight, and body mass index (BMI) were identified from the CorHealth Ontario registry and used to determine morbid obesity (defined as weight >159 kg or BMI  $\geq$ 40 kg/m<sup>2</sup>).<sup>28</sup> Frailty status was identified using the Johns Hopkins Adjusted Clinical Groups (ACG® System) frailty-defining diagnoses indicator, which is an instrument designed and validated for research of frailty-related outcomes and resource utilization using administrative data.<sup>29 30</sup>

1  
2  
3  
4  
5  
6  
7  
8  
9  
10  
11  
12  
13  
14  
15  
16  
17  
18  
19  
20  
21  
22  
23  
24  
25  
26  
27  
28  
29  
30  
31  
32  
33  
34  
35  
36  
37  
38  
39  
40  
41  
42  
43  
44  
45  
46  
47  
48  
49  
50  
51  
52  
53  
54  
55  
56  
57  
58  
59  
60

Emergent procedural status was ascertained using the CorHealth registry and supplemented by OHIP code E020C for emergent procedures.<sup>28 31</sup> We defined procedure complexity as simple (isolated CABG or single valve) vs. complex (multiple valves or combined valve(s) + CABG). Information on surgery duration was obtained from the CIHI-DAD.

### *Exposures*

The primary exposure was surgeon-anaesthesiologist sex discordance (i.e., surgeon and anaesthesiologist were of the opposite sex) vs. concordance (i.e., both treating physicians were of the same sex). Secondary exposures consisted of demographic characteristics of the primary surgeons and anaesthesiologists, including age, sex, years since medical school graduation, specialty, hospital, and total number of procedures performed since the inception of ICES databases in 1991 until the date of the index procedure.

### *Outcomes At 30 Days*

Outcomes were assessed from the date of the procedure until 30 days postoperatively. The primary outcome was all-cause mortality. Secondary outcomes were major adverse cardiovascular events (MACE; composite of stroke, repeat revascularization, hospitalization for MI and HF), and hospital and intensive care unit (ICU) lengths of stay (LOS).

### *Statistical Analysis*

L.Y.S. and A.B.E. had full access to all of the data in the study and take responsibility for its integrity and for the data analysis. Continuous variables were compared with a Student's t-test, or with a Wilcoxon rank-sum test for non-normally distributed data. Categorical variables were compared with a chi-square test. The association between physician sex discordance and patient outcomes was modeled

1  
2 using mixed effects logistic regression for categorical outcomes and Poisson regression for continuous  
3  
4 outcomes. In each of these models, the choice of surgeon, anaesthesiologist, and hospital were treated as  
5  
6 random intercepts and physician, patient and procedure characteristics were fixed effects. We tested for  
7  
8 potential effect modification by patient sex, procedure complexity, emergent operative status, and  
9  
10 hospital type (teaching vs. community) using multiplicative interaction terms.  
11  
12  
13  
14  
15

### 16 *Subgroup Analysis*

17  
18 Subgroup analyses were planned *a priori*. Surgeons who underwent subspecialized training (e.g.,  
19  
20 valvular repair) are more likely to excel in these procedures. However, CABG is a “bread and butter”  
21  
22 cardiac procedure in which reduced variations in surgical results are expected to occur. We therefore also  
23  
24 performed our analyses in patients who underwent isolated CABG.  
25  
26  
27  
28  
29

### 30 *Sensitivity Analyses*

31  
32 We repeated our multivariable analyses *first* by further classifying physician sex into male surgeon -  
33  
34 male anaesthesiologist, male surgeon - female anaesthesiologist, female surgeon - male  
35  
36 anaesthesiologist, and female surgeon - female anaesthesiologist. *Next*, we studied individually the  
37  
38 impact of surgeon and anaesthesiologist sex.  
39  
40  
41  
42  
43

44 Analyses were performed using SAS 9.4 (SAS Institute, USA) and R 3.5.3 (R Foundation, Austria).

45  
46 Statistical significance was defined as a two-sided P-value of  $< 0.05$ .  
47  
48  
49  
50

### 51 *Patient and Public Involvement*

52  
53 Patients and the public were not involved in the conduct of this research study.  
54  
55  
56  
57  
58  
59  
60

## Results

A total of 79,862 patients who underwent first-time cardiac surgery met our inclusion criteria (23.4% female). During the study period, surgeries were performed by 98 surgeons (11.2% female) and 279 anaesthesiologists (23.3% female), who formed 2,079 unique physician teams (3.0% both female, 67.6% both male, 9.0% female surgeon - male anaesthesiologist, 20.4% male surgeon - female anaesthesiologist). A total of 19,893 (24.9%) patients were treated by sex-discordant COR physician teams (7.2% by female surgeon - male anaesthesiologist, 17.7% male surgeon - female anaesthesiologist). In contrast, 1,188 (1.5%) patients were treated by all-female physician teams and 58,781 (73.6%) by all-male teams.

While most baseline patient characteristics were similar between those treated by sex discordant vs. concordant physicians (Table 1), those treated by sex discordant physicians were more likely to be morbidly obese, to undergo surgeries of longer duration, but were less likely to be frail. No clinically significant differences were observed in the characteristics of physicians who treated female vs. male patients (Table 2).

### *Mortality*

A total of 335 (1.7%) patients treated by sex discordant and 1,052 (1.8%) by sex concordant physicians died within 30 days of surgery ( $p=0.51$ , Table 3). The adjusted OR of 30-day mortality was 0.93 (95% CI 0.80-1.07) for sex discordant physicians, and none of the other physician characteristics were independent mortality risk factors (Table 4). The association of physician sex discordance and 30-day mortality was not modified by patient sex (interaction  $p=0.33$ ), complex surgery (interaction  $p=0.20$ ), emergent operative status (interaction  $p=0.92$ ), and hospital type (interaction  $p=0.92$ ).

1  
2  
3  
4  
5 A total of 205 (1.3%) patients who underwent isolated CABG patients by sex discordant and 654 (1.4%)  
6  
7 by sex concordant physicians died within 30 days of surgery ( $p=0.41$ , Supplemental Table 1). Physician  
8  
9 sex discordance was not associated with 30-day mortality (adjusted OR 0.88, 0.74 to 1.05, Supplemental  
10  
11 Table 2), and we did not observe a statistically significant interaction between physician sex discordance  
12  
13 and patient sex (interaction  $P=0.59$ ), off-pump CABG (interaction  $p=0.06$ ), emergent operative status  
14  
15 (interaction  $p=0.57$ ), and hospital type (interaction  $p=0.62$ ).  
16  
17  
18  
19  
20

### 21 *MACE*

22  
23 At 30 days, MACE occurred in 678 (3.4%) patients who were treated by sex discordant and 2,247 (3.7%)  
24  
25 by sex concordant physicians ( $p=0.03$ , Table 3). Neither physician sex discordance (adjusted OR 0.96  
26  
27 [0.87-1.06]), nor any other physician characteristics, were independently associated with MACE  
28  
29 (Supplemental Table 3). No modifiers of the association of physician sex discordance with MACE were  
30  
31 identified.  
32  
33  
34  
35  
36

37 In patients who underwent isolated CABG, 524 (3.3%) treated by sex discordant and 1,692 (3.6%) by  
38  
39 sex concordant physicians developed MACE ( $p=0.12$ , Supplemental Table 1). We did not observe a  
40  
41 statistically significant association between physician sex discordance and MACE (adjusted OR 0.99  
42  
43 [0.98-1.11], Supplemental Table 2), and no effect modifiers of the association between physician sex  
44  
45 discordance and MACE were identified.  
46  
47  
48  
49  
50

### 51 *ICU and Hospital LOS*

52  
53 Median ICU and hospital LOS were 2 (IQR, 2-3) and 7 (6-9), respectively, both in patients who were  
54  
55 treated by sex discordant and concordant physicians (Table 3). Physician sex discordance was not  
56  
57  
58  
59  
60

1  
2 associated with ICU or hospital LOS in the overall (Supplemental Table 4) nor the isolated CABG group  
3  
4 (Supplemental Table 2), and no effect modifiers were identified of the association between physician sex  
5  
6 discordance and ICU/hospital LOS.  
7  
8  
9

### 10 11 *Sensitivity Analyses*

#### 12 13 14 15 16 Surgeon-Anaesthesiologist Sex as a Four-Level Categorical Variable

17  
18 We did not observe an independent association between teams comprised of male surgeon - male  
19  
20 anaesthesiologist, male surgeon - female anaesthesiologist, female surgeon - male anaesthesiologist, and  
21  
22 female surgeon - female anaesthesiologist, and 30-day mortality, MACE, or ICU LOS (Supplemental  
23  
24 Table 5). However, an all-male physician team as compared to an all-female team was associated with  
25  
26 longer hospital LOS in CABG patients.  
27  
28  
29  
30  
31

#### 32 33 Individual Contribution of Surgeon and Anaesthesiologist Sex

34  
35 Male as compared to female surgeon, and male vs. female anaesthesiologist, was associated with longer  
36  
37 hospital LOS in the overall and CABG patient groups (Supplemental Table 5b).  
38  
39  
40  
41  
42  
43  
44  
45  
46  
47  
48  
49  
50  
51  
52  
53  
54  
55  
56  
57  
58  
59  
60

## Discussion

### *Key Findings*

The novelty of the present study lies in its consideration of the impact of surgeon-anaesthesiologist dyad on patient outcomes after cardiac surgery. Our key findings are as follows: 1) Physician sex discordance was not associated with overall patient mortality or LOS; 2) Patients who underwent isolated CABG experienced longer hospital LOS when treated by an all-male physician team as compared to an all-female team; 3) When examining the impact of individual physician sex, the length of hospital stay was longer when isolated CABG procedures were attended by a male surgeon or anaesthesiologist.

### *Interpretation*

We found that physician sex discordance was not associated with overall patient mortality or LOS. This stands contrary to our hypothesis as well as reports from other studies suggesting a greater opportunity for tension within sex discordant teams. For example, studies based on non-cardiac OR teams suggest female providers may more often be challenged and perceived negatively by others, and are less likely to speak up when an incorrect decision is made.<sup>8 32 33</sup> Teamwork behaviors such as cooperation, communication, and leadership, have also been observed to vary depending on the number of male and female providers in the room.<sup>8 33 34</sup> Our findings suggest that sex diversity in the COR may actually increase cooperation.<sup>34</sup> In fact, the COR teamwork culture may be changing in recent years, such that sex discordant surgeon-anaesthesiologist pairs are working more effectively together in achieving the observed lower rates of mortality. Further research is needed to qualitatively determine the relevance of this finding to teamwork quality and physician performance.

1  
2  
3 While previous studies have investigated the role of physician sex individually for surgeons,<sup>14</sup> and  
4 primary care practitioners,<sup>35</sup> we extended this analysis to include the dynamic relationship of the cardiac  
5 surgeon and anaesthesiologist team. A recent study of 25 cardiac and non-cardiac procedure types  
6 performed in Ontario, found that patients treated by female surgeons compared to male surgeons had a  
7 lower 30-day mortality (adjusted odds ratio 0.88; 95% CI: 0.79-0.99, P=0.04).<sup>14</sup> These authors  
8 postulated, however, that better outcomes in the hands of female surgeons may have been confounded  
9 by a higher volume of non-emergent, non-complex procedures being performed by this group. Our  
10 subgroup analysis in patients who underwent CABG, a routine procedure, was aimed to overcome this  
11 case allocation bias. We observed longer lengths of hospital stay in those treated by all-male surgeon-  
12 anaesthesiologist teams as compared to all-female teams, as well as individually by male  
13 anaesthesiologists and surgeons. Though researchers have postulated a variety of reasons for better  
14 patient outcomes among female surgeons<sup>14 15</sup> and primary care physicians,<sup>35</sup> less work has been done to  
15 examine how sex and gender may influence anaesthesia practice or team-based work in the COR. Our  
16 findings may in part be explained by greater adherence to practice guidelines by female surgeons and  
17 anaesthesiologists, as well as their propensity for more effective interprofessional teamwork, and more  
18 active engagement in patient-centered care.<sup>36 37</sup>

19  
20  
21  
22  
23  
24  
25  
26  
27  
28  
29  
30  
31  
32  
33  
34  
35  
36  
37  
38  
39  
40  
41 The performance of female physicians has also been framed in terms of the challenges they must often  
42 overcome to practice effectively in the surgical specialties. For example, Wallis and colleagues suggested  
43 that it is possible that “these barriers might create a higher standard for women to gain entrance into the  
44 surgical workforce than men, resulting in the selection of a cohort of women that are proportionately  
45 more skilled, motivated, and harder working”.<sup>14</sup> This may be particularly true of cardiac surgery given it  
46 is amongst the most demanding specialties and is traditionally viewed as a male dominated field. Still,  
47 studies regarding medical emergencies outside of the COR setting have found that male healthcare  
48  
49  
50  
51  
52  
53  
54  
55  
56  
57  
58  
59  
60



1  
2 professionals outperform their female colleagues, albeit at least in part because women's leadership is  
3 more likely to be challenged.<sup>8 33</sup> Consequently, more research is needed to determine when and how to  
4 best support male and female physicians to promote effective practice and equity in the COR. As more  
5 women continue to pursue cardiac surgery and anesthesiology, it will be important for research to deep-  
6 dive into their performance and experiences; this includes the impact of diversity on COR teamwork.  
7  
8  
9  
10  
11  
12  
13  
14  
15

### 16 *Limitations*

17  
18 *Firstly*, an important limitation of our study is that we were only able to examine the impact of sex as  
19 gender variables were not available in the databases used. In the future, organizations may wish to  
20 consider incorporating measures of gender as routinely collected elements. *Secondly*, our findings are  
21 quantitative, and are limited by the inherent biases of observational studies. Prospective, qualitative  
22 research is warranted to further explore the role of physician sex and gender in the COR along with other  
23 potentially important factors such as ethnicity, language, geographic location, country of medical  
24 education, and so forth.<sup>38 39</sup> *Thirdly*, our analyses were limited to physician characteristics as the  
25 characteristics of other COR providers were not available to us. Future research should consider the  
26 interaction of the surgeon and anaesthesiologist pair along with nurses, perfusionists, anaesthesia and  
27 surgical assistances, and trainees.  
28  
29  
30  
31  
32  
33  
34  
35  
36  
37  
38  
39  
40  
41  
42  
43

### 44 **Conclusions**

45  
46 Patient outcomes and healthcare resource utilization after cardiac surgery may vary by sex concordance  
47 of the attending surgeon-anaesthesiologist team. Our findings highlight the importance of physician team  
48 diversity, as well as the need for further studies to determine how sex, gender, and other  
49 sociodemographic traits of COR physicians and allied practitioners might intersect to influence processes  
50 of care and patient outcomes in this high-risk and resource intensive setting. We identified sex  
51  
52  
53  
54  
55  
56  
57  
58  
59  
60

1  
2  
3 composition of the COR physician team as a potential area for targeted education and training  
4  
5 interventions to close existing practice gaps and ensure the best outcome possible for patients.  
6  
7  
8  
9  
10  
11  
12  
13  
14  
15  
16  
17  
18  
19  
20  
21  
22  
23  
24  
25  
26  
27  
28  
29  
30  
31  
32  
33  
34  
35  
36  
37  
38  
39  
40  
41  
42  
43  
44  
45  
46  
47  
48  
49  
50  
51  
52  
53  
54  
55  
56  
57  
58  
59  
60

## **Funding Statement**

This study was supported by operating grants from the University of Ottawa Department of Anesthesiology and Pain Medicine (Grant #4772), and the ORACLE innovations fund of the University of Ottawa Heart Institute (UOHI) (Grant #4779). LYS was named National New Investigator by the Heart and Stroke Foundation of Canada and is supported by the Ottawa Heart Institute Research Corporation and a Tier 2 Clinical Research Chair in Big Data and Cardiovascular Outcomes at the University of Ottawa (Grant #s N/A). SB is supported by the Ottawa Hospital Anesthesia Alternate Funds Association (Grant # N/A). DSL is supported by a Mid-Career Investigator Award from the Heart and Stroke Foundation (Grant # N/A). TGM is supported by an endowed research chair at the UOHI (Grant # N/A). This study was supported by ICES, which is funded by an annual grant from the Ontario Ministry of Health (MOH) and the Ministry of Long-Term Care (MLTC) (Grant # N/A). Parts of this material are based on data and information compiled and provided by the Canadian Institute for Health Information (CIHI) (Grant # N/A). The authors acknowledge that the clinical registry data used in this analysis is from participating hospitals through CorHealth Ontario, which serves as an advisory body to the MOHLTC, is funded by the MOHLTC, and is dedicated to improving the quality, efficiency, access and equity in the delivery of the continuum of adult cardiac and stroke care in Ontario, Canada. In this project, frailty was identified using the Johns Hopkins ACG® System. The analyses, conclusions, opinions and statements expressed herein are solely those of the authors and do not reflect those of the funding or data sources; no endorsement is intended or should be inferred.

## **Declaration Of Interests**

The authors report no conflicts of interest.

## **Authors' Contribution**

1  
2  
3 The corresponding author attests that all listed authors meet authorship criteria and that no others meeting  
4  
5 the criteria have been omitted.  
6  
7

8 LYS, SB, VC, DSL, TGM, ABE, NE: Contributed substantially to conception and design, or analysis  
9  
10 and interpretation of data, drafted the article, revised article critically for important intellectual content,  
11  
12 gave final approval of the version to be published, agreed to act as guarantor of the work (ensuring that  
13  
14 questions related to any part of the work are appropriately investigated and resolved).  
15  
16

17  
18 The authors also acknowledge the usage of data compiled and provided by the Canadian Institute for  
19  
20 Health Information. These datasets were linked using unique encoded identifiers and analyzed at ICES.  
21  
22

23 The analyses, conclusions, opinions and statements expressed in the manuscript are those of the authors,  
24  
25 and do not necessarily reflect those of the above agencies.  
26  
27

### 28 29 **Data Sharing Statement** 30

31  
32 The dataset from this study is held securely in coded form at ICES. While legal data sharing agreements  
33  
34 between ICES and data providers (e.g., healthcare organizations and government) prohibit ICES from  
35  
36 making the dataset publicly available, access may be granted to those who meet pre-specified criteria for  
37  
38 confidential access, available at [www.ices.on.ca/DAS](http://www.ices.on.ca/DAS) (email: [das@ices.on.ca](mailto:das@ices.on.ca)). The full dataset creation  
39  
40 plan and underlying analytic code are available from the authors upon request, understanding that the  
41  
42 computer programs may rely upon coding templates or macros that are unique to ICES and are therefore  
43  
44 either inaccessible or may require modification.  
45  
46  
47  
48  
49  
50  
51  
52  
53  
54  
55  
56  
57  
58  
59  
60

**REFERENCES**

1. Park KY, Chaiet SR, Greenberg CC. Diversity and inclusion - one size does not fit all. *JAMA Surg* 2020;**155**:30–1.
2. Torres MB, Salles A, Cochran A. Recognizing and reacting to microaggressions in medicine and surgery. *JAMA Surg* 2019;154:868–72.
3. Cooper JB. Critical role of the surgeon-anesthesiologist relationship for patient safety. *Anesthesiology* 2018;**129**:402–5.
4. Attri JP, Sandhu GK, Mohan B, Bala N, Sandhu KS, Bansal L. Conflicts in operating room: Focus on causes and resolution. *Saudi J Anaesth* 2015;9:457.
5. Katz D, Blasius K, Isaak R, et al. Exposure to incivility hinders clinical performance in a simulated operative crisis. *BMJ Qual Saf* 2019;**28**:750–7.
6. Baker GR, Norton PG, Flintoft V, et al. The Canadian Adverse Events Study: the incidence of adverse events among hospital patients in Canada. *CMAJ* 2004;**170**:1678–86.
7. Schraagen JM, Schouten T, Smit M, et al. Assessing and improving teamwork in cardiac surgery. *Qual Saf Health Care* 2010;**19**:e29.
8. Amacher SA, Schumacher C, Legeret C, et al. Influence of gender on the performance of cardiopulmonary rescue teams. *Crit Care Med* 2017;**45**:1.
9. Mueller AS, Jenkins TM, Osborne M, Dayal A, O'Connor DM, Arora VM. Gender differences in attending physicians' feedback to residents: a qualitative analysis. *J Grad Med Educ* 2017;**9**:577–85.
10. Dayal A, O'Connor DM, Qadri U, Arora VM. Comparison of male vs female resident milestone evaluations by faculty during emergency medicine residency training. *JAMA Intern Med* 2017;**177**:651–7.
11. Sarsons H. Interpreting signals in the labor market: evidence from medical referrals. *Job Market Paper* 2017.
12. Gambashidze N, Hammer A, Wagner A, et al. Influence of gender, profession, and managerial function on clinicians' perceptions of patient safety culture. *J Patient Saf* 2019.
13. Burns KEA, Fox-Robichaud A, Lorens E, Martin CM. Gender differences in career satisfaction, moral distress, and incivility: a national, cross-sectional survey of Canadian critical care physicians. *Can J Anesth* 2019;**66**:503–11.
14. Wallis CJ, Ravi B, Coburn N, Nam RK, Detsky AS, Satkunasivam R. Comparison of postoperative outcomes among patients treated by male and female surgeons: a population based matched cohort study. *BMJ* 2017;**359**.
15. Sharoky CE, Sellers MM, Keele LJ, et al. Does surgeon sex matter?: practice patterns and outcomes of female and male surgeons. *Ann Surg* 2017;**267**:1069–76.

16. Johnson T, Hickey R, Switzer G, et al. The impact of cognitive stressors in the emergency department on physician implicit racial bias. *Acad Emerg Med* 2016;**23**:297–305.
17. Canadian Medical Association. Cardiovascular/Thoracic Surgery Profile. 2018. Available from: <https://cma.ca/sites/default/files/2019-01/cardiothoracic-surgery-e.pdf> (Accessed 14 Jan 2021).
18. Victor JC, Monto AS, Surdina TY, et al. Hepatitis A vaccine versus immune globulin for postexposure prophylaxis. *N Engl J Med* 2007;**357**:1685–94.
19. Von Elm E, Altman DG, Egger M, Pocock SJ, Gøtzsche PC, Vandenbroucke JP. The Strengthening the Reporting of Observational Studies in Epidemiology (STROBE) statement: guidelines for reporting observational studies. *Ann Intern Med* 2007;**147**:573–7.
20. Tu J, Ko D, Guo H, et al. Determinants of variations in coronary revascularization practices. *CMAJ* 2012;**184**:179–86.
21. Tu K, Campbell NR, Chen Z-L, Cauch-Dudek KJ, McAlister FA. Accuracy of administrative databases in identifying patients with hypertension. *Open Med* 2007;**1**:e18-26.
22. Juurlink D, Preyra C, Croxford R, Chong A, Austin P, Tu J LA. Canadian institute for health information discharge abstract database: a validation study. 2006
23. Hux JE, Ivis F, Flintoft V, Bica A. Diabetes in Ontario: determination of prevalence and incidence using a validated administrative data algorithm. *Diabetes Care* 2002;**25**:512–6.
24. Gershon AS, Wang C, Guan J, Vasilevska-Ristovska J, Cicutto L, To T. Identifying patients with physician-diagnosed asthma in health administrative databases. *Can Respir J* 2009;**16**:183–8.
25. Schultz SE, Rothwell DM, Chen Z, Tu K. Identifying cases of congestive heart failure from administrative data: a validation study using primary care patient records. *Chronic Dis Inj Can* 2013;**33**:160–6.
26. Health Analytics Branch, Ontario Ministry of Health and Long-Term Care. *Health Analyst's Toolkit*. 2012.
27. du Plessis V, Beshiri R, Bollman R, Clemenson H. Definitions of “Rural” *Agricultural and Rural Working Paper Series* No. 61. 2002. Ottawa: Statistics Canada Agriculture Division.
28. Sun LY, Tu J V., Eddeen AB, Liu PP. Prevalence and long-term survival after coronary artery bypass grafting in women and men with heart failure and preserved versus reduced ejection fraction. *J Am Heart Assoc* 2018;**7**:1–14.
29. Lieberman A, Weiner J. Development and evaluation of the Johns Hopkins University risk adjustment models for Medicare+Choice plan payment | Johns Hopkins ACG® System. Baltimore, MD; 2003
30. Sternberg SA, Bentur N, Abrams C, et al. Identifying frail older people using predictive modeling. *Am J Manag Care* 2012;**18**:e392-7.

- 1
- 2
- 3 31. Tran DTT, Tu J V, Dupuis J-Y, Bader Eddeen A, Sun LY. Association of frailty and long-term
- 4 survival in patients undergoing coronary artery bypass grafting. *J Am Heart Assoc*
- 5 2018;**7**:e009882.
- 6
- 7 32. Corsini EM, Luc JGY, Mitchell KG, Turner NS, Vaporciyan AA, Antonoff MB. Predictors of
- 8 the response of operating room personnel to surgeon behaviors. *Surg Today* 2019;**49**:927–35.
- 9
- 10 33. Pattni N, Bould MD, Hayter MA, et al. Gender, power and leadership: the effect of a superior's
- 11 gender on respiratory therapists' ability to challenge leadership during a life-threatening
- 12 emergency. *BJA Br J Anaesth* 2017;**119**:697–702.
- 13
- 14 34. Jones LK, Jennings BM, Higgins MK, de Waal FBM. Ethological observations of social
- 15 behavior in the operating room. *Proc Natl Acad Sci* 2018;**115**:7575–80.
- 16
- 17 35. Tsugawa Y, Jena AB, Figueroa JF, Orav EJ, Blumenthal DM, Jha AK. Comparison of hospital
- 18 mortality and readmission rates for medicare patients treated by male vs female physicians.
- 19 *JAMA Intern Med* 2017;**117**:206–13.
- 20
- 21 36. Thomas W. Teaching and assessing surgical competence. *Ann R Coll Surg Engl* 2006;**88**:429–
- 22 32.
- 23
- 24 37. Birkmeyer NJO, Finks JF, Greenberg CK, et al. Safety culture and complications after bariatric
- 25 surgery. *Ann Surg* 2013;**257**:260–5.
- 26
- 27 38. McCall L. The complexity of intersectionality. *J Women Cult Soc* 2005;**30**: 1771–800.
- 28
- 29 39. Crenshaw K. Mapping the margins: Intersectionality, identity politics, and violence against
- 30 women of color. *Stanford Law Rev* 1993;**43**:1241–99.
- 31
- 32
- 33
- 34
- 35
- 36
- 37
- 38
- 39
- 40
- 41
- 42
- 43
- 44
- 45
- 46
- 47
- 48
- 49
- 50
- 51
- 52
- 53
- 54
- 55
- 56
- 57
- 58
- 59
- 60

## TABLES

Table 1. Patient characteristics by surgeon-anaesthesiologist sex discordance in all cardiac surgery patients.

| Variable                                     | Discordant<br>(n=19,893) | Concordant<br>(n=59,969) | Standardized<br>Difference | P-value |
|----------------------------------------------|--------------------------|--------------------------|----------------------------|---------|
| Age, mean ± SD, yr                           | 66.3 ± 10.4              | 66.4 ± 10.4              | 0                          | 0.76    |
| Female Sex, n (%)                            | 4,678 (23.5)             | 14,010 (23.4)            | 0                          | 0.66    |
| Income Quintile, n (%)                       |                          |                          |                            |         |
| 1                                            | 3,762 (18.9)             | 11,771 (19.6)            | 0.02                       | 0.01    |
| 2                                            | 3,966 (19.9)             | 12,374 (20.6)            | 0.02                       |         |
| 3                                            | 4,162 (20.9)             | 12,226 (20.4)            | 0.01                       |         |
| 4                                            | 4,052 (20.4)             | 11,970 (20.0)            | 0.01                       |         |
| 5                                            | 3,951 (19.9)             | 11,628 (19.4)            | 0.01                       |         |
| Rural Residence, n (%)                       | 17,212 (86.5)            | 50,595 (84.4)            | 0.06                       | <0.001  |
| Hospital type, n (%)                         |                          |                          |                            |         |
| Community                                    | 6,236 (31.3)             | 18,104 (30.2)            | 0.03                       | 0.002   |
| Teaching                                     | 13,657 (68.7)            | 41,865 (69.8)            | 0.03                       |         |
| Hypertension, n (%)                          | 17,203 (86.5)            | 51,845 (86.5)            | 0                          | 0.93    |
| Atrial fibrillation, n (%)                   | 1,256 (6.3)              | 3,830 (6.4)              | 0                          | 0.72    |
| Recent MI within 30 days, n (%)              | 5,002 (25.1)             | 15,047 (25.1)            | 0                          | 0.88    |
| Remote MI, n (%)                             | 4,129 (20.8)             | 13,003 (21.7)            | 0.02                       | 0.006   |
| Previous PCI, n (%)                          | 3,048 (15.3)             | 9,161 (15.3)             | 0                          | 0.88    |
| Left ventricular ejection fraction, n (%)    |                          |                          |                            |         |
| ≥ 50                                         | 13,768 (69.2)            | 41,267 (68.8)            | 0.01                       | 0.37    |
| 35-49                                        | 4,257 (21.4)             | 12,841 (21.4)            | 0                          |         |
| 20-35                                        | 1,591 (8.0)              | 4,949 (8.3)              | 0.01                       |         |
| < 20                                         | 277 (1.4)                | 912 (1.5)                | 0.01                       |         |
| Heart failure, n (%)                         | 4,703 (23.6)             | 14,697 (24.5)            | 0.02                       | 0.01    |
| Peripheral arterial disease, n (%)           | 2,334 (11.7)             | 7,040 (11.7)             | 0                          | 0.98    |
| Cerebrovascular disease n (%)                | 1,952 (9.8)              | 5,887 (9.8)              | 0                          | 0.99    |
| Dementia, n (%)                              | 31 (0.2)                 | 132 (0.2)                | 0.01                       | 0.08    |
| Depression, n (%)                            | 300 (1.5)                | 814 (1.4)                | 0.01                       | 0.12    |
| Psychosis, n (%)                             | 31 (0.2)                 | 132 (0.2)                | 0.01                       | 0.08    |
| Smoking status, n (%)                        |                          |                          |                            |         |
| Never                                        | 8,759 (44.0)             | 26,942 (44.9)            | 0.02                       | 0.001   |
| Current                                      | 3,852 (19.4)             | 11,922 (19.9)            | 0.01                       |         |
| Former                                       | 7,282 (36.6)             | 21,105 (35.2)            | 0.03                       |         |
| Chronic obstructive pulmonary disease, n (%) | 5,705 (28.7)             | 17,303 (28.9)            | 0                          | 0.64    |
| Pulmonary circulation disorder, n (%)        | 387 (1.9)                | 1,195 (2.0)              | 0                          | 0.68    |
| Serum creatinine (µmol/L), n (%)             |                          |                          |                            |         |
| <120                                         | 17,529 (88.1)            | 52,151 (87.0)            | 0.03                       | <0.001  |
| 120-179                                      | 1,736 (8.7)              | 5,670 (9.5)              | 0.03                       |         |
| ≥180                                         | 628 (3.2)                | 2,148 (3.6)              | 0.02                       |         |
| Dialysis, n (%)                              | 384 (1.9)                | 1,298 (2.2)              | 0.02                       | 0.05    |
| Diabetes, n (%)                              | 8,994 (45.2)             | 27,182 (45.3)            | 0                          | 0.78    |
| Hypothyroidism, n (%)                        | 406 (2.0)                | 1,004 (1.7)              | 0.03                       | <0.001  |
| Morbid obesity, n (%)                        | 9,471 (47.6)             | 25,824 (43.1)            | 0.09                       | <0.001  |
| Primary cancer, n (%)                        | 980 (4.9)                | 2,928 (4.9)              | 0                          | 0.80    |
| Metastatic cancer, n (%)                     | 96 (0.5)                 | 285 (0.5)                | 0                          | 0.90    |
| Anemia, n (%)                                | 2,079 (10.5)             | 6,027 (10.1)             | 0.01                       | 0.11    |
| Venous thromboembolism, n (%)                | 82 (0.4)                 | 214 (0.4)                | 0.01                       | 0.27    |
| Liver disease, n (%)                         | 179 (0.9)                | 510 (0.9)                | 0.01                       | 0.51    |
| Alcohol abuse, n (%)                         | 303 (1.5)                | 835 (1.4)                | 0.01                       | 0.18    |



1  
2  
3  
4  
5  
6  
7  
8  
9  
10  
11  
12  
13  
14  
15  
16  
17  
18  
19  
20  
21  
22  
23  
24  
25  
26  
27  
28  
29  
30  
31  
32  
33  
34  
35  
36  
37  
38  
39  
40  
41  
42  
43  
44  
45  
46  
47  
48  
49  
50  
51  
52  
53  
54  
55  
56  
57  
58  
59  
60

|                                     |               |               |      |        |
|-------------------------------------|---------------|---------------|------|--------|
| Frailty, n (%)                      | 2,902 (14.6)  | 9,683 (16.1)  | 0.04 | <0.001 |
| Surgery type, n (%)                 |               |               |      |        |
| CABG                                | 15,672 (78.8) | 46,842 (78.1) | 0.02 | 0.05   |
| Single valve                        | 2,244 (11.3)  | 6,708 (11.2)  | 0    |        |
| Multiple valves                     | 283 (1.4)     | 923 (1.5)     | 0.01 |        |
| CABG + single valve                 | 1,583 (8.0)   | 5,122 (8.5)   | 0.02 |        |
| CABG + multiple valves              | 111 (0.6)     | 374 (0.6)     | 0.01 |        |
| Redo sternotomy, n (%)              | 460 (2.3)     | 1,695 (2.8)   | 0.03 | <0.001 |
| Emergent surgery, n (%)             | 1,197 (6.0)   | 3,674 (6.1)   | 0    | 0.58   |
| Surgery duration, median (IQR), min | 273 (232-320) | 260 (220-307) | 0.2  | <0.001 |

Abbreviations: SD = standard deviation; MI = myocardial infarction; PCI = percutaneous coronary intervention; CABG = coronary artery bypass grafting; IQR = interquartile range

**Table 2. Physician characteristics by patient sex.**

| Variable                                       | Female patients<br>(n=18,688) | Male patients<br>(n=61,174) | Standardized<br>Difference | P-<br>value |
|------------------------------------------------|-------------------------------|-----------------------------|----------------------------|-------------|
| Surgeon age, mean ± SD, yr                     | 50.2 ± 8.8                    | 49.9 ± 8.8                  | 0.03                       | <0.001      |
| Surgeon experience, yr, n (%)                  |                               |                             |                            |             |
| <10                                            | 1,186 (6.3)                   | 4,153 (6.8)                 | 0.02                       | <0.001      |
| 11-20                                          | 4,791 (25.6)                  | 16,336 (26.7)               | 0.02                       |             |
| 21-30                                          | 7,144 (38.2)                  | 23,313 (38.1)               | 0                          |             |
| >30                                            | 5,567 (29.8)                  | 17,372 (28.4)               | 0.03                       |             |
| Surgeon volume, median (IQR), per yr           | 2,942 (1,209-<br>4,366)       | 2,842 (1,126-<br>4,322)     | 0.04                       | <0.001      |
| Anaesthesiologist age, mean ± SD, yr           | 48.3 ± 9.0                    | 48.3 ± 9.0                  | 0                          | 0.84        |
| Anaesthesiologist experience, yr, n (%)        |                               |                             |                            |             |
| 0-10                                           | 1,626 (8.7)                   | 5,563 (9.1)                 | 0.01                       | 0.04        |
| 11-20                                          | 6,737 (36.0)                  | 21,877 (35.8)               | 0.01                       |             |
| 21-30                                          | 6,005 (32.1)                  | 19,171 (31.3)               | 0.02                       |             |
| >30                                            | 4,320 (23.1)                  | 14,563 (23.8)               | 0.02                       |             |
| Anaesthesiologist volume, median (IQR), per yr | 764 (368-1,311)               | 758 (366-1,318)             | 0.01                       | 0.54        |

Abbreviations: SD = standard deviation; PCI = percutaneous coronary intervention; IQR = interquartile range

**Table 3. Thirty-day patient outcomes by physician sex discordance.**

| <b>Variable</b>                             | <b>Discordant<br/>(n=19,893)</b> | <b>Concordant<br/>(n=59,969)</b> | <b>Standardized<br/>Difference</b> | <b>P-value</b> |
|---------------------------------------------|----------------------------------|----------------------------------|------------------------------------|----------------|
| Mortality, n (%)                            | 335 (1.7)                        | 1,052 (1.8)                      | 0.01                               | 0.51           |
| MACE, n (%)                                 | 678 (3.4)                        | 2,247 (3.7)                      | 0.02                               | 0.03           |
| Hospital length of stay, median (IQR), days | 7 (6-9)                          | 7 (6-9)                          | 0.03                               | <0.001         |
| ICU length of stay, median (IQR), days      | 2 (2-4)                          | 2 (2-4)                          | 0.06                               | <0.001         |

Abbreviations: MACE = major adverse cardiovascular events; ICU = intensive care unit, IQR = interquartile range

For peer review only

1  
2  
3  
4  
5  
6  
7  
8  
9  
10  
11  
12  
13  
14  
15  
16  
17  
18  
19  
20  
21  
22  
23  
24  
25  
26  
27  
28  
29  
30  
31  
32  
33  
34  
35  
36  
37  
38  
39  
40  
41  
42  
43  
44  
45  
46  
47

**Table 4. Predictors of all-cause patient mortality at 30 days, by surgeon-anaesthesiologist sex discordance.**

| Variable                                | Adjusted OR (95% CI) | P-value   |
|-----------------------------------------|----------------------|-----------|
| Physician characteristics               |                      |           |
| Physician sex discordance               | 0.93 (0.80-1.07)     | 0.30      |
| Surgeon experience, yr                  |                      |           |
| <10                                     | Reference            | Reference |
| 11-20                                   | 1.24 (0.93-1.66)     | 0.14      |
| 21-30                                   | 1.07 (0.76-1.51)     | 0.71      |
| >30                                     | 1.26 (0.83-1.91)     | 0.28      |
| Surgeon volume, per 100 cases           | 1.00 (0.99-1.01)     | 0.55      |
| Anaesthesiologist volume, per 100 cases | 1.00 (0.99-1.02)     | 0.79      |
| Anaesthesiologist experience, yr        |                      |           |
| <10                                     | Reference            | Reference |
| 11-20                                   | 1.15 (0.92-1.45)     | 0.22      |
| 21-30                                   | 1.01 (0.78-1.31)     | 0.93      |
| >30                                     | 1.03 (0.78-1.37)     | 0.82      |
| Patient characteristics                 |                      |           |
| Patient age, per 10 yr                  | 1.69 (1.57-1.80)     | <0.001    |
| Female patient sex                      | 1.56 (1.37-1.77)     | <0.001    |
| Income quintile                         |                      |           |
| 1                                       | 1.44 (1.20-1.73)     | <0.001    |
| 2                                       | 1.24 (1.03-1.48)     | 0.03      |
| 3                                       | 1.19 (0.99-1.44)     | 0.07      |
| 4                                       | 1.09 (0.90-1.33)     | 0.36      |
| 5                                       | Reference            | Reference |
| Rural residence                         | 0.95 (0.81-1.12)     | 0.57      |
| Community hospital                      | 1.24 (0.81-1.91)     | 0.33      |
| Hypertension                            | 1.01 (0.81-1.25)     | 0.95      |
| Atrial fibrillation                     | 1.14 (0.97-1.35)     | 0.11      |
| Recent MI within 30 days                | 1.39 (1.20-1.61)     | <0.001    |
| Remote MI                               | 1.24 (1.07-1.44)     | 0.006     |
| Previous PCI                            | 1.03 (0.88-1.21)     | 0.70      |
| Left ventricular ejection fraction      |                      |           |
| ≥ 50                                    | Reference            | Reference |
| 35-49                                   | 1.23 (1.07-1.42)     | 0.004     |
| 20-35                                   | 1.72 (1.46-2.04)     | <0.001    |
| < 20                                    | 2.52 (1.91-3.32)     | <0.001    |
| Heart failure                           | 1.90 (1.67-2.17)     | <0.001    |
| Peripheral arterial disease             | 1.45 (1.26-1.67)     | <0.001    |
| Cerebrovascular disease                 | 1.37 (1.19-1.59)     | <0.001    |
| Dementia                                | 2.46 (1.37-4.41)     | 0.003     |
| Depression                              | 0.97 (0.66-1.42)     | 0.86      |

1  
2  
3  
4  
5  
6  
7  
8  
9  
10  
11  
12  
13  
14  
15  
16  
17  
18  
19  
20  
21  
22  
23  
24  
25  
26  
27  
28  
29  
30  
31  
32  
33  
34  
35  
36  
37  
38  
39  
40  
41  
42  
43  
44  
45  
46  
47  
48  
49  
50  
51  
52  
53  
54  
55  
56  
57  
58  
59  
60

|                                        |                  |           |
|----------------------------------------|------------------|-----------|
| Psychosis                              | 1.42 (0.56-3.60) | 0.46      |
| Smoking status                         |                  |           |
| Never                                  | Reference        | Reference |
| Current                                | 1.01 (0.84-1.20) | 0.96      |
| Former                                 | 1.01 (0.89-1.15) | 0.87      |
| Chronic obstructive pulmonary disease  | 1.33 (1.18-1.49) | <0.001    |
| Pulmonary circulatory disorder         | 1.68 (1.33-2.13) | <0.001    |
| Serum creatinine ( $\mu\text{mol/L}$ ) |                  |           |
| <120                                   | Reference        | Reference |
| 120-179                                | 1.67 (1.44-1.94) | <0.001    |
| $\geq 180$                             | 2.78 (2.23-3.45) | <0.001    |
| Dialysis                               | 1.14 (0.86-1.50) | 0.37      |
| Diabetes                               | 0.96 (0.85-1.08) | 0.49      |
| Hypothyroidism                         | 0.75 (0.52-1.08) | 0.12      |
| Morbid obesity                         | 0.97 (0.86-1.09) | 0.61      |
| Primary cancer                         | 0.97 (0.77-1.22) | 0.81      |
| Metastatic cancer                      | 1.16 (0.59-2.31) | 0.66      |
| Anemia                                 | 1.25 (1.08-1.45) | 0.002     |
| Venous thromboembolism                 | 1.39 (0.80-2.44) | 0.25      |
| Liver disease                          | 1.45 (0.94-2.25) | 0.09      |
| Alcohol abuse                          | 1.21 (0.80-1.81) | 0.37      |
| Frailty                                | 0.82 (0.71-0.95) | 0.01      |
| Redo sternotomy                        | 1.10 (0.87-1.40) | 0.44      |
| Emergent surgery                       | 2.91 (2.49-3.39) | <0.001    |
| Complex surgery                        | 1.32 (1.14-1.53) | 0.0002    |
| Surgery duration, per 10 min           | 1.07 (1.07-1.08) | <0.001    |

Abbreviations: MI = myocardial infarction; PCI = percutaneous coronary intervention

Supplemental Figure 1. Cohort flow diagram

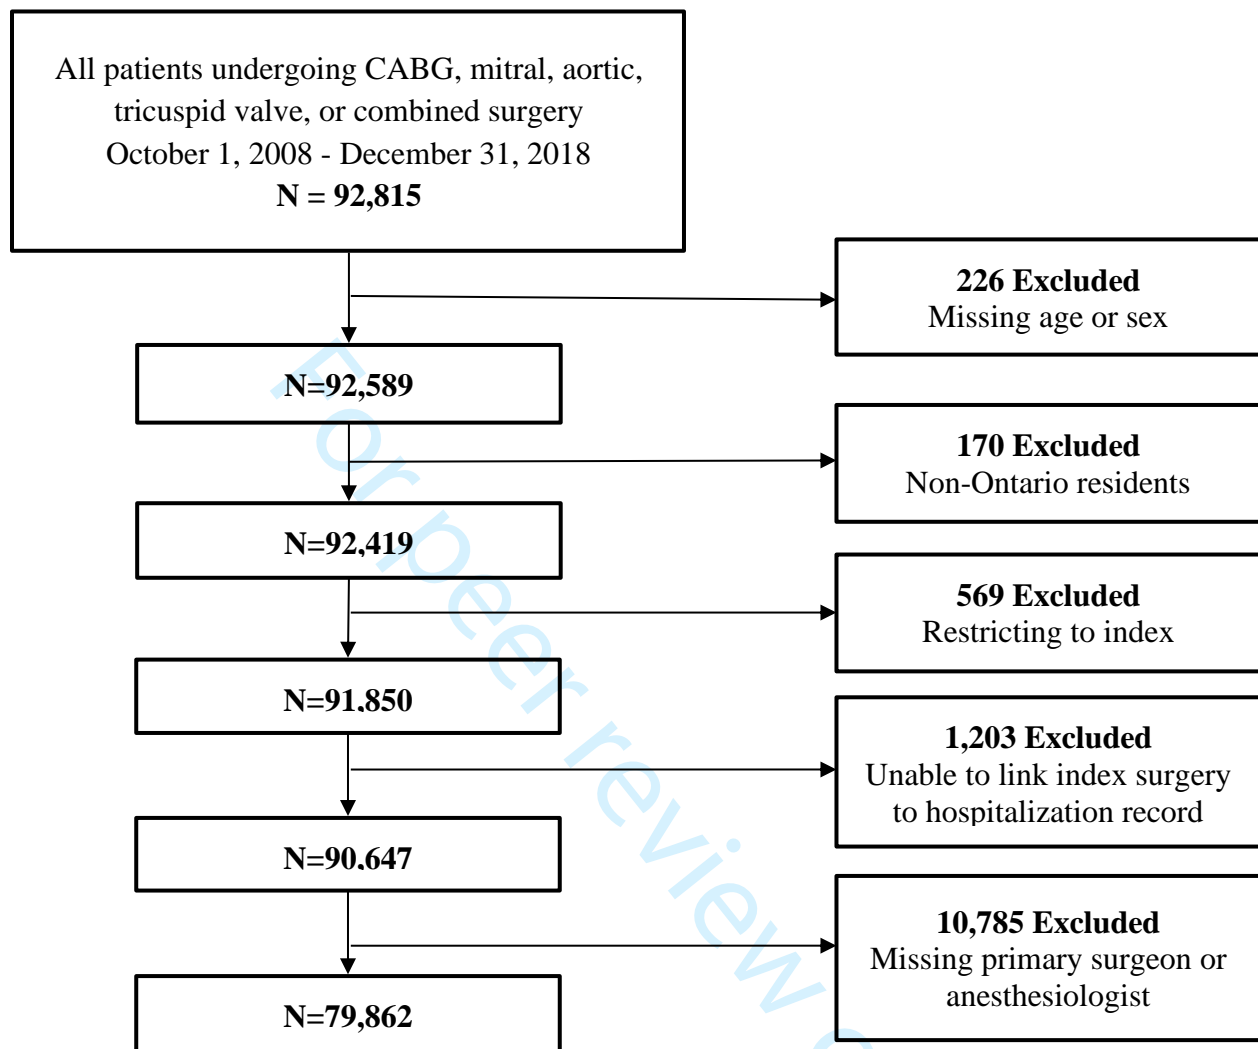

Abbreviation: CABG = coronary artery bypass surgery

**Supplemental Table 1. Thirty-day outcomes in patients who underwent CABG, by physician sex discordance.**

| Variable                                    | Discordant<br>(n=19,893) | Concordant<br>(n=59,969) | Standardized Difference | P-value |
|---------------------------------------------|--------------------------|--------------------------|-------------------------|---------|
| Mortality, n (%)                            | 205 (1.3)                | 654 (1.4)                | 0.01                    | 0.41    |
| MACE, n (%)                                 | 524 (3.3)                | 1,692 (3.6)              | 0.01                    | 0.12    |
| Hospital length of stay, median (IQR), days | 7 (6-9)                  | 7 (6-9)                  | 0.03                    | 0.007   |
| ICU length of stay, median (IQR), days      | 2 (2-3)                  | 2 (2-3)                  | 0.07                    | <0.001  |

Abbreviations: MACE = major adverse cardiovascular events; ICU = intensive care unit, IQR = interquartile range

**Supplemental Table 2. Adjusted associations between surgeon-anaesthesiologist sex discordance and CABG outcomes at 30 days.**

| <b>Outcome</b>          | <b>Adjusted measure (95% CI)</b> | <b>P-value</b> |
|-------------------------|----------------------------------|----------------|
| Mortality               | OR: 0.88 (0.74-1.05)             | 0.16           |
| MACE                    | OR: 0.99 (0.98-1.11)             | 0.40           |
| Hospital length of stay | RR: 1.00 (0.99-1.02)             | 0.70           |
| ICU length of stay      | RR: 0.99 (0.98-1.00)             | 0.09           |

Abbreviations: MACE = major adverse cardiovascular events; ICU = intensive care unit; OR = odds ratio; RR = risk ratio; CI = confidence interval

peer review only



**Supplemental Table 3. Predictors of major adverse cardiovascular events at 30 days in the overall cohort, by surgeon-anaesthesiologist sex discordance.**

| Variable                                  | Adjusted OR (95 CI) | P-value   |
|-------------------------------------------|---------------------|-----------|
| <b>Physician characteristics</b>          |                     |           |
| Physician sex discordance                 | 0.96 (0.87-1.06)    | 0.40      |
| <b>Surgeon experience, yr</b>             |                     |           |
| <10                                       | Reference           | Reference |
| 11-20                                     | 0.91 (0.76-1.10)    | 0.33      |
| 21-30                                     | 0.97 (0.77-1.22)    | 0.79      |
| >30                                       | 1.04 (0.78-1.37)    | 0.80      |
| Surgeon volume, per 100 cases             | 1.00 (1.00-1.01)    | 0.71      |
| Anaesthesiologist volume, per 100 cases   | 1.00 (0.99-1.01)    | 0.74      |
| <b>Anaesthesiologist experience, yr</b>   |                     |           |
| <10                                       | Reference           | Reference |
| 11-20                                     | 1.12 (0.97-1.31)    | 0.13      |
| 21-30                                     | 1.13 (0.95-1.33)    | 0.17      |
| >30                                       | 1.06 (0.87-1.28)    | 0.57      |
| <b>Patient characteristics</b>            |                     |           |
| Patient age, per 10 yr                    | 1.30 (1.25-1.36)    | <0.001    |
| Female patient sex                        | 1.45 (1.33-1.58)    | <0.001    |
| <b>Income quintile</b>                    |                     |           |
| 1                                         | 1.07 (0.95-1.21)    | 0.27      |
| 2                                         | 1.15 (1.02-1.30)    | 0.02      |
| 3                                         | 1.04 (0.92-1.17)    | 0.58      |
| 4                                         | 1.01 (0.89-1.14)    | 0.89      |
| 5                                         | Reference           | Reference |
| Rural residence                           | 0.99 (0.89-1.10)    | 0.83      |
| Community hospital                        | 0.79 (0.61-1.02)    | 0.08      |
| Hypertension                              | 1.12(0.97-1.28)     | 0.12      |
| Atrial fibrillation                       | 1.18 (1.04-1.34)    | 0.00      |
| Recent MI within 30 days                  | 1.98 (1.80-2.18)    | <0.001    |
| Remote MI                                 | 1.47 (1.32-1.63)    | <0.001    |
| Previous PCI                              | 0.93 (0.83-1.03)    | 0.16      |
| <b>Left ventricular ejection fraction</b> |                     |           |
| ≥ 50                                      | Reference           | Reference |
| 35-49                                     | 1.08 (0.98-1.19)    | 0.11      |
| 20-35                                     | 1.18 (1.04-1.34)    | 0.01      |
| < 20                                      | 1.10 (0.84-1.44)    | 0.49      |
| Heart failure                             | 1.42 (1.30-1.55)    | <0.001    |
| Peripheral arterial disease               | 1.32 (1.20-1.47)    | <0.001    |

|    |                                                                                     |                  |           |
|----|-------------------------------------------------------------------------------------|------------------|-----------|
| 1  |                                                                                     |                  |           |
| 2  |                                                                                     |                  |           |
| 3  |                                                                                     |                  |           |
| 4  | Cerebrovascular disease                                                             | 1.36 (1.22-1.51) | <0.001    |
| 5  | Dementia                                                                            | 1.05 (0.59-1.89) | 0.86      |
| 6  | Depression                                                                          | 1.20 (0.93-1.55) | 0.16      |
| 7  | Psychosis                                                                           | 0.87 (0.40-1.88) | 0.72      |
| 8  |                                                                                     |                  |           |
| 9  | Smoking status                                                                      |                  |           |
| 10 | Never                                                                               | Reference        | Reference |
| 11 | Current                                                                             | 1.05 (0.93-1.17) | 0.43      |
| 12 | Former                                                                              | 1.02 (0.93-1.11) | 0.73      |
| 13 |                                                                                     |                  |           |
| 14 | Chronic obstructive pulmonary disease                                               | 1.04 (0.95-1.12) | 0.41      |
| 15 | Pulmonary circulatory disorder                                                      | 1.22 (0.99-1.51) | 0.06      |
| 16 |                                                                                     |                  |           |
| 17 | Serum creatinine (µmol/L)                                                           |                  |           |
| 18 | <120                                                                                | Reference        | Reference |
| 19 | 120-179                                                                             | 1.16 (1.03-1.30) | 0.01      |
| 20 | ≥180                                                                                | 1.23 (1.01-1.49) | 0.04      |
| 21 |                                                                                     |                  |           |
| 22 | Dialysis                                                                            | 1.21 (0.95-1.55) | 0.12      |
| 23 | Diabetes                                                                            | 1.02 (0.94-1.10) | 0.65      |
| 24 | Hypothyroidism                                                                      | 0.95 (0.75-1.21) | 0.67      |
| 25 | Morbid obesity                                                                      | 1.12 (1.03-1.22) | 0.01      |
| 26 | Primary cancer                                                                      | 0.93 (0.79-1.10) | 0.40      |
| 27 | Metastatic cancer                                                                   | 1.02 (0.94-1.10) | 0.95      |
| 28 |                                                                                     |                  |           |
| 29 | Anemia                                                                              | 1.23 (1.10-1.37) | 0.0002    |
| 30 | Venous thromboembolism                                                              | 0.64 (0.35-1.17) | 0.15      |
| 31 | Liver disease                                                                       | 1.00 (0.69-1.44) | 0.10      |
| 32 | Alcohol abuse                                                                       | 1.28 (0.97-1.68) | 0.08      |
| 33 | Frailty                                                                             | 1.07 (0.97-1.18) | 0.17      |
| 34 | Redo sternotomy                                                                     | 1.44 (1.19-1.73) | 0.0001    |
| 35 | Emergent surgery                                                                    | 1.68 (1.48-1.90) | <0.001    |
| 36 | Complex surgery                                                                     | 1.17 (1.04-1.32) | 0.01      |
| 37 | Surgery duration, per 10 min                                                        | 1.02 (1.01-1.02) | <0.001    |
| 38 |                                                                                     |                  |           |
| 39 |                                                                                     |                  |           |
| 40 |                                                                                     |                  |           |
| 41 |                                                                                     |                  |           |
| 42 |                                                                                     |                  |           |
| 43 |                                                                                     |                  |           |
| 44 | Abbreviations: MI = myocardial infarction; PCI = percutaneous coronary intervention |                  |           |
| 45 |                                                                                     |                  |           |
| 46 |                                                                                     |                  |           |
| 47 |                                                                                     |                  |           |
| 48 |                                                                                     |                  |           |
| 49 |                                                                                     |                  |           |
| 50 |                                                                                     |                  |           |
| 51 |                                                                                     |                  |           |
| 52 |                                                                                     |                  |           |
| 53 |                                                                                     |                  |           |
| 54 |                                                                                     |                  |           |
| 55 |                                                                                     |                  |           |
| 56 |                                                                                     |                  |           |
| 57 |                                                                                     |                  |           |
| 58 |                                                                                     |                  |           |
| 59 |                                                                                     |                  |           |
| 60 |                                                                                     |                  |           |

**Supplemental Table 4a. Predictors of intensive care unit length of stay in the overall cohort, by surgeon-anaesthesiologist sex discordance.**

| Variable                                | Rate Ratio (95% CI) | P-value   |
|-----------------------------------------|---------------------|-----------|
| <b>Physician characteristics</b>        |                     |           |
| Physician sex discordance               | 0.99 (0.98-1.01)    | 0.52      |
| <b>Surgeon experience, yr</b>           |                     |           |
| <10                                     | Reference           | Reference |
| 11-20                                   | 0.99 (0.97-1.02)    | 0.65      |
| 21-30                                   | 1.02 (0.99-1.06)    | 0.14      |
| >30                                     | 1.02 (0.98-1.06)    | 0.24      |
| Surgeon volume, per 100 cases           | 1.00 (1.00-1.00)    | 0.33      |
| <b>Anaesthesiologist experience, yr</b> |                     |           |
| 0-10                                    | Reference           | Reference |
| 11-20                                   | 0.98 (0.96-1.00)    | 0.04      |
| 21-30                                   | 0.99 (0.97-1.02)    | 0.51      |
| >30                                     | 1.00 (0.97-1.03)    | 0.89      |
| Anaesthesiologist volume, per 100 cases | 1.00 (1.00-1.00)    | 0.71      |
| Surgery duration                        | 1.02 (1.02-1.02)    | <0.001    |
| <b>Patient characteristics</b>          |                     |           |
| Patient age, yr                         | 1.09 (1.08-1.09)    | <0.001    |
| Female patient sex                      | 1.07 (1.06-1.08)    | <0.001    |
| <b>Income quintile</b>                  |                     |           |
| 1                                       | 1.05 (1.04-1.07)    | <0.001    |
| 2                                       | 1.03 (1.02-1.04)    | <0.001    |
| 3                                       | 1.03 (1.02-1.04)    | <0.001    |
| 4                                       | 1.01 (1.00-1.02)    | 0.17      |
| 5                                       | Reference           | Reference |
| Rural residence                         | 0.98 (0.97-0.99)    | 0.00      |
| Community hospital                      | 0.98 (0.86-1.13)    | 0.82      |
| Hypertension                            | 0.96 (0.95-0.97)    | <0.001    |
| Atrial fibrillation                     | 1.06 (1.04-1.07)    | <0.001    |
| Recent MI within 30 days                | 1.02 (1.01-1.03)    | 0.00      |
| Remote MI                               | 1.00 (0.99-1.01)    | 0.69      |

|    |                                       |                  |           |
|----|---------------------------------------|------------------|-----------|
| 1  |                                       |                  |           |
| 2  |                                       |                  |           |
| 3  | Previous PCI                          | 1.00 (0.99-1.01) | 0.70      |
| 4  | Left ventricular ejection fraction    |                  |           |
| 5  | ≥ 50%                                 | Reference        | Reference |
| 6  | 35-49%                                | 1.03 (1.02-1.04) | <0.001    |
| 7  | 20-35%                                | 1.11 (1.10-1.13) | <0.001    |
| 8  | < 20%                                 | 1.21 (1.18-1.24) | <0.001    |
| 9  | Heart failure                         | 1.21 (1.20-1.22) | <0.001    |
| 10 | Peripheral arterial disease           | 1.05 (1.04-1.06) | <0.001    |
| 11 | Cerebrovascular disease               | 1.04 (1.03-1.05) | <0.001    |
| 12 | Dementia                              | 1.02 (0.95-1.09) | 0.54      |
| 13 | Depression                            | 1.18 (1.15-1.22) | <0.001    |
| 14 | Psychosis                             | 1.03 (0.96-1.11) | 0.39      |
| 15 | Smoking status                        |                  |           |
| 16 | Never                                 | Reference        | Reference |
| 17 | Current                               | 1.02 (1.01-1.03) | <0.001    |
| 18 | Former                                | 1.00 (0.99-1.01) | 1.00      |
| 19 | Chronic obstructive pulmonary disease | 1.05 (1.04-1.06) | <0.001    |
| 20 | Pulmonary circulatory disorder        | 1.23 (1.21-1.26) | <0.001    |
| 21 | Serum creatinine (µmol/L)             |                  |           |
| 22 | <120                                  | Reference        | Reference |
| 23 | 120-179                               | 1.16 (1.15-1.18) | <0.001    |
| 24 | ≥180                                  | 1.33 (1.31-1.36) | <0.001    |
| 25 | Dialysis                              | 1.06 (1.04-1.09) | <0.001    |
| 26 | Diabetes                              | 1.03 (1.02-1.03) | <0.001    |
| 27 | Hypothyroidism                        | 1.01 (0.98-1.03) | 0.60      |
| 28 | Morbid obesity                        | 0.99 (0.98-1.00) | 0.02      |
| 29 | Primary cancer                        | 1.00 (0.99-1.02) | 0.72      |
| 30 | Metastatic cancer                     | 0.99 (0.94-1.04) | 0.62      |
| 31 | Anemia                                | 1.15 (1.14-1.16) | <0.001    |
| 32 | Venous thromboembolism                | 0.94 (0.89-0.99) | 0.02      |
| 33 | Liver disease                         | 1.09 (1.05-1.12) | <0.001    |
| 34 | Alcohol abuse                         | 1.10 (1.07-1.14) | <0.001    |
| 35 | Frailty                               | 1.09 (1.08-1.10) | <0.001    |
| 36 | Complex surgery                       | 1.15 (1.14-1.17) | <0.001    |
| 37 |                                       |                  |           |
| 38 |                                       |                  |           |
| 39 |                                       |                  |           |
| 40 |                                       |                  |           |
| 41 |                                       |                  |           |
| 42 |                                       |                  |           |
| 43 |                                       |                  |           |
| 44 |                                       |                  |           |
| 45 |                                       |                  |           |
| 46 |                                       |                  |           |
| 47 |                                       |                  |           |

1  
2  
3  
4  
5  
6  
7  
8  
9  
10  
11  
12  
13  
14  
15  
16  
17  
18  
19  
20  
21  
22  
23  
24  
25  
26  
27  
28  
29  
30  
31  
32  
33  
34  
35  
36  
37  
38  
39  
40  
41  
42  
43  
44  
45  
46  
47

|                  |                  |        |
|------------------|------------------|--------|
| Redo sternotomy  | 0.97 (0.95-0.99) | 0.00   |
| Emergent surgery | 1.46 (1.44-1.48) | <0.001 |

Abbreviations: MI = myocardial infarction; PCI = percutaneous coronary intervention

For peer review only

**Supplemental Table 4b. Predictors of hospital length of stay in the overall cohort, by surgeon-anaesthesiologist sex discordance.**

| Variable                                | Rate Ratio (95% CI) | P-value   |
|-----------------------------------------|---------------------|-----------|
| Physician characteristics               |                     |           |
| Physician sex discordance               | 0.99 (0.98-1.00)    | 0.03      |
| Surgeon experience, yr                  |                     |           |
| <10                                     | Reference           | Reference |
| 11-20                                   | 0.99 (0.98-1.01)    | 0.35      |
| 21-30                                   | 1.01 (0.99-1.03)    | 0.41      |
| >30                                     | 1.01 (0.98-1.03)    | 0.65      |
| Surgeon volume, per 100 cases           | 1.00 (1.00-1.00)    | <.0001    |
| Anaesthesiologist experience, yr        |                     |           |
| 0-10                                    | Reference           | Reference |
| 11-20                                   | 0.99 (0.98-1.00)    | 0.03      |
| 21-30                                   | 0.98 (0.97-1.00)    | 0.03      |
| >30                                     | 0.97 (0.96-0.99)    | 0.00      |
| Anaesthesiologist volume, per 100 cases | 1.00 (1.00-1.00)    | 0.01      |
| Surgery duration                        | 1.01 (1.01-1.01)    | <.0001    |
| Patient characteristics                 |                     |           |
| Patient age, yr                         | 1.11 (1.10-1.11)    | <.0001    |
| Female patient sex                      | 1.11 (1.10-1.12)    | <.0001    |
| Income quintile                         |                     |           |
| 1                                       | 1.07 (1.06-1.08)    | <.0001    |
| 2                                       | 1.04 (1.03-1.04)    | <.0001    |
| 3                                       | 1.03 (1.02-1.03)    | <.0001    |
| 4                                       | 1.01 (1.01-1.02)    | 0.0002    |
| 5                                       | Reference           | Reference |
| Rural residence                         | 1.00 (0.99-1.00)    | 0.15      |
| Community hospital                      | 1.02 (0.92-1.12)    | 0.71      |
| Hypertension                            | 0.98 (0.97-0.99)    | <.0001    |
| Atrial fibrillation                     | 1.06 (1.05-1.07)    | <.0001    |
| Recent MI within 30 days                | 1.02 (1.02-1.03)    | <.0001    |
| Remote MI                               | 1.00 (0.99-1.01)    | 0.80      |
| Previous PCI                            | 0.97 (0.97-0.98)    | <.0001    |
| Left ventricular ejection fraction      |                     |           |
| ≥ 50%                                   | Reference           | Reference |
| 35-49%                                  | 1.02 (1.01-1.03)    | <.0001    |
| 20-35%                                  | 1.06 (1.05-1.06)    | <.0001    |
| < 20%                                   | 1.10 (1.08-1.12)    | <.0001    |
| Heart failure                           | 1.17 (1.16-1.18)    | <.0001    |
| Peripheral arterial disease             | 1.04 (1.04-1.05)    | <.0001    |
| Cerebrovascular disease                 | 1.06 (1.05-1.07)    | <.0001    |
| Dementia                                | 1.03 (0.99-1.08)    | 0.10      |

1  
2  
3  
4  
5  
6  
7  
8  
9  
10  
11  
12  
13  
14  
15  
16  
17  
18  
19  
20  
21  
22  
23  
24  
25  
26  
27  
28  
29  
30  
31  
32  
33  
34  
35  
36  
37  
38  
39  
40  
41  
42  
43  
44  
45  
46  
47  
48  
49  
50  
51  
52  
53  
54  
55  
56  
57  
58  
59  
60

|                                        |                  |           |
|----------------------------------------|------------------|-----------|
| Depression                             | 1.19 (1.17-1.21) | <.0001    |
| Psychosis                              | 1.22 (1.17-1.27) | <.0001    |
| Smoking status                         |                  |           |
| Never                                  | Reference        | Reference |
| Current                                | 1.00 (0.99-1.00) | 0.20      |
| Former                                 | 1.00 (0.99-1.00) | 0.63      |
| Chronic obstructive pulmonary disease  | 1.06 (1.05-1.06) | <.0001    |
| Pulmonary circulatory disorder         | 1.14 (1.13-1.16) | <.0001    |
| Serum creatinine ( $\mu\text{mol/L}$ ) |                  |           |
| <120                                   | Reference        | Reference |
| 120-179                                | 1.10 (1.09-1.11) | <.0001    |
| $\geq 180$                             | 1.25 (1.23-1.27) | <.0001    |
| Dialysis                               | 1.11 (1.09-1.13) | <.0001    |
| Diabetes                               | 1.03 (1.03-1.04) | <.0001    |
| Hypothyroidism                         | 1.01 (1.00-1.03) | 0.13      |
| Morbid obesity                         | 1.00 (0.99-1.00) | 0.29      |
| Primary cancer                         | 1.02 (1.01-1.03) | 0.0003    |
| Metastatic cancer                      | 1.00 (0.97-1.04) | 0.83      |
| Anemia                                 | 1.14 (1.13-1.15) | <.0001    |
| Venous thromboembolism                 | 1.01 (0.98-1.04) | 0.60      |
| Liver disease                          | 1.06 (1.04-1.09) | <.0001    |
| Alcohol abuse                          | 1.07 (1.05-1.09) | <.0001    |
| Frailty                                | 1.15 (1.14-1.16) | <.0001    |
| Complex surgery                        | 1.13 (1.12-1.13) | <.0001    |
| Redo sternotomy                        | 0.95 (0.94-0.96) | <.0001    |
| Emergent surgery                       | 1.22 (1.21-1.24) | <.0001    |

Abbreviations: MI = myocardial infarction; PCI = percutaneous coronary intervention

**Supplemental Table 5a. Sensitivity analysis of the association between physician sex and 30-day mortality and MACE in the overall cohort.**

| Physician Team                                                     | Mortality               |           | MACE                    |           |
|--------------------------------------------------------------------|-------------------------|-----------|-------------------------|-----------|
|                                                                    | Adjusted OR<br>(95% CI) | P-value   | Adjusted OR<br>(95% CI) | P-value   |
| <b>Model with physician sex as a 4-level categorical variable:</b> |                         |           |                         |           |
| Female surgeon + female anaesthesiologist                          | Reference               | Reference | Reference               | Reference |
| Male surgeon + male anaesthesiologist                              | 1.35 (0.77-2.37)        | 0.30      | 1.03 (0.72-1.47)        | 0.87      |
| Female surgeon + male anaesthesiologist                            | 1.20 (0.69-2.10)        | 0.52      | 0.86 (0.61-1.22)        | 0.41      |
| Male surgeon + female anaesthesiologist                            | 1.24 (0.69-2.20)        | 0.47      | 1.02 (0.71-1.46)        | 0.93      |
| <b>Model with surgeon sex only:</b>                                |                         |           |                         |           |
| Male surgeon                                                       | 1.15 (0.84-1.57)        | 0.38      | 1.16 (0.93-1.44)        | 0.19      |
| <b>Model with anaesthesiologist sex only:</b>                      |                         |           |                         |           |
| Male anaesthesiologist                                             | 1.10 (0.94-1.28)        | 0.23      | 1.00 (0.90-1.11)        | 0.97      |

Abbreviations: MACE = major adverse cardiovascular events



**Supplemental Table 5b. Sensitivity analysis of the association between physician sex and 30-day mortality and MACE in the CABG cohort.**

| Physician Team                                                     | Mortality               |           | MACE                    |           |
|--------------------------------------------------------------------|-------------------------|-----------|-------------------------|-----------|
|                                                                    | Adjusted OR<br>(95% CI) | P-value   | Adjusted OR<br>(95% CI) | P-value   |
| <b>Model with physician sex as a 4-level categorical variable:</b> |                         |           |                         |           |
| Female surgeon + female anaesthesiologist                          | Reference               | Reference | Reference               | Reference |
| Male surgeon + male anaesthesiologist                              | 1.31 (0.69-2.50)        | 0.41      | 0.92 (0.63-1.34)        | 0.66      |
| Female surgeon + male anaesthesiologist                            | 0.98 (0.50-1.91)        | 0.94      | 0.77 (0.52-1.13)        | 0.18      |
| Male surgeon + female anaesthesiologist                            | 1.20 (0.62-2.32)        | 0.59      | 0.96 (0.65-1.42)        | 0.84      |
| <b>Model with surgeon sex only:</b>                                |                         |           |                         |           |
| Male surgeon                                                       | 1.31 (0.94-1.18)        | 0.12      | 1.14 (0.91-1.44)        | 0.26      |
| <b>Model with anaesthesiologist sex only:</b>                      |                         |           |                         |           |
| Male anaesthesiologist                                             | 1.09 (0.90-1.31)        | 0.39      | 0.94 (0.83-1.06)        | 0.30      |

Abbreviations: MACE = major adverse cardiovascular events; CABG = coronary artery bypass grafting

**Supplemental Table 6a. Sensitivity analysis of the association between physician sex and lengths of stay in the overall cohort.**

| Physician Team                                                     | ICU Length of Stay     |           | Hospital Length of Stay |           |
|--------------------------------------------------------------------|------------------------|-----------|-------------------------|-----------|
|                                                                    | Rate Ratio<br>(95% CI) | P-value   | Rate Ratio<br>(95% CI)  | P-value   |
| <b>Model with physician sex as a 4-level categorical variable:</b> |                        |           |                         |           |
| Female surgeon + female anaesthesiologist                          | Reference              | Reference | Reference               | Reference |
| Male surgeon + male anaesthesiologist                              | 1.07 (1.00-1.15)       | 0.06      | 1.07 (1.00-1.15)        | 0.06      |
| Female surgeon + male anaesthesiologist                            | 0.99 (0.97-1.02)       | 0.52      | 0.99 (0.97-1.02)        | 0.52      |
| Male surgeon + female anaesthesiologist                            | 1.06 (0.99-1.34)       | 0.12      | 1.06 (0.99-1.14)        | 0.12      |
| <b>Model with surgeon sex only:</b>                                |                        |           |                         |           |
| Male surgeon                                                       | 1.02 (0.96-1.09)       | 0.54      | 1.10 (1.03-1.17)        | 0.006     |
| <b>Model with anaesthesiologist sex only:</b>                      |                        |           |                         |           |
| Male anaesthesiologist                                             | 1.16 (0.99-1.04)       | 0.19      | 1.02 (1.00-1.03)        | 0.03      |

Abbreviations: ICU = intensive care unit

**Supplemental Table 6b. Sensitivity analysis of the association between physician sex and lengths of stay in the CABG cohort.**

| Physician Team                                                     | ICU Length of Stay     |           | Hospital Length of Stay |           |
|--------------------------------------------------------------------|------------------------|-----------|-------------------------|-----------|
|                                                                    | Rate Ratio<br>(95% CI) | P-value   | Rate Ratio<br>(95% CI)  | P-value   |
| <b>Model with physician sex as a 4-level categorical variable:</b> |                        |           |                         |           |
| Female surgeon + female anaesthesiologist                          | Reference              | Reference | Reference               | Reference |
| Male surgeon + male anaesthesiologist                              | 1.05 (0.97-1.13)       | 0.21      | 1.07 (1.00-1.15)        | 0.049     |
| Female surgeon + male anaesthesiologist                            | 1.03 (0.98-1.08)       | 0.21      | 1.00 (0.97-1.03)        | 0.90      |
| Male surgeon + female anaesthesiologist                            | 1.05 (0.97-1.13)       | 0.25      | 1.06 (0.99-1.14)        | 0.09      |
| <b>Model with surgeon sex only:</b>                                |                        |           |                         |           |
| Male surgeon                                                       | 1.02 (0.96-1.09)       | 0.48      | 1.10 (1.03-1.18)        | 0.004     |
| <b>Model with anaesthesiologist sex only:</b>                      |                        |           |                         |           |
| Male anaesthesiologist                                             | 1.01 (0.98-1.03)       | 0.55      | 1.02 (1.00-1.04)        | 0.01      |

Abbreviations: ICU = intensive care unit; CABG = coronary artery bypass grafting

STROBE Statement—Checklist of items that should be included in reports of *cohort studies*

|                              | Item No | Recommendation                                                                                                                                                                                                                                                                                                         | Page No |
|------------------------------|---------|------------------------------------------------------------------------------------------------------------------------------------------------------------------------------------------------------------------------------------------------------------------------------------------------------------------------|---------|
| <b>Title and abstract</b>    | 1       | (a) Indicate the study's design with a commonly used term in the title or the abstract<br>(b) Provide in the abstract an informative and balanced summary of what was done and what was found                                                                                                                          | 1-2     |
| <b>Introduction</b>          |         |                                                                                                                                                                                                                                                                                                                        |         |
| Background/rationale         | 2       | Explain the scientific background and rationale for the investigation being reported                                                                                                                                                                                                                                   | 4       |
| Objectives                   | 3       | State specific objectives, including any prespecified hypotheses                                                                                                                                                                                                                                                       | 4       |
| <b>Methods</b>               |         |                                                                                                                                                                                                                                                                                                                        |         |
| Study design                 | 4       | Present key elements of study design early in the paper                                                                                                                                                                                                                                                                | 5       |
| Setting                      | 5       | Describe the setting, locations, and relevant dates, including periods of recruitment, exposure, follow-up, and data collection                                                                                                                                                                                        | 5-6     |
| Participants                 | 6       | (a) Give the eligibility criteria, and the sources and methods of selection of participants. Describe methods of follow-up<br>(b) For matched studies, give matching criteria and number of exposed and unexposed                                                                                                      | 5       |
| Variables                    | 7       | Clearly define all outcomes, exposures, predictors, potential confounders, and effect modifiers. Give diagnostic criteria, if applicable                                                                                                                                                                               | 7       |
| Data sources/<br>measurement | 8*      | For each variable of interest, give sources of data and details of methods of assessment (measurement). Describe comparability of assessment methods if there is more than one group                                                                                                                                   | 6-7     |
| Bias                         | 9       | Describe any efforts to address potential sources of bias                                                                                                                                                                                                                                                              | 7-8     |
| Study size                   | 10      | Explain how the study size was arrived at                                                                                                                                                                                                                                                                              | 9       |
| Quantitative variables       | 11      | Explain how quantitative variables were handled in the analyses. If applicable, describe which groupings were chosen and why                                                                                                                                                                                           | 6-8     |
| Statistical methods          | 12      | (a) Describe all statistical methods, including those used to control for confounding<br>(b) Describe any methods used to examine subgroups and interactions<br>(c) Explain how missing data were addressed<br>(d) If applicable, explain how loss to follow-up was addressed<br>(e) Describe any sensitivity analyses | 7-9     |
| <b>Results</b>               |         |                                                                                                                                                                                                                                                                                                                        |         |
| Participants                 | 13*     | (a) Report numbers of individuals at each stage of study—eg numbers potentially eligible, examined for eligibility, confirmed eligible, included in the study, completing follow-up, and analysed<br>(b) Give reasons for non-participation at each stage<br>(c) Consider use of a flow diagram                        | 9       |
| Descriptive data             | 14*     | (a) Give characteristics of study participants (eg demographic, clinical, social) and information on exposures and potential confounders<br>(b) Indicate number of participants with missing data for each variable of interest<br>(c) Summarise follow-up time (eg, average and total amount)                         | 9       |
| Outcome data                 | 15*     | Report numbers of outcome events or summary measures over time                                                                                                                                                                                                                                                         | 9-11    |

|    |                          |                                                                                                                  |                                                                                                                                                                                                              |       |
|----|--------------------------|------------------------------------------------------------------------------------------------------------------|--------------------------------------------------------------------------------------------------------------------------------------------------------------------------------------------------------------|-------|
| 1  | Main results             | 16                                                                                                               | (a) Give unadjusted estimates and, if applicable, confounder-adjusted estimates and their precision (eg, 95% confidence interval). Make clear which confounders were adjusted for and why they were included | 9-11  |
| 2  |                          | (b) Report category boundaries when continuous variables were categorized                                        |                                                                                                                                                                                                              |       |
| 3  |                          | (c) If relevant, consider translating estimates of relative risk into absolute risk for a meaningful time period |                                                                                                                                                                                                              |       |
| 4  | Other analyses           | 17                                                                                                               | Report other analyses done—eg analyses of subgroups and interactions, and sensitivity analyses                                                                                                               | 11    |
| 5  | <b>Discussion</b>        |                                                                                                                  |                                                                                                                                                                                                              |       |
| 6  | Key results              | 18                                                                                                               | Summarise key results with reference to study objectives                                                                                                                                                     | 12    |
| 7  | Limitations              | 19                                                                                                               | Discuss limitations of the study, taking into account sources of potential bias or imprecision. Discuss both direction and magnitude of any potential bias                                                   | 14    |
| 8  | Interpretation           | 20                                                                                                               | Give a cautious overall interpretation of results considering objectives, limitations, multiplicity of analyses, results from similar studies, and other relevant evidence                                   | 12-14 |
| 9  | Generalisability         | 21                                                                                                               | Discuss the generalisability (external validity) of the study results                                                                                                                                        | 14    |
| 10 | <b>Other information</b> |                                                                                                                  |                                                                                                                                                                                                              |       |
| 11 | Funding                  | 22                                                                                                               | Give the source of funding and the role of the funders for the present study and, if applicable, for the original study on which the present article is based                                                | 16    |

\*Give information separately for exposed and unexposed groups.

**Note:** An Explanation and Elaboration article discusses each checklist item and gives methodological background and published examples of transparent reporting. The STROBE checklist is best used in conjunction with this article (freely available on the Web sites of PLoS Medicine at <http://www.plosmedicine.org/>, Annals of Internal Medicine at <http://www.annals.org/>, and Epidemiology at <http://www.epidem.com/>). Information on the STROBE Initiative is available at <http://www.strobe-statement.org>.

# BMJ Open

## Impact of surgeon and anaesthesiologist sex on patient outcomes after cardiac surgery: a population-based study

|                                 |                                                                                                                                                                                                                                                                                                                                                                                                                                                                                                                                                                                                                                                                                                                                                                                                                            |
|---------------------------------|----------------------------------------------------------------------------------------------------------------------------------------------------------------------------------------------------------------------------------------------------------------------------------------------------------------------------------------------------------------------------------------------------------------------------------------------------------------------------------------------------------------------------------------------------------------------------------------------------------------------------------------------------------------------------------------------------------------------------------------------------------------------------------------------------------------------------|
| Journal:                        | <i>BMJ Open</i>                                                                                                                                                                                                                                                                                                                                                                                                                                                                                                                                                                                                                                                                                                                                                                                                            |
| Manuscript ID                   | bmjopen-2021-051192.R1                                                                                                                                                                                                                                                                                                                                                                                                                                                                                                                                                                                                                                                                                                                                                                                                     |
| Article Type:                   | Original research                                                                                                                                                                                                                                                                                                                                                                                                                                                                                                                                                                                                                                                                                                                                                                                                          |
| Date Submitted by the Author:   | 30-Jun-2021                                                                                                                                                                                                                                                                                                                                                                                                                                                                                                                                                                                                                                                                                                                                                                                                                |
| Complete List of Authors:       | Sun, Louise; University of Ottawa Heart Institute, Division of Cardiac Anesthesiology; Institute for Clinical Evaluative Sciences<br>Boet, S; University of Ottawa Faculty of Medicine, Department of Anesthesiology and Pain Medicine; Ottawa Hospital Research Institute, Clinical Epidemiology Program<br>Chan, Vincent; University of Ottawa Heart Institute, Division of Cardiac Surgery<br>Lee, Douglas; Institute for Clinical Evaluative Sciences; University Health Network, Peter Munk Cardiac Centre<br>Mesana, Thierry; University of Ottawa Heart Institute<br>Bader Eddeen, Anan; Institute for Clinical Evaluative Sciences, Etherington, Cole; Ottawa Hospital Research Institute, Clinical Epidemiology Program; University of Ottawa Faculty of Medicine, Department of Anesthesiology and Pain Medicine |
| <b>Primary Subject Heading</b>: | Cardiovascular medicine                                                                                                                                                                                                                                                                                                                                                                                                                                                                                                                                                                                                                                                                                                                                                                                                    |
| Secondary Subject Heading:      | Health services research                                                                                                                                                                                                                                                                                                                                                                                                                                                                                                                                                                                                                                                                                                                                                                                                   |
| Keywords:                       | Cardiac surgery < SURGERY, Anaesthesia in cardiology < ANAESTHETICS, EPIDEMIOLOGY                                                                                                                                                                                                                                                                                                                                                                                                                                                                                                                                                                                                                                                                                                                                          |
|                                 |                                                                                                                                                                                                                                                                                                                                                                                                                                                                                                                                                                                                                                                                                                                                                                                                                            |

SCHOLARONE™  
Manuscripts



I, the Submitting Author has the right to grant and does grant on behalf of all authors of the Work (as defined in the below author licence), an exclusive licence and/or a non-exclusive licence for contributions from authors who are: i) UK Crown employees; ii) where BMJ has agreed a CC-BY licence shall apply, and/or iii) in accordance with the terms applicable for US Federal Government officers or employees acting as part of their official duties; on a worldwide, perpetual, irrevocable, royalty-free basis to BMJ Publishing Group Ltd ("BMJ") its licensees and where the relevant Journal is co-owned by BMJ to the co-owners of the Journal, to publish the Work in this journal and any other BMJ products and to exploit all rights, as set out in our [licence](#).

The Submitting Author accepts and understands that any supply made under these terms is made by BMJ to the Submitting Author unless you are acting as an employee on behalf of your employer or a postgraduate student of an affiliated institution which is paying any applicable article publishing charge ("APC") for Open Access articles. Where the Submitting Author wishes to make the Work available on an Open Access basis (and intends to pay the relevant APC), the terms of reuse of such Open Access shall be governed by a Creative Commons licence – details of these licences and which [Creative Commons](#) licence will apply to this Work are set out in our licence referred to above.

Other than as permitted in any relevant BMJ Author's Self Archiving Policies, I confirm this Work has not been accepted for publication elsewhere, is not being considered for publication elsewhere and does not duplicate material already published. I confirm all authors consent to publication of this Work and authorise the granting of this licence.

**Title:** Impact of surgeon and anaesthesiologist sex on patient outcomes after cardiac surgery: a population-based study

**Authors:**

Louise Y. Sun, MD, SM<sup>1,2,3,4,5</sup>

Sylvain Boet, MD, PhD<sup>4,5,6</sup>

Vincent Chan, MD, MPH<sup>7</sup>

Douglas S. Lee, MD, PhD<sup>2,8</sup>

Thierry G. Mesana, MD, PhD<sup>7</sup>

Anan Bader Eddeen, MSc<sup>2</sup>

Cole Etherington, PhD<sup>4,5</sup>

<sup>1</sup>Division of Cardiac Anesthesiology, University of Ottawa Heart Institute

<sup>2</sup>Institute for Clinical Evaluative Sciences, Ontario, Canada

<sup>3</sup>School of Epidemiology and Public Health, University of Ottawa

<sup>4</sup>Department of Anesthesiology and Pain Medicine, Faculty of Medicine, University of Ottawa

<sup>5</sup>Clinical Epidemiology Program, Ottawa Hospital Research Institute

<sup>6</sup>Department of Innovation in Medical Education, Faculty of Medicine, University of Ottawa

<sup>7</sup>Division of Cardiac Surgery, University of Ottawa Heart Institute

<sup>8</sup>Peter Munk Cardiac Centre, University Health Network, University of Toronto

**Corresponding Author:**

Louise Sun, MD SM FRCPC FAHA

Clinician Scientist and Associate Professor

University of Ottawa Heart Institute, Rm H-2206, 40 Ruskin Street, Ottawa, Ontario, K1Y 4W7

Telephone: 613-696-7381 Email: lsun@ottawaheart.ca

**Manuscript word count:** 2813

**Running Title:** Physician sex and outcomes in cardiac surgery

**Keywords:** cardiac surgery, operating room, teamwork, surgeon, anaesthesiologist, sex, outcomes



## Abstract

**Background:** Effective teamwork between anaesthesiologists and surgeons is essential for optimizing patient safety in the cardiac operating room (OR). While many factors may influence the relationship between these two physicians, the role of sex and gender have yet to be investigated.

**Objectives:** We sought to determine the association between cardiac physician team sex discordance and patient outcomes.

**Design:** We performed a population-based, retrospective cohort study.

**Participants and Setting:** Adult patients who underwent CABG and/or aortic, mitral or tricuspid valve surgery between 2008 and 2018 in Ontario, Canada.

**Primary and Secondary Outcome Measures:** The primary outcome was all-cause 30-day mortality. Secondary outcomes included major adverse cardiovascular events (MACE) at 30-days and hospital and intensive care unit lengths of stay (LOS). Mixed effects logistic regression was used for categorical outcomes and Poisson regression for continuous outcomes.

**Results:** 79,862 patients underwent cardiac surgery by 98 surgeons (11.2% female) and 279 anaesthesiologists (23.3% female); 19,893 (24.9%) were treated by sex-discordant physician teams. Physician sex discordance was not associated with overall patient mortality or LOS; however, patients who underwent isolated CABG experienced longer hospital LOS when treated by an all-male physician team as compared to an all-female team (adjusted odds ratio [OR]=1.07; p=0.049). When examining the impact of individual physician sex, the length of hospital stay was longer when isolated CABG procedures were attended by a male surgeon (OR=1.10; p=0.004) or anaesthesiologist (OR=1.02; p=0.01).

1  
2  
3 **Conclusions:** Patient mortality and length of stay after cardiac surgery may vary by sex concordance of  
4  
5 the attending surgeon-anaesthesiologist team. Further research is needed to examine the underlying  
6  
7 mechanisms of these observed relationships.  
8

9  
10 **Strengths and limitations of this study**

- 11  
12 • Robust statistical methods were applied to a novel research question.  
13  
14 • Analyses were limited to physician characteristics.  
15  
16 • Information on gender was not available in the databases used; accordingly, only biological sex  
17  
18 could be studied.  
19  
20  
21 • Analyses were quantitative. Findings could be further explored in future qualitative studies.  
22  
23  
24  
25  
26  
27  
28  
29  
30  
31  
32  
33  
34  
35  
36  
37  
38  
39  
40  
41  
42  
43  
44  
45  
46  
47  
48  
49  
50  
51  
52  
53  
54  
55  
56  
57  
58  
59  
60

## Introduction

Teamwork between anaesthesiologists and surgeons, who share leadership roles in the operating room (OR), is critical for full team performance and patient outcome, particularly during times of crisis.<sup>1-3</sup> Poor non-technical skills (e.g. communication, teamwork, leadership) are one of the main contributing factors to adverse events in surgery.<sup>4</sup> Incivility between the OR physician dyad has recently been demonstrated to impair anaesthesiologist performance and increase the likelihood of patient fatality during an operative crisis.<sup>3</sup> In the cardiac operating room (COR), where crisis situations are common, effective teamwork and communication between surgeons and anaesthesiologists may be even more important contributors to patient morbidity and mortality.<sup>5</sup>

While the quality of interactions between surgeons and anaesthesiologists may be driven by a variety of factors, emerging evidence suggests that sex (i.e. biological attributes) and gender (i.e. social constructed norms, roles, behaviors, expressions and identities) in particular warrant further investigation. In the broader realm of medical and surgical practice, physician sex and gender have been shown to influence physician practice patterns,<sup>6</sup> medical education,<sup>7</sup> assessment,<sup>8</sup> remuneration,<sup>9</sup> perceptions of safety culture,<sup>10</sup> burnout,<sup>11</sup> job satisfaction,<sup>11</sup> psychological well-being,<sup>11</sup> and patient outcomes.<sup>12 13</sup> In the high stakes setting of the COR, physician sex and gender may be especially influential given the culmination of many stressors associated with implicit bias<sup>14</sup> and a marked male predominance in comparison to other surgical specialties.<sup>15</sup>

Despite its potential importance to operative success and COR team-based culture, the association between surgeon and anaesthesiologist sex and patient outcomes has yet to be examined in this context. As a first step toward understanding the role of physician sex and gender in the COR, this study aimed to explore the association between physician sex discordance and patient outcomes after cardiac surgery. We hypothesized that better patient outcomes would be observed following cardiac surgery if cared for by COR teams comprised of a surgeon and anaesthesiologist of the same sex.

## Methods

The use of data in this project was authorized under section 45 of Ontario's *Personal Health Information Protection Act*, which does not require review by a Research Ethics Board. Patient data were deidentified before access by the study authors. The dataset from this study is held securely in coded form at ICES (formerly the Institutes for Clinical Evaluative Sciences).<sup>16</sup> This study is reported in accordance to the STROBE checklist.<sup>17</sup>

### *Design Study Population*

We conducted a population-based, retrospective cohort study of Ontario residents 18 years of age or older, who underwent first-time index coronary artery bypass grafting (CABG), and/or aortic, mitral or tricuspid valve surgery between October 1, 2008 and December 31, 2018. Patient exclusion criteria were non-Ontario residency status, those with missing information regarding age and sex, and those who had concomitant arrhythmia, pulmonic valve or thoracic aorta surgery. In addition, patients treated by non-cardiac surgeons and those whose primary cardiac surgeon and/or anaesthesiologist could not be identified, were excluded. A flow diagram detailing the process used to select the study cohort is shown in Supplemental Figure 1.

### *Data Sources*

We used the clinical registry data from CorHealth Ontario and the population-level administrative healthcare databases from ICES. ICES is an independent, non-profit research institute whose legal status under Ontario's health information privacy law allows it to collect and analyze health care and demographic data, without consent, for health system evaluation and improvement. Ontario is Canada's most populous province with a publicly funded, universal health care system that reimburses all medically necessary services. CorHealth maintains a detailed prospective registry of all patients

1  
2  
3 undergoing invasive cardiac procedures in Ontario from 20 advanced cardiac care hospitals. CorHealth  
4 demographic, comorbidity and procedural data has been validated through multiple chart audits.<sup>18</sup>  
5  
6

7 We deterministically linked the following administrative databases by using unique encoded  
8 identifier and analyzed them at ICES. Date and type of cardiac procedure from the CorHealth registry  
9 was linked with the ICES Physicians Database (physician demographics and clinical specialty), Canadian  
10 Institute for Health Information's Discharge Abstract Database (CIHI-DAD; comorbidities and hospital  
11 admissions), Ontario Health Insurance Plan (OHIP) database (physician service claims), Registered  
12 Persons Database (RPDB; vital statistics), and the Canadian census. These administrative databases have  
13 been validated for outcomes, exposures, and comorbidities, including heart failure (HF), chronic  
14 obstructive pulmonary disease (COPD), asthma, hypertension, myocardial infarction (MI) and  
15 diabetes.<sup>19-21</sup>  
16  
17  
18  
19  
20  
21  
22  
23  
24  
25  
26  
27  
28  
29

### 30 *Patient and Procedure Characteristics*

31  
32 Patient characteristics were identified from the CorHealth registry and supplemented with data  
33 from the CIHI-DAD and OHIP, using International Classification of Diseases (10<sup>th</sup> Revision; ICD-10-  
34 CA) codes within five years prior to the index procedure and according to validated algorithms.<sup>22 23</sup> We  
35 estimated each patient's socioeconomic status by using the neighborhood median income from the  
36 Canadian census<sup>24</sup> and determined residence status (rural versus urban) using Statistics Canada  
37 definitions.<sup>25</sup> Height, weight, and body mass index (BMI) were identified from the CorHealth Ontario  
38 registry and used to determine morbid obesity (defined as weight >159 kg or BMI  $\geq$ 40 kg/m<sup>2</sup>).<sup>26</sup> Frailty  
39 status was identified using the Johns Hopkins Adjusted Clinical Groups (ACG® System) frailty-defining  
40 diagnoses indicator, which is an instrument designed and validated for research of frailty-related  
41 outcomes and resource utilization using administrative data.<sup>27 28</sup>  
42  
43  
44  
45  
46  
47  
48  
49  
50  
51  
52  
53  
54  
55  
56  
57  
58  
59  
60

1  
2  
3  
4  
5  
6  
7  
8  
9  
10  
11  
12  
13  
14  
15  
16  
17  
18  
19  
20  
21  
22  
23  
24  
25  
26  
27  
28  
29  
30  
31  
32  
33  
34  
35  
36  
37  
38  
39  
40  
41  
42  
43  
44  
45  
46  
47  
48  
49  
50  
51  
52  
53  
54  
55  
56  
57  
58  
59  
60

Emergent procedural status was ascertained using the CorHealth registry and supplemented by OHIP code E020C for emergent procedures.<sup>26 29</sup> We defined procedure complexity as simple (isolated CABG or single valve) vs. complex (multiple valves or combined valve(s) + CABG). Information on surgery duration was obtained from the CIHI-DAD.

### *Exposures*

The primary exposure was surgeon-anaesthesiologist sex discordance (i.e., surgeon and anaesthesiologist were of the opposite sex) vs. concordance (i.e., both treating physicians were of the same sex). Secondary exposures consisted of demographic characteristics of the primary surgeons and anaesthesiologists, including age, sex, years since medical school graduation, specialty, hospital, and total number of procedures performed since the inception of ICES databases in 1991 until the date of the index procedure.

### *Outcomes At 30 Days*

Outcomes were assessed from the date of the procedure until 30 days postoperatively. The primary outcome was all-cause mortality. Secondary outcomes were hospital and intensive care unit (ICU) lengths of stay (LOS) as well as major adverse cardiovascular events (MACE). MACE was defined as a composite of stroke, repeat revascularization, hospitalization for MI and HF. Stroke included ischemic stroke and was generally defined as new focal or global neurologic deficit of cerebrovascular origin lasting 24 hours or longer that was not present before surgery.

### *Statistical Analysis*

L.Y.S. and A.B.E. had full access to all of the data in the study and take responsibility for its integrity and for the data analysis. Continuous variables were compared with a Student's t-test, or with a

1  
2  
3 Wilcoxon rank-sum test for non-normally distributed data. Categorical variables were compared with a  
4  
5 chi-square test. The association between physician sex discordance and patient outcomes was modeled  
6  
7 using mixed effects logistic regression for categorical outcomes and Poisson regression for continuous  
8  
9 outcomes. In each of these models, the choice of surgeon, anaesthesiologist, and hospital were treated as  
10  
11 random intercepts and physician, patient and procedure characteristics were fixed effects. We tested for  
12  
13 potential effect modification by patient sex, procedure complexity, emergent operative status, and  
14  
15 hospital type (teaching vs. community) using multiplicative interaction terms.  
16  
17  
18  
19  
20

### 21 *Subgroup Analysis*

22  
23 Subgroup analyses were planned *a priori*. Surgeons who underwent subspecialized training (e.g.,  
24  
25 valvular repair) are more likely to excel in these procedures. However, CABG is a “bread and butter”  
26  
27 cardiac procedure in which reduced variations in surgical results are expected to occur. We therefore also  
28  
29 performed our analyses in patients who underwent isolated CABG.  
30  
31  
32  
33

### 34 *Sensitivity Analyses*

35  
36  
37 We repeated our multivariable analyses *first* by further classifying physician sex into male  
38  
39 surgeon - male anaesthesiologist, male surgeon - female anaesthesiologist, female surgeon - male  
40  
41 anaesthesiologist, and female surgeon - female anaesthesiologist. *Next*, we studied individually the  
42  
43 impact of surgeon and anaesthesiologist sex.  
44  
45  
46  
47

48  
49 Analyses were performed using SAS 9.4 (SAS Institute, USA) and R 3.5.3 (R Foundation,  
50  
51 Austria). Statistical significance was defined as a two-sided P-value of  $< 0.05$ .  
52  
53  
54

### 55 *Patient and Public Involvement*

1  
2  
3 Patients and the public were not involved in the conduct of this research study.  
4  
5  
6  
7  
8  
9  
10  
11  
12  
13  
14  
15  
16  
17  
18  
19  
20  
21  
22  
23  
24  
25  
26  
27  
28  
29  
30  
31  
32  
33  
34  
35  
36  
37  
38  
39  
40  
41  
42  
43  
44  
45  
46  
47  
48  
49  
50  
51  
52  
53  
54  
55  
56  
57  
58  
59  
60

For peer review only



## Results

A total of 79,862 patients who underwent first-time cardiac surgery met our inclusion criteria (23.4% female). During the study period, surgeries were performed by 98 surgeons (11.2% female) and 279 anaesthesiologists (23.3% female), who formed 2,079 unique physician teams (3.0% both female, 67.6% both male, 9.0% female surgeon - male anaesthesiologist, 20.4% male surgeon - female anaesthesiologist). A total of 19,893 (24.9%) patients were treated by sex-discordant COR physician teams (7.2% by female surgeon - male anaesthesiologist, 17.7% male surgeon - female anaesthesiologist). In contrast, 1,188 (1.5%) patients were treated by all-female physician teams and 58,781 (73.6%) by all-male teams.

While most baseline patient characteristics were similar between those treated by sex discordant vs. concordant physicians (Table 1), those treated by sex discordant physicians were more likely to be morbidly obese, to undergo surgeries of longer duration, but were less likely to be frail. No clinically significant differences were observed in the characteristics of physicians who treated female vs. male patients (Table 2).

### *Mortality*

A total of 335 (1.7%) patients treated by sex discordant and 1,052 (1.8%) by sex concordant physicians died within 30 days of surgery ( $p=0.51$ , Table 3). The adjusted OR of 30-day mortality was 0.93 (95% CI 0.80-1.07) for sex discordant physicians, and none of the other physician characteristics were independent mortality risk factors (Table 4). The association of physician sex discordance and 30-day mortality was not modified by patient sex (interaction  $p=0.33$ ), complex surgery (interaction  $p=0.20$ ), emergent operative status (interaction  $p=0.92$ ), and hospital type (interaction  $p=0.92$ ).

1  
2  
3  
4  
5 A total of 205 (1.3%) patients who underwent isolated CABG patients by sex discordant and 654  
6  
7 (1.4%) by sex concordant physicians died within 30 days of surgery ( $p=0.41$ , Supplemental Table 1).  
8  
9 Physician sex discordance was not associated with 30-day mortality (adjusted OR 0.88, 0.74 to 1.05,  
10  
11 Supplemental Table 2), and we did not observe a statistically significant interaction between physician  
12  
13 sex discordance and patient sex (interaction  $P=0.59$ ), off-pump CABG (interaction  $p=0.06$ ), emergent  
14  
15 operative status (interaction  $p=0.57$ ), and hospital type (interaction  $p=0.62$ ).  
16  
17  
18  
19  
20

### 21 *MACE*

22  
23 At 30 days, MACE occurred in 678 (3.4%) patients who were treated by sex discordant and 2,247  
24  
25 (3.7%) by sex concordant physicians ( $p=0.03$ , Table 3). Neither physician sex discordance (adjusted OR  
26  
27 0.96 [0.87-1.06]), nor any other physician characteristics, were independently associated with MACE  
28  
29 (Supplemental Table 3). No modifiers of the association of physician sex discordance with MACE were  
30  
31 identified.  
32  
33  
34  
35  
36

37 In patients who underwent isolated CABG, 524 (3.3%) treated by sex discordant and 1,692  
38  
39 (3.6%) by sex concordant physicians developed MACE ( $p=0.12$ , Supplemental Table 1). We did not  
40  
41 observe a statistically significant association between physician sex discordance and MACE (adjusted  
42  
43 OR 0.99 [0.98-1.11], Supplemental Table 2), and no effect modifiers of the association between  
44  
45 physician sex discordance and MACE were identified.  
46  
47  
48  
49  
50

### 51 *ICU and Hospital LOS*

52  
53 Median ICU and hospital LOS were 2 days (IQR, 2-3) and 7 days (6-9), respectively, both in  
54  
55 patients who were treated by sex discordant and concordant physicians (Table 3). Physician sex  
56  
57  
58  
59  
60

1  
2 discordance was not associated with ICU or hospital LOS in the overall (Supplemental Table 4) nor the  
3  
4 isolated CABG group (Supplemental Table 2), and no effect modifiers were identified of the association  
5  
6 between physician sex discordance and ICU/hospital LOS.  
7  
8  
9

### 10 11 *Sensitivity Analyses*

#### 12 13 14 15 16 Surgeon-Anaesthesiologist Sex as a Four-Level Categorical Variable

17  
18 We did not observe an independent association between teams comprised of male surgeon - male  
19  
20 anaesthesiologist, male surgeon - female anaesthesiologist, female surgeon - male anaesthesiologist, and  
21  
22 female surgeon - female anaesthesiologist, and 30-day mortality, MACE, or ICU LOS (Supplemental  
23  
24 Tables 5a and 5b). However, an all-male physician team as compared to an all-female team was  
25  
26 associated with longer hospital LOS in CABG patients (adjusted OR=1.07 [1.00-1.15]; p=0.049)  
27  
28 (Supplemental Table 6a).  
29  
30  
31  
32  
33

#### 34 35 Individual Contribution of Surgeon and Anaesthesiologist Sex

36  
37 Male as compared to female surgeon (adjusted OR=1.10 [1.03-1.18]; p=0.004), and male vs.  
38  
39 female anaesthesiologist (adjusted OR=1.02 [1.00-1.04]; p=0.01), was associated with longer hospital  
40  
41 LOS in the overall and CABG patient groups (Supplemental Table 6b).  
42  
43  
44  
45

#### 46 47 Post-hoc analyses

48  
49  
50  
51  
52  
53  
54  
55  
56  
57  
58  
59  
60

1  
2 We conducted a post-hoc power analysis to determine whether the lack of observed between group  
3 mortality difference was due to the small number of outcome events. Using logistic regression with a  
4 mortality difference was due to the small number of outcome events. Using logistic regression with a  
5 sample size of 79,862 patients (24.9% treated by sex discordant surgeon-anesthesiologist pairs) and an  
6 observed OR of 0.93, we were able to achieve 19% power at a 0.05 significance level. At the request of  
7 the reviewers, we repeated our analysis for the composite endpoint of death and MACE. The findings of  
8 this post hoc analysis also did not reach statistical significance (adjusted OR, 0.96 [0.88-1.05], p=0.37;  
9 Supplemental Table 7).

## 10 Supplemental Table 7).**Discussion**

### 11 *Key Findings*

12 The novelty of the present study lies in its consideration of the impact of surgeon-  
13 anaesthesiologist dyad on patient outcomes after cardiac surgery. Our key findings are as follows: 1)  
14 Physician sex discordance was not associated with overall patient mortality or LOS; 2) Patients who  
15 underwent isolated CABG experienced longer hospital LOS when treated by an all-male physician team  
16 as compared to an all-female team; 3) When examining the impact of individual physician sex, the length  
17 of hospital stay was clinically and statistically significantly longer when procedures were attended by a  
18 male surgeon.

### 19 *Interpretation*

20 We found that physician sex discordance was not associated with overall patient mortality or  
21 LOS. This stands contrary to our hypothesis as well as reports from other studies suggesting a greater  
22 opportunity for tension within sex discordant teams. For example, studies based on non-cardiac OR teams  
23 suggest female providers may more often be challenged and perceived negatively by others, and are less  
24 likely to speak up when an incorrect decision is made.<sup>6 30 31</sup> Teamwork behaviors such as cooperation,  
25 communication, and leadership, have also been observed to vary depending on the number of male and  
26

1  
2 female providers in the room.<sup>6 31 32</sup> Our findings suggest that sex diversity in the COR may actually  
3  
4 increase cooperation.<sup>32</sup> In fact, the COR teamwork culture may be changing in recent years, such that  
5  
6 sex discordant surgeon-anaesthesiologist pairs are working more effectively together in achieving the  
7  
8 observed lower rates of mortality. Further research is needed to qualitatively determine the relevance of  
9  
10 this finding to teamwork quality and physician performance.  
11  
12  
13  
14  
15

16 While previous studies have investigated the role of physician sex individually for surgeons,<sup>12</sup>  
17  
18 and primary care practitioners,<sup>33</sup> we extended this analysis to include the dynamic relationship of the  
19  
20 cardiac surgeon and anaesthesiologist team. A recent study of 25 cardiac and non-cardiac procedure types  
21  
22 performed in Ontario, found that patients treated by female surgeons compared to male surgeons had a  
23  
24 lower 30-day mortality (adjusted odds ratio 0.88; 95% CI: 0.79-0.99, P=0.04).<sup>12</sup> These authors  
25  
26 postulated, however, that better outcomes in the hands of female surgeons may have been confounded  
27  
28 by a higher volume of non-emergent, non-complex procedures being performed by this group. Our  
29  
30 subgroup analysis in patients who underwent CABG, a routine procedure, was aimed to overcome this  
31  
32 case allocation bias. We observed clinically and statistically significant longer lengths of hospital stay in  
33  
34 those treated by all-male surgeon-anaesthesiologist teams as compared to all-female teams, as well as  
35  
36 individually by male surgeons. Though researchers have postulated a variety of reasons for better patient  
37  
38 outcomes among female surgeons<sup>12 13</sup> and primary care physicians,<sup>33</sup> less work has been done to examine  
39  
40 how sex and gender may influence anaesthesia practice or team-based work in the COR. Our findings  
41  
42 may in part be explained by greater adherence to practice guidelines by female surgeons and  
43  
44 anaesthesiologists, as well as their propensity for more effective interprofessional teamwork, and more  
45  
46 active engagement in patient-centered care.<sup>34 35</sup>  
47  
48  
49  
50  
51  
52  
53  
54  
55  
56  
57  
58  
59  
60

1  
2  
3 The performance of female physicians has also been framed in terms of the challenges they must  
4 often overcome to practice effectively in the surgical specialties. For example, Wallis and colleagues  
5 suggested that it is possible that “these barriers might create a higher standard for women to gain entrance  
6 into the surgical workforce than men, resulting in the selection of a cohort of women that are  
7 proportionately more skilled, motivated, and harder working”.<sup>12</sup> This may be particularly true of cardiac  
8 surgery given it is amongst the most demanding specialties and is traditionally viewed as a male  
9 dominated field. Still, studies regarding medical emergencies outside of the COR setting have found that  
10 male healthcare professionals outperform their female colleagues, albeit at least in part because women’s  
11 leadership is more likely to be challenged.<sup>6,31</sup> Consequently, more research is needed to determine when  
12 and how to best support male and female physicians to promote effective practice and equity in the COR.  
13 As more women continue to pursue cardiac surgery and anesthesiology, it will be important for research  
14 to deep-dive into their performance and experiences; this includes the impact of diversity on COR  
15 teamwork.  
16  
17  
18  
19  
20  
21  
22  
23  
24  
25  
26  
27  
28  
29  
30  
31  
32  
33  
34

### 35 *Limitations*

36  
37 *Firstly*, an important limitation of our study is that we were only able to examine the impact of  
38 sex as gender variables were not available in the databases used. In the future, organizations may wish  
39 to consider incorporating measures of gender as routinely collected elements. *Secondly*, our findings are  
40 quantitative, and are limited by the inherent biases of observational studies. Prospective, qualitative  
41 research is warranted to further explore the role of physician sex and gender in the COR along with other  
42 potentially important factors such as ethnicity, language, geographic location, country of medical  
43 education, and so forth.<sup>36,37</sup> *Thirdly*, an a priori power analysis was not performed. *Fourthly*, our analyses  
44 were limited to physician characteristics as the characteristics of other COR providers were not available  
45  
46  
47  
48  
49  
50  
51  
52  
53  
54  
55  
56  
57  
58  
59  
60

1  
2 to us. Future research should consider the interaction of the surgeon and anaesthesiologist pair along with  
3  
4  
5 nurses, perfusionists, anaesthesia and surgical assistances, and trainees.  
6  
7

## 8 9 **Conclusions**

10 Patient mortality and length of stay after cardiac surgery may vary by sex concordance of the attending  
11  
12 surgeon-anaesthesiologist team. Further research is needed to examine the underlying mechanisms of  
13  
14 these observed relationships.  
15  
16  
17  
18  
19  
20  
21  
22  
23  
24  
25  
26  
27  
28  
29  
30  
31  
32  
33  
34  
35  
36  
37  
38  
39  
40  
41  
42  
43  
44  
45  
46  
47  
48  
49  
50  
51  
52  
53  
54  
55  
56  
57  
58  
59  
60

## **Funding Statement**

This study was supported by operating grants from the University of Ottawa Department of Anesthesiology and Pain Medicine (Grant #4772), and the ORACLE innovations fund of the University of Ottawa Heart Institute (UOHI) (Grant #4779). LYS was named National New Investigator by the Heart and Stroke Foundation of Canada and is supported by the Ottawa Heart Institute Research Corporation and a Tier 2 Clinical Research Chair in Big Data and Cardiovascular Outcomes at the University of Ottawa (Grant #s N/A). SB is supported by the Ottawa Hospital Anesthesia Alternate Funds Association and a Tier 2 Clinical Research Chair at the University of Ottawa (Grant # N/A). DSL is supported by a Mid-Career Investigator Award from the Heart and Stroke Foundation (Grant # N/A). TGM is supported by an endowed research chair at the UOHI (Grant # N/A). This study was supported by ICES, which is funded by an annual grant from the Ontario Ministry of Health (MOH) and the Ministry of Long-Term Care (MLTC) (Grant # N/A). Parts of this material are based on data and information compiled and provided by the Canadian Institute for Health Information (CIHI) (Grant # N/A). The authors acknowledge that the clinical registry data used in this analysis is from participating hospitals through CorHealth Ontario, which serves as an advisory body to the MOH, is funded by the MOH, and is dedicated to improving the quality, efficiency, access and equity in the delivery of the continuum of adult cardiac and stroke care in Ontario, Canada. In this project, frailty was identified using the Johns Hopkins ACG® System version 10. The analyses, conclusions, opinions and statements expressed herein are solely those of the authors and do not reflect those of the funding or data sources; no endorsement is intended or should be inferred.

## **Declaration Of Interests**

The authors report no conflicts of interest.



## Authors' Contribution

The corresponding author attests that all listed authors meet authorship criteria and that no others meeting the criteria have been omitted.

LYS, SB, VC, DSL, TGM, ABE, NE: Contributed substantially to conception and design, or analysis and interpretation of data, drafted the article, revised article critically for important intellectual content, gave final approval of the version to be published, agreed to act as guarantor of the work (ensuring that questions related to any part of the work are appropriately investigated and resolved).

The authors also acknowledge the usage of data compiled and provided by the Canadian Institute for Health Information. These datasets were linked using unique encoded identifiers and analyzed at ICES. The analyses, conclusions, opinions and statements expressed in the manuscript are those of the authors, and do not necessarily reflect those of the above agencies.

## Data Sharing Statement

The dataset from this study is held securely in coded form at ICES. While legal data sharing agreements between ICES and data providers (e.g., healthcare organizations and government) prohibit ICES from making the dataset publicly available, access may be granted to those who meet pre-specified criteria for confidential access, available at [www.ices.on.ca/DAS](http://www.ices.on.ca/DAS) (email: [das@ices.on.ca](mailto:das@ices.on.ca)). The full dataset creation plan and underlying analytic code are available from the authors upon request, understanding that the computer programs may rely upon coding templates or macros that are unique to ICES and are therefore either inaccessible or may require modification.

## Ethical approval statement

The use of data in this project was authorized under section 45 of Ontario's Personal Health Information

1  
2  
3 Protection Act, which does not require review by a Research Ethics Board.  
4  
5  
6  
7  
8  
9  
10  
11  
12  
13  
14  
15  
16  
17  
18  
19  
20  
21  
22  
23  
24  
25  
26  
27  
28  
29  
30  
31  
32  
33  
34  
35  
36  
37  
38  
39  
40  
41  
42  
43  
44  
45  
46  
47  
48  
49  
50  
51  
52  
53  
54  
55  
56  
57  
58  
59  
60

## REFERENCES

1. Cooper JB. Critical role of the surgeon-anesthesiologist relationship for patient safety. *Anesthesiology* 2018; **129**: 402–5
2. Attri JP, Sandhu GK, Mohan B, Bala N, Sandhu KS, Bansal L. Conflicts in operating room: Focus on causes and resolution. Saudi J. Anaesth. Medknow Publications; 2015. p. 457–63
3. Katz D, Blasius K, Isaak R, et al. Exposure to incivility hinders clinical performance in a simulated operative crisis. *BMJ Qual Saf* 2019; **28**: 750–7
4. Baker GR, Norton PG, Flintoft V, et al. The Canadian Adverse Events Study: the incidence of adverse events among hospital patients in Canada. *CMAJ* [Internet] 2004; **170**: 1678–86 Available from: <http://www.pubmedcentral.nih.gov/articlerender.fcgi?artid=408508&tool=pmcentrez&rendertype=abstract>
5. Schraagen JM, Schouten T, Smit M, et al. Assessing and improving teamwork in cardiac surgery. *Qual Saf Health Care* [Internet] England; 2010; **19**: e29 Available from: <http://ovidsp.ovid.com/ovidweb.cgi?T=JS&PAGE=reference&D=med5&NEWS=N&AN=21127091>
6. Amacher SA, Schumacher C, Legeret C, et al. Influence of Gender on the Performance of Cardiopulmonary Rescue Teams. *Crit Care Med* [Internet] 2017; **45**: 1 Available from: <http://insights.ovid.com/crossref?an=00003246-900000000-96610>
7. Mueller AS, Jenkins TM, Osborne M, Dayal A, O'Connor DM, Arora VM. Gender Differences in Attending Physicians' Feedback to Residents: A Qualitative Analysis. *J Grad Med Educ* [Internet] 2017; **9**: 577–85 Available from: <http://www.jgme.org/doi/10.4300/JGME-D-17-00126.1>
8. Dayal A, O'Connor DM, Qadri U, Arora VM. Comparison of male vs female resident milestone evaluations by faculty during emergency medicine residency training. *JAMA Intern Med* 2017; **177**: 651–7
9. Sarsons H, Akhtari M, Barron K, et al. Interpreting Signals in the Labor Market: Evidence from Medical Referrals. 2017 [cited 2017 Dec 11]; Available from: [https://scholar.harvard.edu/files/sarsons/files/sarsons\\_jmp.pdf](https://scholar.harvard.edu/files/sarsons/files/sarsons_jmp.pdf)
10. Gambashidze N, Hammer A, Wagner A, et al. Influence of Gender, Profession, and Managerial Function on Clinicians' Perceptions of Patient Safety Culture. *J Patient Saf* 2019; **00**: 1
11. Burns KEA, Fox-Robichaud A, Lorens E, Martin CM. Gender differences in career satisfaction, moral distress, and incivility: a national, cross-sectional survey of Canadian critical care physicians. *Can J Anesth* [Internet] Springer International Publishing; 2019; **66**: 503–11 Available from: <https://doi.org/10.1007/s12630-019-01321-y>
12. Wallis CJ, Ravi B, Coburn N, Nam RK, Detsky AS, Satkunasivam R. Comparison of postoperative outcomes among patients treated by male and female surgeons: a population based matched cohort study. *Bmj* [Internet] 2017; **359**: j4366 Available from:

1  
2  
3 <http://www.bmj.com/lookup/doi/10.1136/bmj.j4366>

- 4  
5 13. Sharoky CE, Sellers MM, Keele LJ, et al. Does Surgeon Sex Matter?: Practice Patterns and  
6 Outcomes of Female and Male Surgeons. *Ann Surg* 2017; **267**: 1069–76
- 7  
8 14. Johnson T, Hickey R, Switzer G, et al. The Impact of Cognitive Stressors in the Emergency  
9 Department on Physician Implicit Racial Bias. *Acad Emerg Med* [Internet] 2016; **23**: 297–305  
10 Available from: file:///C:/Users/Carla Carolina/Desktop/Artigos para acrescentar na  
11 qualificação/The impact of birth weight on cardiovascular disease risk in the.pdf
- 12  
13 15. Canadian Medical Association. Cardiovascular / Thoracic Surgery Profile [Internet]. Ottawa,  
14 ON; 2018 Available from: <https://cma.ca/sites/default/files/2019-01/cardiothoracic-surgery-e.pdf>
- 15  
16 16. Victor JC, Monto AS, Surdina TY, et al. Hepatitis A vaccine versus immune globulin for  
17 postexposure prophylaxis. *N Engl J Med* Massachusetts Medical Society; 2007; **357**: 1685–94
- 18  
19 17. Von Elm E, Altman DG, Egger M, Pocock SJ, Gøtzsche PC, Vandenbroucke JP. The  
20 Strengthening the Reporting of Observational Studies in Epidemiology (STROBE) statement:  
21 guidelines for reporting observational studies. [cited 2018 Feb 20]; Available from:  
22 [http://www.jclinepi.com/article/S0895-4356\(07\)00436-2/pdf](http://www.jclinepi.com/article/S0895-4356(07)00436-2/pdf)
- 23  
24 18. Tu J, Ko D, Guo H, et al. Determinants of variations in coronary revascularization practices.  
25 *CMAJ* 2012; **184**: 179–86
- 26  
27 19. Tu K, Campbell NR, Chen Z-L, Cauch-Dudek KJ, McAlister FA. Accuracy of administrative  
28 databases in identifying patients with hypertension. *Open Med* [Internet] Open Medicine; 2007  
29 [cited 2017 Jan 16]; **1**: e18-26 Available from: <http://www.ncbi.nlm.nih.gov/pubmed/20101286>
- 30  
31 20. Juurlink D, Preyra C, Croxford R, Chong A, Austin P, Tu J LA. Canadian Institute for Health  
32 Information Discharge Abstract Database: A Validation Study [Internet]. 2006 Available from:  
33 [http://www.ices.on.ca/Publications/Atlases-and-Reports/2006/Canadian-Institute-for-Health-](http://www.ices.on.ca/Publications/Atlases-and-Reports/2006/Canadian-Institute-for-Health-Information)  
34 [Information](http://www.ices.on.ca/Publications/Atlases-and-Reports/2006/Canadian-Institute-for-Health-Information)
- 35  
36 21. Hux JE, Ivis F, Flintoft V, Bica A. Diabetes in Ontario: determination of prevalence and  
37 incidence using a validated administrative data algorithm. *Diabetes Care* [Internet] 2002 [cited  
38 2017 Jan 16]; **25**: 512–6 Available from: <http://www.ncbi.nlm.nih.gov/pubmed/11874939>
- 39  
40 22. Gershon AS, Wang C, Guan J, Vasilevska-Ristovska J, Cicutto L, To T. Identifying patients  
41 with physician-diagnosed asthma in health administrative databases. *Can Respir J* [Internet]  
42 2009; **16**: 183–8 Available from:  
43 [http://eutils.ncbi.nlm.nih.gov/entrez/eutils/elink.fcgi?dbfrom=pubmed&id=20011725&retmode=](http://eutils.ncbi.nlm.nih.gov/entrez/eutils/elink.fcgi?dbfrom=pubmed&id=20011725&retmode=ref&cmd=prlinks%5Cnpapers3://publication/uuid/D4C8EFBF-FC21-476C-AEB5-2F3A03DC757F)  
44 [ref&cmd=prlinks%5Cnpapers3://publication/uuid/D4C8EFBF-FC21-476C-AEB5-](http://eutils.ncbi.nlm.nih.gov/entrez/eutils/elink.fcgi?dbfrom=pubmed&id=20011725&retmode=ref&cmd=prlinks%5Cnpapers3://publication/uuid/D4C8EFBF-FC21-476C-AEB5-2F3A03DC757F)  
45 [2F3A03DC757F](http://eutils.ncbi.nlm.nih.gov/entrez/eutils/elink.fcgi?dbfrom=pubmed&id=20011725&retmode=ref&cmd=prlinks%5Cnpapers3://publication/uuid/D4C8EFBF-FC21-476C-AEB5-2F3A03DC757F)
- 46  
47 23. Schultz SE, Rothwell DM, Chen Z, Tu K. Identifying cases of congestive heart failure from  
48 administrative data: a validation study using primary care patient records. *Chronic Dis Inj Can*  
49 [Internet] 2013; **33**: 160–6 Available from:  
50 [http://www.ncbi.nlm.nih.gov/pubmed/23735455%5Cnhttp://eutils.ncbi.nlm.nih.gov/entrez/eutils](http://www.ncbi.nlm.nih.gov/pubmed/23735455%5Cnhttp://eutils.ncbi.nlm.nih.gov/entrez/eutils/elink.fcgi?dbfrom=pubmed&id=23735455&retmode=ref&cmd=prlinks%5Cnpapers3://publication/uuid/99905C17-4974-46A2-BCF2-8E07B3697602)  
51 [/elink.fcgi?dbfrom=pubmed&id=23735455&retmode=ref&cmd=prlinks%5Cnpapers3://publicat](http://www.ncbi.nlm.nih.gov/pubmed/23735455%5Cnhttp://eutils.ncbi.nlm.nih.gov/entrez/eutils/elink.fcgi?dbfrom=pubmed&id=23735455&retmode=ref&cmd=prlinks%5Cnpapers3://publication/uuid/99905C17-4974-46A2-BCF2-8E07B3697602)  
52 [ion/uuid/99905C17-4974-46A2-BCF2-8E07B3697602](http://www.ncbi.nlm.nih.gov/pubmed/23735455%5Cnhttp://eutils.ncbi.nlm.nih.gov/entrez/eutils/elink.fcgi?dbfrom=pubmed&id=23735455&retmode=ref&cmd=prlinks%5Cnpapers3://publication/uuid/99905C17-4974-46A2-BCF2-8E07B3697602)
- 53  
54  
55  
56  
57  
58  
59

- 1  
2  
3 24. Branch HA, Ministry O, Care L. Health Analyst ' s Toolkit. *Heal (San Fr* 2012; 1–110
- 4  
5 25. du Plessis V, Beshiri R, Bollman R, Clemenson H. Definitions of 'Rural'. *Agric. Rural Work.*  
6 *Pap. Ser.* 2002
- 7  
8 26. Sun LY, Tu J V., Eddeen AB, Liu PP. Prevalence and long-term survival after coronary artery  
9 bypass grafting in women and men with heart failure and preserved versus reduced ejection  
10 fraction. *J Am Heart Assoc* 2018; **7**: 1–14
- 11  
12 27. Development and evaluation of the Johns Hopkins University risk adjustment models for  
13 Medicare+Choice plan payment | Johns Hopkins ACG® System [Internet]. [cited 2020 Aug 24].  
14 Available from: [https://www.hopkinsacg.org/document/development-and-evaluation-of-the-](https://www.hopkinsacg.org/document/development-and-evaluation-of-the-johns-hopkins-university-risk-adjustment-models-for-medicarechoice-plan-payment/)  
15 [johns-hopkins-university-risk-adjustment-models-for-medicarechoice-plan-payment/](https://www.hopkinsacg.org/document/development-and-evaluation-of-the-johns-hopkins-university-risk-adjustment-models-for-medicarechoice-plan-payment/)  
16
- 17  
18 28. Sternberg SA, Bentur N, Abrams C, et al. Identifying frail older people using predictive  
19 modeling. *Am J Manag Care* [Internet] 2012 [cited 2019 Feb 6]; **18**: e392-7 Available from:  
20 <http://www.ncbi.nlm.nih.gov/pubmed/23145847>
- 21  
22 29. Tran DTT, Tu J V, Dupuis J-Y, Bader Eddeen A, Sun LY. Association of Frailty and Long-  
23 Term Survival in Patients Undergoing Coronary Artery Bypass Grafting. *J Am Heart Assoc*  
24 [Internet] 2018 [cited 2019 Jan 14]; **7** Available from:  
25 <https://www.ahajournals.org/doi/10.1161/JAHA.118.009882>
- 26  
27  
28 30. Corsini EM, Luc JGY, Mitchell KG, Turner NS, Vaporciyan AA, Antonoff MB. Predictors of  
29 the response of operating room personnel to surgeon behaviors. *Surg Today* [Internet] Springer  
30 Singapore; 2019; **49**: 927–35 Available from: <https://doi.org/10.1007/s00595-019-01829-2>
- 31  
32 31. Pattni N, Bould MD, Hayter MA, et al. Gender, power and leadership: the effect of a superior's  
33 gender on respiratory therapists' ability to challenge leadership during a life-threatening  
34 emergency. *BJA Br J Anaesth* [Internet] 2017; **119**: 697–702 Available from:  
35 [http://academic.oup.com/bja/article/119/4/697/4265674/Gender-power-and-leadership-the-](http://academic.oup.com/bja/article/119/4/697/4265674/Gender-power-and-leadership-the-effect-of-a)  
36 [effect-of-a](http://academic.oup.com/bja/article/119/4/697/4265674/Gender-power-and-leadership-the-effect-of-a)  
37
- 38  
39 32. Jones LK, Jennings BM, Higgins MK, de Waal FBM. Ethological observations of social  
40 behavior in the operating room. *Proc Natl Acad Sci* [Internet] 2018; **115**: 201716883 Available  
41 from: <http://www.pnas.org/lookup/doi/10.1073/pnas.1716883115>
- 42  
43 33. Tsugawa Y, Jena AB, Figueroa JF, Orav EJ, Blumenthal DM, Jha AK. Comparison of Hospital  
44 Mortality and Readmission Rates for Medicare Patients Treated by Male vs Female Physicians.  
45 *JAMA Intern Med* [Internet] 2016; **02138**: 1–8 Available from:  
46 <http://archinte.jamanetwork.com/article.aspx?doi=10.1001/jamainternmed.2016.7875>
- 47  
48  
49 34. Thomas W. Teaching and assessing surgical competence. *Ann R Coll Surg Engl* 2006; **88**: 429–  
50 32
- 51  
52 35. Birkmeyer NJO, Finks JF, Greenberg CK, et al. Safety culture and complications after bariatric  
53 surgery. *Ann Surg* [Internet] United States; 2013; **257**: 260–5 Available from:  
54 [http://ovidsp.ovid.com/ovidweb.cgi?T=JS&PAGE=reference&D=medl&NEWS=N&AN=23047](http://ovidsp.ovid.com/ovidweb.cgi?T=JS&PAGE=reference&D=medl&NEWS=N&AN=23047607)  
55 [607](http://ovidsp.ovid.com/ovidweb.cgi?T=JS&PAGE=reference&D=medl&NEWS=N&AN=23047607)  
56  
57  
58  
59

- 1  
2  
3 36. McCall L. The complexity of intersectionality. *J Women Cult Soc* 2005; **30**: 1771–800  
4  
5 37. Crenshaw K. Mapping the margins: Intersectionality, identity politics, and violence against  
6 women of color. *Stanford Law Rev* 1993; **43**: 1241–99  
7  
8  
9  
10  
11  
12  
13  
14  
15  
16  
17  
18  
19  
20  
21  
22  
23  
24  
25  
26  
27  
28  
29  
30  
31  
32  
33  
34  
35  
36  
37  
38  
39  
40  
41  
42  
43  
44  
45  
46  
47  
48  
49  
50  
51  
52  
53  
54  
55  
56  
57  
58  
59  
60

For peer review only

## TABLES

Table 1. Patient characteristics by surgeon-anaesthesiologist sex discordance in all cardiac surgery patients.

| Variable                                     | Discordant<br>(n=19,893) | Concordant<br>(n=59,969) | Standardized<br>Difference | P-value |
|----------------------------------------------|--------------------------|--------------------------|----------------------------|---------|
| Age, mean ± SD, yr                           | 66.3 ± 10.4              | 66.4 ± 10.4              | 0                          | 0.76    |
| Female Sex, n (%)                            | 4,678 (23.5)             | 14,010 (23.4)            | 0                          | 0.66    |
| Income Quintile, n (%)                       |                          |                          |                            |         |
| 1                                            | 3,762 (18.9)             | 11,771 (19.6)            | 0.02                       | 0.01    |
| 2                                            | 3,966 (19.9)             | 12,374 (20.6)            | 0.02                       |         |
| 3                                            | 4,162 (20.9)             | 12,226 (20.4)            | 0.01                       |         |
| 4                                            | 4,052 (20.4)             | 11,970 (20.0)            | 0.01                       |         |
| 5                                            | 3,951 (19.9)             | 11,628 (19.4)            | 0.01                       |         |
| Rural Residence, n (%)                       | 17,212 (86.5)            | 50,595 (84.4)            | 0.06                       | <0.001  |
| Hospital type, n (%)                         |                          |                          |                            |         |
| Community                                    | 6,236 (31.3)             | 18,104 (30.2)            | 0.03                       | 0.002   |
| Teaching                                     | 13,657 (68.7)            | 41,865 (69.8)            | 0.03                       |         |
| Hypertension, n (%)                          | 17,203 (86.5)            | 51,845 (86.5)            | 0                          | 0.93    |
| Atrial fibrillation, n (%)                   | 1,256 (6.3)              | 3,830 (6.4)              | 0                          | 0.72    |
| Recent MI within 30 days, n (%)              | 5,002 (25.1)             | 15,047 (25.1)            | 0                          | 0.88    |
| Remote MI, n (%)                             | 4,129 (20.8)             | 13,003 (21.7)            | 0.02                       | 0.006   |
| Previous PCI, n (%)                          | 3,048 (15.3)             | 9,161 (15.3)             | 0                          | 0.88    |
| Left ventricular ejection fraction, n (%)    |                          |                          |                            |         |
| ≥ 50                                         | 13,768 (69.2)            | 41,267 (68.8)            | 0.01                       | 0.37    |
| 35-49                                        | 4,257 (21.4)             | 12,841 (21.4)            | 0                          |         |
| 20-35                                        | 1,591 (8.0)              | 4,949 (8.3)              | 0.01                       |         |
| < 20                                         | 277 (1.4)                | 912 (1.5)                | 0.01                       |         |
| Heart failure, n (%)                         | 4,703 (23.6)             | 14,697 (24.5)            | 0.02                       | 0.01    |
| Peripheral arterial disease, n (%)           | 2,334 (11.7)             | 7,040 (11.7)             | 0                          | 0.98    |
| Cerebrovascular disease n (%)                | 1,952 (9.8)              | 5,887 (9.8)              | 0                          | 0.99    |
| Dementia, n (%)                              | 31 (0.2)                 | 132 (0.2)                | 0.01                       | 0.08    |
| Depression, n (%)                            | 300 (1.5)                | 814 (1.4)                | 0.01                       | 0.12    |
| Psychosis, n (%)                             | 31 (0.2)                 | 132 (0.2)                | 0.01                       | 0.08    |
| Smoking status, n (%)                        |                          |                          |                            |         |
| Never                                        | 8,759 (44.0)             | 26,942 (44.9)            | 0.02                       | 0.001   |
| Current                                      | 3,852 (19.4)             | 11,922 (19.9)            | 0.01                       |         |
| Former                                       | 7,282 (36.6)             | 21,105 (35.2)            | 0.03                       |         |
| Chronic obstructive pulmonary disease, n (%) | 5,705 (28.7)             | 17,303 (28.9)            | 0                          | 0.64    |
| Pulmonary circulation disorder, n (%)        | 387 (1.9)                | 1,195 (2.0)              | 0                          | 0.68    |
| Serum creatinine (µmol/L), n (%)             |                          |                          |                            |         |
| <120                                         | 17,529 (88.1)            | 52,151 (87.0)            | 0.03                       | <0.001  |
| 120-179                                      | 1,736 (8.7)              | 5,670 (9.5)              | 0.03                       |         |
| ≥180                                         | 628 (3.2)                | 2,148 (3.6)              | 0.02                       |         |
| Dialysis, n (%)                              | 384 (1.9)                | 1,298 (2.2)              | 0.02                       | 0.05    |
| Diabetes, n (%)                              | 8,994 (45.2)             | 27,182 (45.3)            | 0                          | 0.78    |
| Hypothyroidism, n (%)                        | 406 (2.0)                | 1,004 (1.7)              | 0.03                       | <0.001  |
| Morbid obesity, n (%)                        | 9,471 (47.6)             | 25,824 (43.1)            | 0.09                       | <0.001  |
| Primary cancer, n (%)                        | 980 (4.9)                | 2,928 (4.9)              | 0                          | 0.80    |
| Metastatic cancer, n (%)                     | 96 (0.5)                 | 285 (0.5)                | 0                          | 0.90    |
| Anemia, n (%)                                | 2,079 (10.5)             | 6,027 (10.1)             | 0.01                       | 0.11    |
| Venous thromboembolism, n (%)                | 82 (0.4)                 | 214 (0.4)                | 0.01                       | 0.27    |
| Liver disease, n (%)                         | 179 (0.9)                | 510 (0.9)                | 0.01                       | 0.51    |
| Alcohol abuse, n (%)                         | 303 (1.5)                | 835 (1.4)                | 0.01                       | 0.18    |

|                                     |               |               |      |        |
|-------------------------------------|---------------|---------------|------|--------|
| Frailty, n (%)                      | 2,902 (14.6)  | 9,683 (16.1)  | 0.04 | <0.001 |
| Surgery type, n (%)                 |               |               |      |        |
| CABG                                | 15,672 (78.8) | 46,842 (78.1) | 0.02 | 0.05   |
| Single valve                        | 2,244 (11.3)  | 6,708 (11.2)  | 0    |        |
| Multiple valves                     | 283 (1.4)     | 923 (1.5)     | 0.01 |        |
| CABG + single valve                 | 1,583 (8.0)   | 5,122 (8.5)   | 0.02 |        |
| CABG + multiple valves              | 111 (0.6)     | 374 (0.6)     | 0.01 |        |
| Redo sternotomy, n (%)              | 460 (2.3)     | 1,695 (2.8)   | 0.03 | <0.001 |
| Emergent surgery, n (%)             | 1,197 (6.0)   | 3,674 (6.1)   | 0    | 0.58   |
| Surgery duration, median (IQR), min | 273 (232-320) | 260 (220-307) | 0.2  | <0.001 |

Abbreviations: SD = standard deviation; MI = myocardial infarction; PCI = percutaneous coronary intervention; CABG = coronary artery bypass grafting; IQR = interquartile range



**Table 2. Physician characteristics by patient sex.**

| Variable                                | Female patients<br>(n=18,688) | Male patients<br>(n=61,174) | Standardized<br>Difference | P-<br>value |
|-----------------------------------------|-------------------------------|-----------------------------|----------------------------|-------------|
| Surgeon age, mean ± SD, yr              | 50.2 ± 8.8                    | 49.9 ± 8.8                  | 0.03                       | <0.001      |
| Surgeon experience, yr, n (%)           |                               |                             |                            |             |
| <10                                     | 1,186 (6.3)                   | 4,153 (6.8)                 | 0.02                       | <0.001      |
| 11-20                                   | 4,791 (25.6)                  | 16,336 (26.7)               | 0.02                       |             |
| 21-30                                   | 7,144 (38.2)                  | 23,313 (38.1)               | 0                          |             |
| >30                                     | 5,567 (29.8)                  | 17,372 (28.4)               | 0.03                       |             |
| Surgeon volume, median (IQR).           | 2,942 (1,209-<br>4,366)       | 2,842 (1,126-<br>4,322)     | 0.04                       | <0.001      |
| Anaesthesiologist age, mean ± SD, yr    | 48.3 ± 9.0                    | 48.3 ± 9.0                  | 0                          | 0.84        |
| Anaesthesiologist experience, yr, n (%) |                               |                             |                            |             |
| 0-10                                    | 1,626 (8.7)                   | 5,563 (9.1)                 | 0.01                       | 0.04        |
| 11-20                                   | 6,737 (36.0)                  | 21,877 (35.8)               | 0.01                       |             |
| 21-30                                   | 6,005 (32.1)                  | 19,171 (31.3)               | 0.02                       |             |
| >30                                     | 4,320 (23.1)                  | 14,563 (23.8)               | 0.02                       |             |
| Anaesthesiologist volume, median (IQR)  | 764 (368-1,311)               | 758 (366-1,318)             | 0.01                       | 0.54        |

Abbreviations: SD = standard deviation; PCI = percutaneous coronary intervention; IQR = interquartile range  
Total case volumes reflect the number of cases performed since 1991 until the date of the index procedure.

**Table 3. Thirty-day patient outcomes by physician sex discordance.**

| Variable                                    | Discordant<br>(n=19,893) | Concordant<br>(n=59,969) | Standardized<br>Difference | P-value |
|---------------------------------------------|--------------------------|--------------------------|----------------------------|---------|
| Mortality, n (%)                            | 335 (1.7)                | 1,052 (1.8)              | 0.01                       | 0.51    |
| MACE, n (%)                                 | 678 (3.4)                | 2,247 (3.7)              | 0.02                       | 0.03    |
| Hospital length of stay, median (IQR), days | 7 (6-9)                  | 7 (6-9)                  | 0.03                       | <0.001  |
| ICU length of stay, median (IQR), days      | 2 (2-4)                  | 2 (2-4)                  | 0.06                       | <0.001  |

Abbreviations: MACE = major adverse cardiovascular events; ICU = intensive care unit, IQR = interquartile range

**Table 4. Predictors of all-cause patient mortality at 30 days, by surgeon-anaesthesiologist sex discordance.**

| Variable                                | Adjusted OR (95% CI) | P-value   |
|-----------------------------------------|----------------------|-----------|
| Physician characteristics               |                      |           |
| Physician sex discordance               | 0.93 (0.80-1.07)     | 0.30      |
| Surgeon experience, yr                  |                      |           |
| <10                                     | Reference            | Reference |
| 11-20                                   | 1.24 (0.93-1.66)     | 0.14      |
| 21-30                                   | 1.07 (0.76-1.51)     | 0.71      |
| >30                                     | 1.26 (0.83-1.91)     | 0.28      |
| Surgeon volume, per 100 cases           | 1.00 (0.99-1.01)     | 0.55      |
| Anaesthesiologist volume, per 100 cases | 1.00 (0.99-1.02)     | 0.79      |
| Anaesthesiologist experience, yr        |                      |           |
| <10                                     | Reference            | Reference |
| 11-20                                   | 1.15 (0.92-1.45)     | 0.22      |
| 21-30                                   | 1.01 (0.78-1.31)     | 0.93      |
| >30                                     | 1.03 (0.78-1.37)     | 0.82      |
| Patient characteristics                 |                      |           |
| Patient age, per 10 yr                  | 1.69 (1.57-1.80)     | <0.001    |
| Female patient sex                      | 1.56 (1.37-1.77)     | <0.001    |
| Income quintile                         |                      |           |
| 1                                       | 1.44 (1.20-1.73)     | <0.001    |
| 2                                       | 1.24 (1.03-1.48)     | 0.03      |
| 3                                       | 1.19 (0.99-1.44)     | 0.07      |
| 4                                       | 1.09 (0.90-1.33)     | 0.36      |
| 5                                       | Reference            | Reference |
| Rural residence                         | 0.95 (0.81-1.12)     | 0.57      |
| Community hospital                      | 1.24 (0.81-1.91)     | 0.33      |
| Hypertension                            | 1.01 (0.81-1.25)     | 0.95      |
| Atrial fibrillation                     | 1.14 (0.97-1.35)     | 0.11      |
| Recent MI within 30 days                | 1.39 (1.20-1.61)     | <0.001    |
| Remote MI                               | 1.24 (1.07-1.44)     | 0.006     |
| Previous PCI                            | 1.03 (0.88-1.21)     | 0.70      |
| Left ventricular ejection fraction      |                      |           |
| ≥ 50                                    | Reference            | Reference |
| 35-49                                   | 1.23 (1.07-1.42)     | 0.004     |
| 20-35                                   | 1.72 (1.46-2.04)     | <0.001    |
| < 20                                    | 2.52 (1.91-3.32)     | <0.001    |
| Heart failure                           | 1.90 (1.67-2.17)     | <0.001    |
| Peripheral arterial disease             | 1.45 (1.26-1.67)     | <0.001    |
| Cerebrovascular disease                 | 1.37 (1.19-1.59)     | <0.001    |
| Dementia                                | 2.46 (1.37-4.41)     | 0.003     |
| Depression                              | 0.97 (0.66-1.42)     | 0.86      |

|    |                                        |                  |           |
|----|----------------------------------------|------------------|-----------|
| 1  |                                        |                  |           |
| 2  |                                        |                  |           |
| 3  | Psychosis                              | 1.42 (0.56-3.60) | 0.46      |
| 4  | Smoking status                         |                  |           |
| 5  | Never                                  | Reference        | Reference |
| 6  | Current                                | 1.01 (0.84-1.20) | 0.96      |
| 7  | Former                                 | 1.01 (0.89-1.15) | 0.87      |
| 8  | Chronic obstructive pulmonary disease  | 1.33 (1.18-1.49) | <0.001    |
| 9  | Pulmonary circulatory disorder         | 1.68 (1.33-2.13) | <0.001    |
| 10 | Serum creatinine ( $\mu\text{mol/L}$ ) |                  |           |
| 11 | <120                                   | Reference        | Reference |
| 12 | 120-179                                | 1.67 (1.44-1.94) | <0.001    |
| 13 | $\geq 180$                             | 2.78 (2.23-3.45) | <0.001    |
| 14 | Dialysis                               | 1.14 (0.86-1.50) | 0.37      |
| 15 | Diabetes                               | 0.96 (0.85-1.08) | 0.49      |
| 16 | Hypothyroidism                         | 0.75 (0.52-1.08) | 0.12      |
| 17 | Morbid obesity                         | 0.97 (0.86-1.09) | 0.61      |
| 18 | Primary cancer                         | 0.97 (0.77-1.22) | 0.81      |
| 19 | Metastatic cancer                      | 1.16 (0.59-2.31) | 0.66      |
| 20 | Anemia                                 | 1.25 (1.08-1.45) | 0.002     |
| 21 | Venous thromboembolism                 | 1.39 (0.80-2.44) | 0.25      |
| 22 | Liver disease                          | 1.45 (0.94-2.25) | 0.09      |
| 23 | Alcohol abuse                          | 1.21 (0.80-1.81) | 0.37      |
| 24 | Frailty                                | 0.82 (0.71-0.95) | 0.01      |
| 25 | Redo sternotomy                        | 1.10 (0.87-1.40) | 0.44      |
| 26 | Emergent surgery                       | 2.91 (2.49-3.39) | <0.001    |
| 27 | Complex surgery                        | 1.32 (1.14-1.53) | 0.0002    |
| 28 | Surgery duration, per 10 min           | 1.07 (1.07-1.08) | <0.001    |
| 29 |                                        |                  |           |

Abbreviations: MI = myocardial infarction; PCI = percutaneous coronary intervention

Total case volumes reflect the number of cases performed since 1991 until the date of the index procedure.

## Supplemental Figure 1. Cohort flow diagram

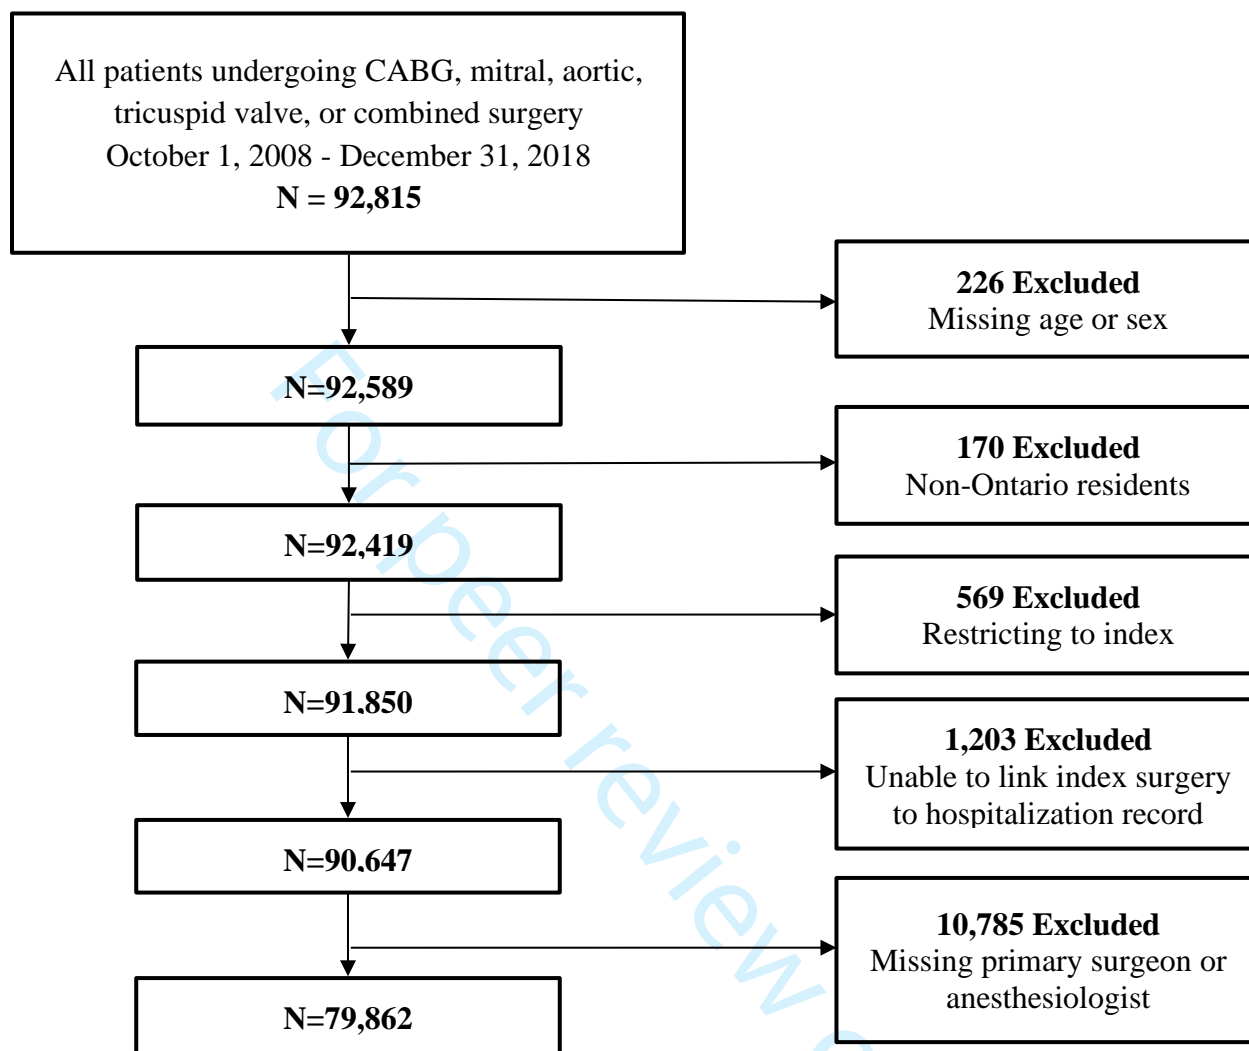

Abbreviation: CABG = coronary artery bypass surgery

**Supplemental Table 1. Thirty-day outcomes in patients who underwent CABG, by physician sex discordance.**

| Variable                                    | Discordant<br>(n=19,893) | Concordant<br>(n=59,969) | Standardized Difference | P-value |
|---------------------------------------------|--------------------------|--------------------------|-------------------------|---------|
| Mortality, n (%)                            | 205 (1.3)                | 654 (1.4)                | 0.01                    | 0.41    |
| MACE, n (%)                                 | 524 (3.3)                | 1,692 (3.6)              | 0.01                    | 0.12    |
| Hospital length of stay, median (IQR), days | 7 (6-9)                  | 7 (6-9)                  | 0.03                    | 0.007   |
| ICU length of stay, median (IQR), days      | 2 (2-3)                  | 2 (2-3)                  | 0.07                    | <0.001  |

Abbreviations: MACE = major adverse cardiovascular events; ICU = intensive care unit, IQR = interquartile range

**Supplemental Table 2. Adjusted associations between surgeon-anaesthesiologist sex discordance and CABG outcomes at 30 days.**

| <b>Outcome</b>          | <b>Adjusted measure (95% CI)</b> | <b>P-value</b> |
|-------------------------|----------------------------------|----------------|
| Mortality               | OR: 0.88 (0.74-1.05)             | 0.16           |
| MACE                    | OR: 0.99 (0.98-1.11)             | 0.40           |
| Hospital length of stay | RR: 1.00 (0.99-1.02)             | 0.70           |
| ICU length of stay      | RR: 0.99 (0.98-1.00)             | 0.09           |

Abbreviations: MACE = major adverse cardiovascular events; ICU = intensive care unit; OR = odds ratio; RR = risk ratio; CI = confidence interval

peer review only

**Supplemental Table 3. Predictors of major adverse cardiovascular events at 30 days in the overall cohort, by surgeon-anaesthesiologist sex discordance.**

| Variable                                  | Adjusted OR (95% CI) | P-value   |
|-------------------------------------------|----------------------|-----------|
| <b>Physician characteristics</b>          |                      |           |
| Physician sex discordance                 | 0.96 (0.87-1.06)     | 0.40      |
| <b>Surgeon experience, yr</b>             |                      |           |
| <10                                       | Reference            | Reference |
| 11-20                                     | 0.91 (0.76-1.10)     | 0.33      |
| 21-30                                     | 0.97 (0.77-1.22)     | 0.79      |
| >30                                       | 1.04 (0.78-1.37)     | 0.80      |
| Surgeon volume, per 100 cases             | 1.00 (1.00-1.01)     | 0.71      |
| Anaesthesiologist volume, per 100 cases   | 1.00 (0.99-1.01)     | 0.74      |
| <b>Anaesthesiologist experience, yr</b>   |                      |           |
| <10                                       | Reference            | Reference |
| 11-20                                     | 1.12 (0.97-1.31)     | 0.13      |
| 21-30                                     | 1.13 (0.95-1.33)     | 0.17      |
| >30                                       | 1.06 (0.87-1.28)     | 0.57      |
| <b>Patient characteristics</b>            |                      |           |
| Patient age, per 10 yr                    | 1.30 (1.25-1.36)     | <0.001    |
| Female patient sex                        | 1.45 (1.33-1.58)     | <0.001    |
| <b>Income quintile</b>                    |                      |           |
| 1                                         | 1.07 (0.95-1.21)     | 0.27      |
| 2                                         | 1.15 (1.02-1.30)     | 0.02      |
| 3                                         | 1.04 (0.92-1.17)     | 0.58      |
| 4                                         | 1.01 (0.89-1.14)     | 0.89      |
| 5                                         | Reference            | Reference |
| Rural residence                           | 0.99 (0.89-1.10)     | 0.83      |
| Community hospital                        | 0.79 (0.61-1.02)     | 0.08      |
| Hypertension                              | 1.12(0.97-1.28)      | 0.12      |
| Atrial fibrillation                       | 1.18 (1.04-1.34)     | 0.00      |
| Recent MI within 30 days                  | 1.98 (1.80-2.18)     | <0.001    |
| Remote MI                                 | 1.47 (1.32-1.63)     | <0.001    |
| Previous PCI                              | 0.93 (0.83-1.03)     | 0.16      |
| <b>Left ventricular ejection fraction</b> |                      |           |
| ≥ 50                                      | Reference            | Reference |
| 35-49                                     | 1.08 (0.98-1.19)     | 0.11      |
| 20-35                                     | 1.18 (1.04-1.34)     | 0.01      |
| < 20                                      | 1.10 (0.84-1.44)     | 0.49      |
| Heart failure                             | 1.42 (1.30-1.55)     | <0.001    |
| Peripheral arterial disease               | 1.32 (1.20-1.47)     | <0.001    |



|    |                                       |                  |           |
|----|---------------------------------------|------------------|-----------|
| 1  |                                       |                  |           |
| 2  |                                       |                  |           |
| 3  |                                       |                  |           |
| 4  | Cerebrovascular disease               | 1.36 (1.22-1.51) | <0.001    |
| 5  | Dementia                              | 1.05 (0.59-1.89) | 0.86      |
| 6  | Depression                            | 1.20 (0.93-1.55) | 0.16      |
| 7  | Psychosis                             | 0.87 (0.40-1.88) | 0.72      |
| 8  |                                       |                  |           |
| 9  | Smoking status                        |                  |           |
| 10 | Never                                 | Reference        | Reference |
| 11 | Current                               | 1.05 (0.93-1.17) | 0.43      |
| 12 | Former                                | 1.02 (0.93-1.11) | 0.73      |
| 13 |                                       |                  |           |
| 14 | Chronic obstructive pulmonary disease | 1.04 (0.95-1.12) | 0.41      |
| 15 | Pulmonary circulatory disorder        | 1.22 (0.99-1.51) | 0.06      |
| 16 |                                       |                  |           |
| 17 | Serum creatinine (µmol/L)             |                  |           |
| 18 | <120                                  | Reference        | Reference |
| 19 | 120-179                               | 1.16 (1.03-1.30) | 0.01      |
| 20 | ≥180                                  | 1.23 (1.01-1.49) | 0.04      |
| 21 |                                       |                  |           |
| 22 | Dialysis                              | 1.21 (0.95-1.55) | 0.12      |
| 23 | Diabetes                              | 1.02 (0.94-1.10) | 0.65      |
| 24 | Hypothyroidism                        | 0.95 (0.75-1.21) | 0.67      |
| 25 | Morbid obesity                        | 1.12 (1.03-1.22) | 0.01      |
| 26 | Primary cancer                        | 0.93 (0.79-1.10) | 0.40      |
| 27 | Metastatic cancer                     | 1.02 (0.94-1.10) | 0.95      |
| 28 | Anemia                                | 1.23 (1.10-1.37) | 0.0002    |
| 29 | Venous thromboembolism                | 0.64 (0.35-1.17) | 0.15      |
| 30 | Liver disease                         | 1.00 (0.69-1.44) | 0.10      |
| 31 | Alcohol abuse                         | 1.28 (0.97-1.68) | 0.08      |
| 32 | Frailty                               | 1.07 (0.97-1.18) | 0.17      |
| 33 | Redo sternotomy                       | 1.44 (1.19-1.73) | 0.0001    |
| 34 | Emergent surgery                      | 1.68 (1.48-1.90) | <0.001    |
| 35 | Complex surgery                       | 1.17 (1.04-1.32) | 0.01      |
| 36 | Surgery duration, per 10 min          | 1.02 (1.01-1.02) | <0.001    |
| 37 |                                       |                  |           |
| 38 |                                       |                  |           |
| 39 |                                       |                  |           |
| 40 |                                       |                  |           |
| 41 |                                       |                  |           |
| 42 |                                       |                  |           |

Abbreviations: MI = myocardial infarction; PCI = percutaneous coronary intervention

Total case volumes reflect the number of cases performed since 1991 until the date of the index procedure.

**Supplemental Table 4a. Predictors of intensive care unit length of stay in the overall cohort, by surgeon-anaesthesiologist sex discordance.**

| Variable                                | Rate Ratio (95% CI) | P-value   |
|-----------------------------------------|---------------------|-----------|
| <b>Physician characteristics</b>        |                     |           |
| Physician sex discordance               | 0.99 (0.98-1.01)    | 0.52      |
| <b>Surgeon experience, yr</b>           |                     |           |
| <10                                     | Reference           | Reference |
| 11-20                                   | 0.99 (0.97-1.02)    | 0.65      |
| 21-30                                   | 1.02 (0.99-1.06)    | 0.14      |
| >30                                     | 1.02 (0.98-1.06)    | 0.24      |
| Surgeon volume, per 100 cases           | 1.00 (1.00-1.00)    | 0.33      |
| <b>Anaesthesiologist experience, yr</b> |                     |           |
| 0-10                                    | Reference           | Reference |
| 11-20                                   | 0.98 (0.96-1.00)    | 0.04      |
| 21-30                                   | 0.99 (0.97-1.02)    | 0.51      |
| >30                                     | 1.00 (0.97-1.03)    | 0.89      |
| Anaesthesiologist volume, per 100 cases | 1.00 (1.00-1.00)    | 0.71      |
| Surgery duration                        | 1.02 (1.02-1.02)    | <0.001    |
| <b>Patient characteristics</b>          |                     |           |
| Patient age, yr                         | 1.09 (1.08-1.09)    | <0.001    |
| Female patient sex                      | 1.07 (1.06-1.08)    | <0.001    |
| <b>Income quintile</b>                  |                     |           |
| 1                                       | 1.05 (1.04-1.07)    | <0.001    |
| 2                                       | 1.03 (1.02-1.04)    | <0.001    |
| 3                                       | 1.03 (1.02-1.04)    | <0.001    |
| 4                                       | 1.01 (1.00-1.02)    | 0.17      |
| 5                                       | Reference           | Reference |
| Rural residence                         | 0.98 (0.97-0.99)    | 0.00      |
| Community hospital                      | 0.98 (0.86-1.13)    | 0.82      |
| Hypertension                            | 0.96 (0.95-0.97)    | <0.001    |
| Atrial fibrillation                     | 1.06 (1.04-1.07)    | <0.001    |
| Recent MI within 30 days                | 1.02 (1.01-1.03)    | 0.00      |
| Remote MI                               | 1.00 (0.99-1.01)    | 0.69      |

|    |                                       |                  |           |
|----|---------------------------------------|------------------|-----------|
| 1  |                                       |                  |           |
| 2  |                                       |                  |           |
| 3  | Previous PCI                          | 1.00 (0.99-1.01) | 0.70      |
| 4  | Left ventricular ejection fraction    |                  |           |
| 5  | ≥ 50%                                 | Reference        | Reference |
| 6  | 35-49%                                | 1.03 (1.02-1.04) | <0.001    |
| 7  | 20-35%                                | 1.11 (1.10-1.13) | <0.001    |
| 8  | < 20%                                 | 1.21 (1.18-1.24) | <0.001    |
| 9  | Heart failure                         | 1.21 (1.20-1.22) | <0.001    |
| 10 | Peripheral arterial disease           | 1.05 (1.04-1.06) | <0.001    |
| 11 | Cerebrovascular disease               | 1.04 (1.03-1.05) | <0.001    |
| 12 | Dementia                              | 1.02 (0.95-1.09) | 0.54      |
| 13 | Depression                            | 1.18 (1.15-1.22) | <0.001    |
| 14 | Psychosis                             | 1.03 (0.96-1.11) | 0.39      |
| 15 | Smoking status                        |                  |           |
| 16 | Never                                 | Reference        | Reference |
| 17 | Current                               | 1.02 (1.01-1.03) | <0.001    |
| 18 | Former                                | 1.00 (0.99-1.01) | 1.00      |
| 19 | Chronic obstructive pulmonary disease | 1.05 (1.04-1.06) | <0.001    |
| 20 | Pulmonary circulatory disorder        | 1.23 (1.21-1.26) | <0.001    |
| 21 | Serum creatinine (μmol/L)             |                  |           |
| 22 | <120                                  | Reference        | Reference |
| 23 | 120-179                               | 1.16 (1.15-1.18) | <0.001    |
| 24 | ≥180                                  | 1.33 (1.31-1.36) | <0.001    |
| 25 | Dialysis                              | 1.06 (1.04-1.09) | <0.001    |
| 26 | Diabetes                              | 1.03 (1.02-1.03) | <0.001    |
| 27 | Hypothyroidism                        | 1.01 (0.98-1.03) | 0.60      |
| 28 | Morbid obesity                        | 0.99 (0.98-1.00) | 0.02      |
| 29 | Primary cancer                        | 1.00 (0.99-1.02) | 0.72      |
| 30 | Metastatic cancer                     | 0.99 (0.94-1.04) | 0.62      |
| 31 | Anemia                                | 1.15 (1.14-1.16) | <0.001    |
| 32 | Venous thromboembolism                | 0.94 (0.89-0.99) | 0.02      |
| 33 | Liver disease                         | 1.09 (1.05-1.12) | <0.001    |
| 34 | Alcohol abuse                         | 1.10 (1.07-1.14) | <0.001    |
| 35 | Frailty                               | 1.09 (1.08-1.10) | <0.001    |
| 36 | Complex surgery                       | 1.15 (1.14-1.17) | <0.001    |
| 37 |                                       |                  |           |
| 38 |                                       |                  |           |
| 39 |                                       |                  |           |
| 40 |                                       |                  |           |
| 41 |                                       |                  |           |
| 42 |                                       |                  |           |
| 43 |                                       |                  |           |
| 44 |                                       |                  |           |
| 45 |                                       |                  |           |
| 46 |                                       |                  |           |
| 47 |                                       |                  |           |

|   |                  |                  |        |
|---|------------------|------------------|--------|
| 1 |                  |                  |        |
| 2 |                  |                  |        |
| 3 | Redo sternotomy  | 0.97 (0.95-0.99) | 0.00   |
| 4 | Emergent surgery | 1.46 (1.44-1.48) | <0.001 |
| 5 | <hr/>            |                  |        |

6 Abbreviations: MI = myocardial infarction; PCI = percutaneous coronary intervention  
7 Total case volumes reflect the number of cases performed since 1991 until the date of the index procedure.  
8  
9

10  
11  
12  
13  
14  
15  
16  
17  
18  
19  
20  
21  
22  
23  
24  
25  
26  
27  
28  
29  
30  
31  
32  
33  
34  
35  
36  
37  
38  
39  
40  
41  
42  
43  
44  
45  
46  
47

For peer review only

**Supplemental Table 4b. Predictors of hospital length of stay in the overall cohort, by surgeon-anaesthesiologist sex discordance.**

| Variable                                | Rate Ratio (95% CI) | P-value   |
|-----------------------------------------|---------------------|-----------|
| Physician characteristics               |                     |           |
| Physician sex discordance               | 0.99 (0.98-1.00)    | 0.03      |
| Surgeon experience, yr                  |                     |           |
| <10                                     | Reference           | Reference |
| 11-20                                   | 0.99 (0.98-1.01)    | 0.35      |
| 21-30                                   | 1.01 (0.99-1.03)    | 0.41      |
| >30                                     | 1.01 (0.98-1.03)    | 0.65      |
| Surgeon volume, per 100 cases           | 1.00 (1.00-1.00)    | <.0001    |
| Anaesthesiologist experience, yr        |                     |           |
| 0-10                                    | Reference           | Reference |
| 11-20                                   | 0.99 (0.98-1.00)    | 0.03      |
| 21-30                                   | 0.98 (0.97-1.00)    | 0.03      |
| >30                                     | 0.97 (0.96-0.99)    | 0.00      |
| Anaesthesiologist volume, per 100 cases | 1.00 (1.00-1.00)    | 0.01      |
| Surgery duration                        | 1.01 (1.01-1.01)    | <.0001    |
| Patient characteristics                 |                     |           |
| Patient age, yr                         | 1.11 (1.10-1.11)    | <.0001    |
| Female patient sex                      | 1.11 (1.10-1.12)    | <.0001    |
| Income quintile                         |                     |           |
| 1                                       | 1.07 (1.06-1.08)    | <.0001    |
| 2                                       | 1.04 (1.03-1.04)    | <.0001    |
| 3                                       | 1.03 (1.02-1.03)    | <.0001    |
| 4                                       | 1.01 (1.01-1.02)    | 0.0002    |
| 5                                       | Reference           | Reference |
| Rural residence                         | 1.00 (0.99-1.00)    | 0.15      |
| Community hospital                      | 1.02 (0.92-1.12)    | 0.71      |
| Hypertension                            | 0.98 (0.97-0.99)    | <.0001    |
| Atrial fibrillation                     | 1.06 (1.05-1.07)    | <.0001    |
| Recent MI within 30 days                | 1.02 (1.02-1.03)    | <.0001    |
| Remote MI                               | 1.00 (0.99-1.01)    | 0.80      |
| Previous PCI                            | 0.97 (0.97-0.98)    | <.0001    |
| Left ventricular ejection fraction      |                     |           |
| ≥ 50%                                   | Reference           | Reference |
| 35-49%                                  | 1.02 (1.01-1.03)    | <.0001    |
| 20-35%                                  | 1.06 (1.05-1.06)    | <.0001    |
| < 20%                                   | 1.10 (1.08-1.12)    | <.0001    |
| Heart failure                           | 1.17 (1.16-1.18)    | <.0001    |
| Peripheral arterial disease             | 1.04 (1.04-1.05)    | <.0001    |
| Cerebrovascular disease                 | 1.06 (1.05-1.07)    | <.0001    |
| Dementia                                | 1.03 (0.99-1.08)    | 0.10      |

|    |                                                                                           |                  |           |
|----|-------------------------------------------------------------------------------------------|------------------|-----------|
| 1  |                                                                                           |                  |           |
| 2  |                                                                                           |                  |           |
| 3  | Depression                                                                                | 1.19 (1.17-1.21) | <.0001    |
| 4  | Psychosis                                                                                 | 1.22 (1.17-1.27) | <.0001    |
| 5  | Smoking status                                                                            |                  |           |
| 6  | Never                                                                                     | Reference        | Reference |
| 7  | Current                                                                                   | 1.00 (0.99-1.00) | 0.20      |
| 8  | Former                                                                                    | 1.00 (0.99-1.00) | 0.63      |
| 9  | Chronic obstructive pulmonary disease                                                     | 1.06 (1.05-1.06) | <.0001    |
| 10 | Pulmonary circulatory disorder                                                            | 1.14 (1.13-1.16) | <.0001    |
| 11 | Serum creatinine ( $\mu\text{mol/L}$ )                                                    |                  |           |
| 12 | <120                                                                                      | Reference        | Reference |
| 13 | 120-179                                                                                   | 1.10 (1.09-1.11) | <.0001    |
| 14 | $\geq 180$                                                                                | 1.25 (1.23-1.27) | <.0001    |
| 15 | Dialysis                                                                                  | 1.11 (1.09-1.13) | <.0001    |
| 16 | Diabetes                                                                                  | 1.03 (1.03-1.04) | <.0001    |
| 17 | Hypothyroidism                                                                            | 1.01 (1.00-1.03) | 0.13      |
| 18 | Morbid obesity                                                                            | 1.00 (0.99-1.00) | 0.29      |
| 19 | Primary cancer                                                                            | 1.02 (1.01-1.03) | 0.0003    |
| 20 | Metastatic cancer                                                                         | 1.00 (0.97-1.04) | 0.83      |
| 21 | Anemia                                                                                    | 1.14 (1.13-1.15) | <.0001    |
| 22 | Venous thromboembolism                                                                    | 1.01 (0.98-1.04) | 0.60      |
| 23 | Liver disease                                                                             | 1.06 (1.04-1.09) | <.0001    |
| 24 | Alcohol abuse                                                                             | 1.07 (1.05-1.09) | <.0001    |
| 25 | Frailty                                                                                   | 1.15 (1.14-1.16) | <.0001    |
| 26 | Complex surgery                                                                           | 1.13 (1.12-1.13) | <.0001    |
| 27 | Redo sternotomy                                                                           | 0.95 (0.94-0.96) | <.0001    |
| 28 | Emergent surgery                                                                          | 1.22 (1.21-1.24) | <.0001    |
| 29 |                                                                                           |                  |           |
| 30 |                                                                                           |                  |           |
| 31 |                                                                                           |                  |           |
| 32 |                                                                                           |                  |           |
| 33 |                                                                                           |                  |           |
| 34 |                                                                                           |                  |           |
| 35 |                                                                                           |                  |           |
| 36 | Abbreviations: MI = myocardial infarction; PCI = percutaneous coronary intervention       |                  |           |
| 37 | Total case volumes reflect the number of cases performed since 1991 until the date of the |                  |           |
| 38 | index procedure.                                                                          |                  |           |
| 39 |                                                                                           |                  |           |
| 40 |                                                                                           |                  |           |
| 41 |                                                                                           |                  |           |
| 42 |                                                                                           |                  |           |
| 43 |                                                                                           |                  |           |
| 44 |                                                                                           |                  |           |
| 45 |                                                                                           |                  |           |
| 46 |                                                                                           |                  |           |
| 47 |                                                                                           |                  |           |
| 48 |                                                                                           |                  |           |
| 49 |                                                                                           |                  |           |
| 50 |                                                                                           |                  |           |
| 51 |                                                                                           |                  |           |
| 52 |                                                                                           |                  |           |
| 53 |                                                                                           |                  |           |
| 54 |                                                                                           |                  |           |
| 55 |                                                                                           |                  |           |
| 56 |                                                                                           |                  |           |
| 57 |                                                                                           |                  |           |
| 58 |                                                                                           |                  |           |
| 59 |                                                                                           |                  |           |
| 60 |                                                                                           |                  |           |

**Supplemental Table 5a. Sensitivity analysis of the association between physician sex and 30-day mortality and MACE in the overall cohort.**

| Physician Team                                                     | Mortality               |           | MACE                    |           |
|--------------------------------------------------------------------|-------------------------|-----------|-------------------------|-----------|
|                                                                    | Adjusted OR<br>(95% CI) | P-value   | Adjusted OR<br>(95% CI) | P-value   |
| <b>Model with physician sex as a 4-level categorical variable:</b> |                         |           |                         |           |
| Female surgeon + female<br>anaesthesiologist                       | Reference               | Reference | Reference               | Reference |
| Male surgeon + male<br>anaesthesiologist                           | 1.35 (0.77-2.37)        | 0.30      | 1.03 (0.72-1.47)        | 0.87      |
| Female surgeon + male<br>anaesthesiologist                         | 1.20 (0.69-2.10)        | 0.52      | 0.86 (0.61-1.22)        | 0.41      |
| Male surgeon + female<br>anaesthesiologist                         | 1.24 (0.69-2.20)        | 0.47      | 1.02 (0.71-1.46)        | 0.93      |
| <b>Model with surgeon sex only:</b>                                |                         |           |                         |           |
| Male surgeon                                                       | 1.15 (0.84-1.57)        | 0.38      | 1.16 (0.93-1.44)        | 0.19      |
| <b>Model with anaesthesiologist sex only:</b>                      |                         |           |                         |           |
| Male anaesthesiologist                                             | 1.10 (0.94-1.28)        | 0.23      | 1.00 (0.90-1.11)        | 0.97      |

Abbreviations: MACE = major adverse cardiovascular events

**Supplemental Table 5b. Sensitivity analysis of the association between physician sex and 30-day mortality and MACE in the CABG cohort.**

| Physician Team                                                     | Mortality               |           | MACE                    |           |
|--------------------------------------------------------------------|-------------------------|-----------|-------------------------|-----------|
|                                                                    | Adjusted OR<br>(95% CI) | P-value   | Adjusted OR<br>(95% CI) | P-value   |
| <b>Model with physician sex as a 4-level categorical variable:</b> |                         |           |                         |           |
| Female surgeon + female anaesthesiologist                          | Reference               | Reference | Reference               | Reference |
| Male surgeon + male anaesthesiologist                              | 1.31 (0.69-2.50)        | 0.41      | 0.92 (0.63-1.34)        | 0.66      |
| Female surgeon + male anaesthesiologist                            | 0.98 (0.50-1.91)        | 0.94      | 0.77 (0.52-1.13)        | 0.18      |
| Male surgeon + female anaesthesiologist                            | 1.20 (0.62-2.32)        | 0.59      | 0.96 (0.65-1.42)        | 0.84      |
| <b>Model with surgeon sex only:</b>                                |                         |           |                         |           |
| Male surgeon                                                       | 1.31 (0.94-1.18)        | 0.12      | 1.14 (0.91-1.44)        | 0.26      |
| <b>Model with anaesthesiologist sex only:</b>                      |                         |           |                         |           |
| Male anaesthesiologist                                             | 1.09 (0.90-1.31)        | 0.39      | 0.94 (0.83-1.06)        | 0.30      |

Abbreviations: MACE = major adverse cardiovascular events; CABG = coronary artery bypass grafting



**Supplemental Table 6a. Sensitivity analysis of the association between physician sex and lengths of stay in the CABG cohort.**

| Physician Team                                                     | ICU Length of Stay     |           | Hospital Length of Stay |           |
|--------------------------------------------------------------------|------------------------|-----------|-------------------------|-----------|
|                                                                    | Rate Ratio<br>(95% CI) | P-value   | Rate Ratio<br>(95% CI)  | P-value   |
| <b>Model with physician sex as a 4-level categorical variable:</b> |                        |           |                         |           |
| Female surgeon + female anaesthesiologist                          | Reference              | Reference | Reference               | Reference |
| Male surgeon + male anaesthesiologist                              | 1.05 (0.97-1.13)       | 0.21      | 1.07 (1.00-1.15)        | 0.049     |
| Female surgeon + male anaesthesiologist                            | 1.03 (0.98-1.08)       | 0.21      | 1.00 (0.97-1.03)        | 0.90      |
| Male surgeon + female anaesthesiologist                            | 1.05 (0.97-1.13)       | 0.25      | 1.06 (0.99-1.14)        | 0.09      |
| <b>Model with surgeon sex only:</b>                                |                        |           |                         |           |
| Male surgeon                                                       | 1.02 (0.96-1.09)       | 0.48      | 1.10 (1.03-1.18)        | 0.004     |
| <b>Model with anaesthesiologist sex only:</b>                      |                        |           |                         |           |
| Male anaesthesiologist                                             | 1.01 (0.98-1.03)       | 0.55      | 1.02 (1.00-1.04)        | 0.01      |

Abbreviations: ICU = intensive care unit; CABG = coronary artery bypass grafting

**Supplemental Table 6b. Sensitivity analysis of the association between physician sex and lengths of stay in the overall cohort.**

| Physician Team                                                     | ICU Length of Stay  |           | Hospital Length of Stay |           |
|--------------------------------------------------------------------|---------------------|-----------|-------------------------|-----------|
|                                                                    | Rate Ratio (95% CI) | P-value   | Rate Ratio (95% CI)     | P-value   |
| <b>Model with physician sex as a 4-level categorical variable:</b> |                     |           |                         |           |
| Female surgeon + female anaesthesiologist                          | Reference           | Reference | Reference               | Reference |
| Male surgeon + male anaesthesiologist                              | 1.07 (1.00-1.15)    | 0.06      | 1.07 (1.00-1.15)        | 0.06      |
| Female surgeon + male anaesthesiologist                            | 0.99 (0.97-1.02)    | 0.52      | 0.99 (0.97-1.02)        | 0.52      |
| Male surgeon + female anaesthesiologist                            | 1.06 (0.99-1.34)    | 0.12      | 1.06 (0.99-1.14)        | 0.12      |
| <b>Model with surgeon sex only:</b>                                |                     |           |                         |           |
| Male surgeon                                                       | 1.02 (0.96-1.09)    | 0.54      | 1.10 (1.03-1.17)        | 0.006     |
| <b>Model with anaesthesiologist sex only:</b>                      |                     |           |                         |           |
| Male anaesthesiologist                                             | 1.16 (0.99-1.04)    | 0.19      | 1.02 (1.00-1.03)        | 0.03      |

Abbreviations: ICU = intensive care unit

1  
2  
3  
4  
5  
6  
7  
8  
9  
10  
11  
12  
13  
14  
15  
16  
17  
18  
19  
20  
21  
22  
23  
24  
25  
26  
27  
28  
29  
30  
31  
32  
33  
34  
35  
36  
37  
38  
39  
40  
41  
42  
43  
44  
45  
46  
47  
48  
49  
50  
51  
52  
53  
54  
55  
56  
57  
58  
59  
60

**Supplemental Table 7. Post-hoc power analysis**

| <b>Power</b> | <b>N</b> | <b>Pcnt N<br/>X=1</b> | <b>P0</b> | <b>P1</b> | <b>Odds<br/>Ratio</b> | <b>R<br/>Squared</b> | <b>Alpha</b> | <b>Beta</b> |
|--------------|----------|-----------------------|-----------|-----------|-----------------------|----------------------|--------------|-------------|
| 0.19         | 79862    | 24.9                  | 0.02      | 0.02      | 0.93                  | 0.04                 | 0.05         | 0.81        |

N is the size of the sample drawn from the population.  
P0 is the response probability at the mean of X.  
P1 is the response probability when X is increased to one standard deviation above the mean.  
Alpha is the probability of rejecting a true null hypothesis.  
Beta is the probability of accepting a false null hypothesis.

For peer review only

STROBE Statement—Checklist of items that should be included in reports of *cohort studies*

|                              | Item No | Recommendation                                                                                                                                                                                                                                                                                                         | Page No |
|------------------------------|---------|------------------------------------------------------------------------------------------------------------------------------------------------------------------------------------------------------------------------------------------------------------------------------------------------------------------------|---------|
| <b>Title and abstract</b>    | 1       | (a) Indicate the study's design with a commonly used term in the title or the abstract<br>(b) Provide in the abstract an informative and balanced summary of what was done and what was found                                                                                                                          | 1-2     |
| <b>Introduction</b>          |         |                                                                                                                                                                                                                                                                                                                        |         |
| Background/rationale         | 2       | Explain the scientific background and rationale for the investigation being reported                                                                                                                                                                                                                                   | 4       |
| Objectives                   | 3       | State specific objectives, including any prespecified hypotheses                                                                                                                                                                                                                                                       | 4       |
| <b>Methods</b>               |         |                                                                                                                                                                                                                                                                                                                        |         |
| Study design                 | 4       | Present key elements of study design early in the paper                                                                                                                                                                                                                                                                | 5       |
| Setting                      | 5       | Describe the setting, locations, and relevant dates, including periods of recruitment, exposure, follow-up, and data collection                                                                                                                                                                                        | 5-6     |
| Participants                 | 6       | (a) Give the eligibility criteria, and the sources and methods of selection of participants. Describe methods of follow-up<br>(b) For matched studies, give matching criteria and number of exposed and unexposed                                                                                                      | 5       |
| Variables                    | 7       | Clearly define all outcomes, exposures, predictors, potential confounders, and effect modifiers. Give diagnostic criteria, if applicable                                                                                                                                                                               | 7       |
| Data sources/<br>measurement | 8*      | For each variable of interest, give sources of data and details of methods of assessment (measurement). Describe comparability of assessment methods if there is more than one group                                                                                                                                   | 6-7     |
| Bias                         | 9       | Describe any efforts to address potential sources of bias                                                                                                                                                                                                                                                              | 7-8     |
| Study size                   | 10      | Explain how the study size was arrived at                                                                                                                                                                                                                                                                              | 9       |
| Quantitative variables       | 11      | Explain how quantitative variables were handled in the analyses. If applicable, describe which groupings were chosen and why                                                                                                                                                                                           | 6-8     |
| Statistical methods          | 12      | (a) Describe all statistical methods, including those used to control for confounding<br>(b) Describe any methods used to examine subgroups and interactions<br>(c) Explain how missing data were addressed<br>(d) If applicable, explain how loss to follow-up was addressed<br>(e) Describe any sensitivity analyses | 7-9     |
| <b>Results</b>               |         |                                                                                                                                                                                                                                                                                                                        |         |
| Participants                 | 13*     | (a) Report numbers of individuals at each stage of study—eg numbers potentially eligible, examined for eligibility, confirmed eligible, included in the study, completing follow-up, and analysed<br>(b) Give reasons for non-participation at each stage<br>(c) Consider use of a flow diagram                        | 9       |
| Descriptive data             | 14*     | (a) Give characteristics of study participants (eg demographic, clinical, social) and information on exposures and potential confounders<br>(b) Indicate number of participants with missing data for each variable of interest<br>(c) Summarise follow-up time (eg, average and total amount)                         | 9       |
| Outcome data                 | 15*     | Report numbers of outcome events or summary measures over time                                                                                                                                                                                                                                                         | 9-11    |

|    |                          |                                                                                                                  |                                                                                                                                                                                                              |       |
|----|--------------------------|------------------------------------------------------------------------------------------------------------------|--------------------------------------------------------------------------------------------------------------------------------------------------------------------------------------------------------------|-------|
| 1  | Main results             | 16                                                                                                               | (a) Give unadjusted estimates and, if applicable, confounder-adjusted estimates and their precision (eg, 95% confidence interval). Make clear which confounders were adjusted for and why they were included | 9-11  |
| 2  |                          | (b) Report category boundaries when continuous variables were categorized                                        |                                                                                                                                                                                                              |       |
| 3  |                          | (c) If relevant, consider translating estimates of relative risk into absolute risk for a meaningful time period |                                                                                                                                                                                                              |       |
| 4  | Other analyses           | 17                                                                                                               | Report other analyses done—eg analyses of subgroups and interactions, and sensitivity analyses                                                                                                               | 11    |
| 5  | <b>Discussion</b>        |                                                                                                                  |                                                                                                                                                                                                              |       |
| 6  | Key results              | 18                                                                                                               | Summarise key results with reference to study objectives                                                                                                                                                     | 12    |
| 7  | Limitations              | 19                                                                                                               | Discuss limitations of the study, taking into account sources of potential bias or imprecision. Discuss both direction and magnitude of any potential bias                                                   | 14    |
| 8  | Interpretation           | 20                                                                                                               | Give a cautious overall interpretation of results considering objectives, limitations, multiplicity of analyses, results from similar studies, and other relevant evidence                                   | 12-14 |
| 9  | Generalisability         | 21                                                                                                               | Discuss the generalisability (external validity) of the study results                                                                                                                                        | 14    |
| 10 | <b>Other information</b> |                                                                                                                  |                                                                                                                                                                                                              |       |
| 11 | Funding                  | 22                                                                                                               | Give the source of funding and the role of the funders for the present study and, if applicable, for the original study on which the present article is based                                                | 16    |

\*Give information separately for exposed and unexposed groups.

**Note:** An Explanation and Elaboration article discusses each checklist item and gives methodological background and published examples of transparent reporting. The STROBE checklist is best used in conjunction with this article (freely available on the Web sites of PLoS Medicine at <http://www.plosmedicine.org/>, Annals of Internal Medicine at <http://www.annals.org/>, and Epidemiology at <http://www.epidem.com/>). Information on the STROBE Initiative is available at <http://www.strobe-statement.org>.
