# Supplementary material for: Impact of surgeon and anaesthesiologist sex on patient outcomes after cardiac surgery: a population-based study
Source: PubMed Central journal article supplement — BMJ Open. 2021 Aug 25;11(8):e051192. doi: 10.1136/bmjopen-2021-051192 (PMC8388286; doi:10.1136/bmjopen-2021-051192), 2021-08-25
Supplement: bmjopen-2021-051192supp002.pdf [file bmjopen-2021-051192supp002.pdf]

**Supplemental Table 1. Thirty-day outcomes in patients who underwent CABG, by physician sex discordance.**

| <b>Variable</b>                             | <b>Discordant<br/>(n=19,893)</b> | <b>Concordant<br/>(n=59,969)</b> | <b>Standardized Difference</b> | <b>P-value</b> |
|---------------------------------------------|----------------------------------|----------------------------------|--------------------------------|----------------|
| Mortality, n (%)                            | 205 (1.3)                        | 654 (1.4)                        | 0.01                           | 0.41           |
| MACE, n (%)                                 | 524 (3.3)                        | 1,692 (3.6)                      | 0.01                           | 0.12           |
| Hospital length of stay, median (IQR), days | 7 (6-9)                          | 7 (6-9)                          | 0.03                           | 0.007          |
| ICU length of stay, median (IQR), days      | 2 (2-3)                          | 2 (2-3)                          | 0.07                           | <0.001         |

Abbreviations: MACE = major adverse cardiovascular events; ICU = intensive care unit, IQR = interquartile range

**Supplemental Table 2. Adjusted associations between surgeon-anaesthesiologist sex discordance and CABG outcomes at 30 days.**

| <b>Outcome</b>          | <b>Adjusted measure (95% CI)</b> | <b>P-value</b> |
|-------------------------|----------------------------------|----------------|
| Mortality               | OR: 0.88 (0.74-1.05)             | 0.16           |
| MACE                    | OR: 0.99 (0.98-1.11)             | 0.40           |
| Hospital length of stay | RR: 1.00 (0.99-1.02)             | 0.70           |
| ICU length of stay      | RR: 0.99 (0.98-1.00)             | 0.09           |

Abbreviations: MACE = major adverse cardiovascular events; ICU = intensive care unit; OR = odds ratio; RR = risk ratio; CI = confidence interval

**Supplemental Table 3. Predictors of major adverse cardiovascular events at 30 days in the overall cohort, by surgeon-anaesthesiologist sex discordance.**

| Variable                                | Adjusted OR (95% CI) | P-value   |
|-----------------------------------------|----------------------|-----------|
| Physician characteristics               |                      |           |
| Physician sex discordance               | 0.96 (0.87-1.06)     | 0.40      |
| Surgeon experience, yr                  |                      |           |
| <10                                     | Reference            | Reference |
| 11-20                                   | 0.91 (0.76-1.10)     | 0.33      |
| 21-30                                   | 0.97 (0.77-1.22)     | 0.79      |
| >30                                     | 1.04 (0.78-1.37)     | 0.80      |
| Surgeon volume, per 100 cases           | 1.00 (1.00-1.01)     | 0.71      |
| Anaesthesiologist volume, per 100 cases | 1.00 (0.99-1.01)     | 0.74      |
| Anaesthesiologist experience, yr        |                      |           |
| <10                                     | Reference            | Reference |
| 11-20                                   | 1.12 (0.97-1.31)     | 0.13      |
| 21-30                                   | 1.13 (0.95-1.33)     | 0.17      |
| >30                                     | 1.06 (0.87-1.28)     | 0.57      |
| Patient characteristics                 |                      |           |
| Patient age, per 10 yr                  | 1.30 (1.25-1.36)     | <0.001    |
| Female patient sex                      | 1.45 (1.33-1.58)     | <0.001    |
| Income quintile                         |                      |           |
| 1                                       | 1.07 (0.95-1.21)     | 0.27      |
| 2                                       | 1.15 (1.02-1.30)     | 0.02      |
| 3                                       | 1.04 (0.92-1.17)     | 0.58      |
| 4                                       | 1.01 (0.89-1.14)     | 0.89      |
| 5                                       | Reference            | Reference |
| Rural residence                         | 0.99 (0.89-1.10)     | 0.83      |
| Community hospital                      | 0.79 (0.61-1.02)     | 0.08      |
| Hypertension                            | 1.12(0.97-1.28)      | 0.12      |
| Atrial fibrillation                     | 1.18 (1.04-1.34)     | 0.00      |
| Recent MI within 30 days                | 1.98 (1.80-2.18)     | <0.001    |
| Remote MI                               | 1.47 (1.32-1.63)     | <0.001    |
| Previous PCI                            | 0.93 (0.83-1.03)     | 0.16      |
| Left ventricular ejection fraction      |                      |           |
| ≥ 50                                    | Reference            | Reference |
| 35-49                                   | 1.08 (0.98-1.19)     | 0.11      |
| 20-35                                   | 1.18 (1.04-1.34)     | 0.01      |
| < 20                                    | 1.10 (0.84-1.44)     | 0.49      |
| Heart failure                           | 1.42 (1.30-1.55)     | <0.001    |
| Peripheral arterial disease             | 1.32 (1.20-1.47)     | <0.001    |

|                                        |                  |           |
|----------------------------------------|------------------|-----------|
| Cerebrovascular disease                | 1.36 (1.22-1.51) | <0.001    |
| Dementia                               | 1.05 (0.59-1.89) | 0.86      |
| Depression                             | 1.20 (0.93-1.55) | 0.16      |
| Psychosis                              | 0.87 (0.40-1.88) | 0.72      |
| Smoking status                         |                  |           |
| Never                                  | Reference        | Reference |
| Current                                | 1.05 (0.93-1.17) | 0.43      |
| Former                                 | 1.02 (0.93-1.11) | 0.73      |
| Chronic obstructive pulmonary disease  | 1.04 (0.95-1.12) | 0.41      |
| Pulmonary circulatory disorder         | 1.22 (0.99-1.51) | 0.06      |
| Serum creatinine ( $\mu\text{mol/L}$ ) |                  |           |
| <120                                   | Reference        | Reference |
| 120-179                                | 1.16 (1.03-1.30) | 0.01      |
| $\geq 180$                             | 1.23 (1.01-1.49) | 0.04      |
| Dialysis                               | 1.21 (0.95-1.55) | 0.12      |
| Diabetes                               | 1.02 (0.94-1.10) | 0.65      |
| Hypothyroidism                         | 0.95 (0.75-1.21) | 0.67      |
| Morbid obesity                         | 1.12 (1.03-1.22) | 0.01      |
| Primary cancer                         | 0.93 (0.79-1.10) | 0.40      |
| Metastatic cancer                      | 1.02 (0.94-1.10) | 0.95      |
| Anemia                                 | 1.23 (1.10-1.37) | 0.0002    |
| Venous thromboembolism                 | 0.64 (0.35-1.17) | 0.15      |
| Liver disease                          | 1.00 (0.69-1.44) | 0.10      |
| Alcohol abuse                          | 1.28 (0.97-1.68) | 0.08      |
| Frailty                                | 1.07 (0.97-1.18) | 0.17      |
| Redo sternotomy                        | 1.44 (1.19-1.73) | 0.0001    |
| Emergent surgery                       | 1.68 (1.48-1.90) | <0.001    |
| Complex surgery                        | 1.17 (1.04-1.32) | 0.01      |
| Surgery duration, per 10 min           | 1.02 (1.01-1.02) | <0.001    |

Abbreviations: MI = myocardial infarction; PCI = percutaneous coronary intervention

Total case volumes reflect the number of cases performed since 1991 until the date of the index procedure.

**Supplemental Table 4a. Predictors of intensive care unit length of stay in the overall cohort, by surgeon-anaesthesiologist sex discordance.**

| Variable                                | Rate Ratio (95% CI) | P-value   |
|-----------------------------------------|---------------------|-----------|
| Physician characteristics               |                     |           |
| Physician sex discordance               | 0.99 (0.98-1.01)    | 0.52      |
| Surgeon experience, yr                  |                     |           |
| <10                                     | Reference           | Reference |
| 11-20                                   | 0.99 (0.97-1.02)    | 0.65      |
| 21-30                                   | 1.02 (0.99-1.06)    | 0.14      |
| >30                                     | 1.02 (0.98-1.06)    | 0.24      |
| Surgeon volume, per 100 cases           | 1.00 (1.00-1.00)    | 0.33      |
| Anaesthesiologist experience, yr        |                     |           |
| 0-10                                    | Reference           | Reference |
| 11-20                                   | 0.98 (0.96-1.00)    | 0.04      |
| 21-30                                   | 0.99 (0.97-1.02)    | 0.51      |
| >30                                     | 1.00 (0.97-1.03)    | 0.89      |
| Anaesthesiologist volume, per 100 cases | 1.00 (1.00-1.00)    | 0.71      |
| Surgery duration                        | 1.02 (1.02-1.02)    | <0.001    |
| Patient characteristics                 |                     |           |
| Patient age, yr                         | 1.09 (1.08-1.09)    | <0.001    |
| Female patient sex                      | 1.07 (1.06-1.08)    | <0.001    |
| Income quintile                         |                     |           |
| 1                                       | 1.05 (1.04-1.07)    | <0.001    |
| 2                                       | 1.03 (1.02-1.04)    | <0.001    |
| 3                                       | 1.03 (1.02-1.04)    | <0.001    |
| 4                                       | 1.01 (1.00-1.02)    | 0.17      |
| 5                                       | Reference           | Reference |
| Rural residence                         | 0.98 (0.97-0.99)    | 0.00      |
| Community hospital                      | 0.98 (0.86-1.13)    | 0.82      |
| Hypertension                            | 0.96 (0.95-0.97)    | <0.001    |
| Atrial fibrillation                     | 1.06 (1.04-1.07)    | <0.001    |
| Recent MI within 30 days                | 1.02 (1.01-1.03)    | 0.00      |
| Remote MI                               | 1.00 (0.99-1.01)    | 0.69      |

|                                       |                  |           |
|---------------------------------------|------------------|-----------|
| Previous PCI                          | 1.00 (0.99-1.01) | 0.70      |
| Left ventricular ejection fraction    |                  |           |
| ≥ 50%                                 | Reference        | Reference |
| 35-49%                                | 1.03 (1.02-1.04) | <0.001    |
| 20-35%                                | 1.11 (1.10-1.13) | <0.001    |
| < 20%                                 | 1.21 (1.18-1.24) | <0.001    |
| Heart failure                         | 1.21 (1.20-1.22) | <0.001    |
| Peripheral arterial disease           | 1.05 (1.04-1.06) | <0.001    |
| Cerebrovascular disease               | 1.04 (1.03-1.05) | <0.001    |
| Dementia                              | 1.02 (0.95-1.09) | 0.54      |
| Depression                            | 1.18 (1.15-1.22) | <0.001    |
| Psychosis                             | 1.03 (0.96-1.11) | 0.39      |
| Smoking status                        |                  |           |
| Never                                 | Reference        | Reference |
| Current                               | 1.02 (1.01-1.03) | <0.001    |
| Former                                | 1.00 (0.99-1.01) | 1.00      |
| Chronic obstructive pulmonary disease | 1.05 (1.04-1.06) | <0.001    |
| Pulmonary circulatory disorder        | 1.23 (1.21-1.26) | <0.001    |
| Serum creatinine (μmol/L)             |                  |           |
| <120                                  | Reference        | Reference |
| 120-179                               | 1.16 (1.15-1.18) | <0.001    |
| ≥180                                  | 1.33 (1.31-1.36) | <0.001    |
| Dialysis                              | 1.06 (1.04-1.09) | <0.001    |
| Diabetes                              | 1.03 (1.02-1.03) | <0.001    |
| Hypothyroidism                        | 1.01 (0.98-1.03) | 0.60      |
| Morbid obesity                        | 0.99 (0.98-1.00) | 0.02      |
| Primary cancer                        | 1.00 (0.99-1.02) | 0.72      |
| Metastatic cancer                     | 0.99 (0.94-1.04) | 0.62      |
| Anemia                                | 1.15 (1.14-1.16) | <0.001    |
| Venous thromboembolism                | 0.94 (0.89-0.99) | 0.02      |
| Liver disease                         | 1.09 (1.05-1.12) | <0.001    |
| Alcohol abuse                         | 1.10 (1.07-1.14) | <0.001    |
| Frailty                               | 1.09 (1.08-1.10) | <0.001    |
| Complex surgery                       | 1.15 (1.14-1.17) | <0.001    |

---

|                  |                  |        |
|------------------|------------------|--------|
| Redo sternotomy  | 0.97 (0.95-0.99) | 0.00   |
| Emergent surgery | 1.46 (1.44-1.48) | <0.001 |

---

Abbreviations: MI = myocardial infarction; PCI = percutaneous coronary intervention  
Total case volumes reflect the number of cases performed since 1991 until the date of the index procedure.

**Supplemental Table 4b. Predictors of hospital length of stay in the overall cohort, by surgeon-anaesthesiologist sex discordance.**

| Variable                                  | Rate Ratio (95% CI)     | P-value          |
|-------------------------------------------|-------------------------|------------------|
| <b>Physician characteristics</b>          |                         |                  |
| Physician sex discordance                 | 0.99 (0.98-1.00)        | 0.03             |
| <b>Surgeon experience, yr</b>             |                         |                  |
| <10                                       | Reference               | Reference        |
| 11-20                                     | 0.99 (0.98-1.01)        | 0.35             |
| 21-30                                     | 1.01 (0.99-1.03)        | 0.41             |
| >30                                       | 1.01 (0.98-1.03)        | 0.65             |
| Surgeon volume, per 100 cases             | 1.00 (1.00-1.00)        | <.0001           |
| <b>Anaesthesiologist experience, yr</b>   |                         |                  |
| 0-10                                      | Reference               | Reference        |
| 11-20                                     | 0.99 (0.98-1.00)        | 0.03             |
| 21-30                                     | 0.98 (0.97-1.00)        | 0.03             |
| >30                                       | 0.97 (0.96-0.99)        | 0.00             |
| Anaesthesiologist volume, per 100 cases   | 1.00 (1.00-1.00)        | 0.01             |
| <b>Surgery duration</b>                   | <b>1.01 (1.01-1.01)</b> | <b>&lt;.0001</b> |
| <b>Patient characteristics</b>            |                         |                  |
| Patient age, yr                           | 1.11 (1.10-1.11)        | <.0001           |
| Female patient sex                        | 1.11 (1.10-1.12)        | <.0001           |
| <b>Income quintile</b>                    |                         |                  |
| 1                                         | 1.07 (1.06-1.08)        | <.0001           |
| 2                                         | 1.04 (1.03-1.04)        | <.0001           |
| 3                                         | 1.03 (1.02-1.03)        | <.0001           |
| 4                                         | 1.01 (1.01-1.02)        | 0.0002           |
| 5                                         | Reference               | Reference        |
| Rural residence                           | 1.00 (0.99-1.00)        | 0.15             |
| Community hospital                        | 1.02 (0.92-1.12)        | 0.71             |
| Hypertension                              | 0.98 (0.97-0.99)        | <.0001           |
| Atrial fibrillation                       | 1.06 (1.05-1.07)        | <.0001           |
| Recent MI within 30 days                  | 1.02 (1.02-1.03)        | <.0001           |
| Remote MI                                 | 1.00 (0.99-1.01)        | 0.80             |
| Previous PCI                              | 0.97 (0.97-0.98)        | <.0001           |
| <b>Left ventricular ejection fraction</b> |                         |                  |
| ≥ 50%                                     | Reference               | Reference        |
| 35-49%                                    | 1.02 (1.01-1.03)        | <.0001           |
| 20-35%                                    | 1.06 (1.05-1.06)        | <.0001           |
| < 20%                                     | 1.10 (1.08-1.12)        | <.0001           |
| Heart failure                             | 1.17 (1.16-1.18)        | <.0001           |
| Peripheral arterial disease               | 1.04 (1.04-1.05)        | <.0001           |
| Cerebrovascular disease                   | 1.06 (1.05-1.07)        | <.0001           |
| Dementia                                  | 1.03 (0.99-1.08)        | 0.10             |



|                                       |                  |           |
|---------------------------------------|------------------|-----------|
| Depression                            | 1.19 (1.17-1.21) | <.0001    |
| Psychosis                             | 1.22 (1.17-1.27) | <.0001    |
| Smoking status                        |                  |           |
| Never                                 | Reference        | Reference |
| Current                               | 1.00 (0.99-1.00) | 0.20      |
| Former                                | 1.00 (0.99-1.00) | 0.63      |
| Chronic obstructive pulmonary disease | 1.06 (1.05-1.06) | <.0001    |
| Pulmonary circulatory disorder        | 1.14 (1.13-1.16) | <.0001    |
| Serum creatinine (µmol/L)             |                  |           |
| <120                                  | Reference        | Reference |
| 120-179                               | 1.10 (1.09-1.11) | <.0001    |
| ≥180                                  | 1.25 (1.23-1.27) | <.0001    |
| Dialysis                              | 1.11 (1.09-1.13) | <.0001    |
| Diabetes                              | 1.03 (1.03-1.04) | <.0001    |
| Hypothyroidism                        | 1.01 (1.00-1.03) | 0.13      |
| Morbid obesity                        | 1.00 (0.99-1.00) | 0.29      |
| Primary cancer                        | 1.02 (1.01-1.03) | 0.0003    |
| Metastatic cancer                     | 1.00 (0.97-1.04) | 0.83      |
| Anemia                                | 1.14 (1.13-1.15) | <.0001    |
| Venous thromboembolism                | 1.01 (0.98-1.04) | 0.60      |
| Liver disease                         | 1.06 (1.04-1.09) | <.0001    |
| Alcohol abuse                         | 1.07 (1.05-1.09) | <.0001    |
| Frailty                               | 1.15 (1.14-1.16) | <.0001    |
| Complex surgery                       | 1.13 (1.12-1.13) | <.0001    |
| Redo sternotomy                       | 0.95 (0.94-0.96) | <.0001    |
| Emergent surgery                      | 1.22 (1.21-1.24) | <.0001    |

Abbreviations: MI = myocardial infarction; PCI = percutaneous coronary intervention  
 Total case volumes reflect the number of cases performed since 1991 until the date of the index procedure.

**Supplemental Table 5a. Sensitivity analysis of the association between physician sex and 30-day mortality and MACE in the overall cohort.**

| Physician Team                                                     | Mortality               |           | MACE                    |           |
|--------------------------------------------------------------------|-------------------------|-----------|-------------------------|-----------|
|                                                                    | Adjusted OR<br>(95% CI) | P-value   | Adjusted OR<br>(95% CI) | P-value   |
| <b>Model with physician sex as a 4-level categorical variable:</b> |                         |           |                         |           |
| Female surgeon + female anaesthesiologist                          | Reference               | Reference | Reference               | Reference |
| Male surgeon + male anaesthesiologist                              | 1.35 (0.77-2.37)        | 0.30      | 1.03 (0.72-1.47)        | 0.87      |
| Female surgeon + male anaesthesiologist                            | 1.20 (0.69-2.10)        | 0.52      | 0.86 (0.61-1.22)        | 0.41      |
| Male surgeon + female anaesthesiologist                            | 1.24 (0.69-2.20)        | 0.47      | 1.02 (0.71-1.46)        | 0.93      |
| <b>Model with surgeon sex only:</b>                                |                         |           |                         |           |
| Male surgeon                                                       | 1.15 (0.84-1.57)        | 0.38      | 1.16 (0.93-1.44)        | 0.19      |
| <b>Model with anaesthesiologist sex only:</b>                      |                         |           |                         |           |
| Male anaesthesiologist                                             | 1.10 (0.94-1.28)        | 0.23      | 1.00 (0.90-1.11)        | 0.97      |

Abbreviations: MACE = major adverse cardiovascular events

**Supplemental Table 5b. Sensitivity analysis of the association between physician sex and 30-day mortality and MACE in the CABG cohort.**

| Physician Team                                                     | Mortality               |           | MACE                    |           |
|--------------------------------------------------------------------|-------------------------|-----------|-------------------------|-----------|
|                                                                    | Adjusted OR<br>(95% CI) | P-value   | Adjusted OR<br>(95% CI) | P-value   |
| <b>Model with physician sex as a 4-level categorical variable:</b> |                         |           |                         |           |
| Female surgeon + female anaesthesiologist                          | Reference               | Reference | Reference               | Reference |
| Male surgeon + male anaesthesiologist                              | 1.31 (0.69-2.50)        | 0.41      | 0.92 (0.63-1.34)        | 0.66      |
| Female surgeon + male anaesthesiologist                            | 0.98 (0.50-1.91)        | 0.94      | 0.77 (0.52-1.13)        | 0.18      |
| Male surgeon + female anaesthesiologist                            | 1.20 (0.62-2.32)        | 0.59      | 0.96 (0.65-1.42)        | 0.84      |
| <b>Model with surgeon sex only:</b>                                |                         |           |                         |           |
| Male surgeon                                                       | 1.31 (0.94-1.18)        | 0.12      | 1.14 (0.91-1.44)        | 0.26      |
| <b>Model with anaesthesiologist sex only:</b>                      |                         |           |                         |           |
| Male anaesthesiologist                                             | 1.09 (0.90-1.31)        | 0.39      | 0.94 (0.83-1.06)        | 0.30      |

Abbreviations: MACE = major adverse cardiovascular events; CABG = coronary artery bypass grafting

**Supplemental Table 6a. Sensitivity analysis of the association between physician sex and lengths of stay in the CABG cohort.**

| Physician Team                                                     | ICU Length of Stay     |           | Hospital Length of Stay |           |
|--------------------------------------------------------------------|------------------------|-----------|-------------------------|-----------|
|                                                                    | Rate Ratio<br>(95% CI) | P-value   | Rate Ratio<br>(95% CI)  | P-value   |
| <b>Model with physician sex as a 4-level categorical variable:</b> |                        |           |                         |           |
| Female surgeon + female anaesthesiologist                          | Reference              | Reference | Reference               | Reference |
| Male surgeon + male anaesthesiologist                              | 1.05 (0.97-1.13)       | 0.21      | 1.07 (1.00-1.15)        | 0.049     |
| Female surgeon + male anaesthesiologist                            | 1.03 (0.98-1.08)       | 0.21      | 1.00 (0.97-1.03)        | 0.90      |
| Male surgeon + female anaesthesiologist                            | 1.05 (0.97-1.13)       | 0.25      | 1.06 (0.99-1.14)        | 0.09      |
| <b>Model with surgeon sex only:</b>                                |                        |           |                         |           |
| Male surgeon                                                       | 1.02 (0.96-1.09)       | 0.48      | 1.10 (1.03-1.18)        | 0.004     |
| <b>Model with anaesthesiologist sex only:</b>                      |                        |           |                         |           |
| Male anaesthesiologist                                             | 1.01 (0.98-1.03)       | 0.55      | 1.02 (1.00-1.04)        | 0.01      |

Abbreviations: ICU = intensive care unit; CABG = coronary artery bypass grafting

**Supplemental Table 6b. Sensitivity analysis of the association between physician sex and lengths of stay in the overall cohort.**

| Physician Team                                                     | ICU Length of Stay     |           | Hospital Length of Stay |           |
|--------------------------------------------------------------------|------------------------|-----------|-------------------------|-----------|
|                                                                    | Rate Ratio<br>(95% CI) | P-value   | Rate Ratio<br>(95% CI)  | P-value   |
| <b>Model with physician sex as a 4-level categorical variable:</b> |                        |           |                         |           |
| Female surgeon + female anaesthesiologist                          | Reference              | Reference | Reference               | Reference |
| Male surgeon + male anaesthesiologist                              | 1.07 (1.00-1.15)       | 0.06      | 1.07 (1.00-1.15)        | 0.06      |
| Female surgeon + male anaesthesiologist                            | 0.99 (0.97-1.02)       | 0.52      | 0.99 (0.97-1.02)        | 0.52      |
| Male surgeon + female anaesthesiologist                            | 1.06 (0.99-1.34)       | 0.12      | 1.06 (0.99-1.14)        | 0.12      |
| <b>Model with surgeon sex only:</b>                                |                        |           |                         |           |
| Male surgeon                                                       | 1.02 (0.96-1.09)       | 0.54      | 1.10 (1.03-1.17)        | 0.006     |
| <b>Model with anaesthesiologist sex only:</b>                      |                        |           |                         |           |
| Male anaesthesiologist                                             | 1.16 (0.99-1.04)       | 0.19      | 1.02 (1.00-1.03)        | 0.03      |

Abbreviations: ICU = intensive care unit

**Supplemental Table 7. Post-hoc power analysis**

| <b>Power</b> | <b>N</b> | <b>Pcnt N<br/>X=1</b> | <b>P0</b> | <b>P1</b> | <b>Odds<br/>Ratio</b> | <b>R<br/>Squared</b> | <b>Alpha</b> | <b>Beta</b> |
|--------------|----------|-----------------------|-----------|-----------|-----------------------|----------------------|--------------|-------------|
| 0.19         | 79862    | 24.9                  | 0.02      | 0.02      | 0.93                  | 0.04                 | 0.05         | 0.81        |

N is the size of the sample drawn from the population.

P0 is the response probability at the mean of X.

P1 is the response probability when X is increased to one standard deviation above the mean.

Alpha is the probability of rejecting a true null hypothesis.

Beta is the probability of accepting a false null hypothesis.
