# Supplementary figures and images for: Impact of surgeon and anaesthesiologist sex on patient outcomes after cardiac surgery: a population-based study
Source: PubMed Central journal article supplement — BMJ Open. 2021 Aug 25;11(8):e051192. doi: 10.1136/bmjopen-2021-051192 (PMC8388286; doi:10.1136/bmjopen-2021-051192), 2021-08-25

**Supplemental Figure 1. Cohort flow diagram**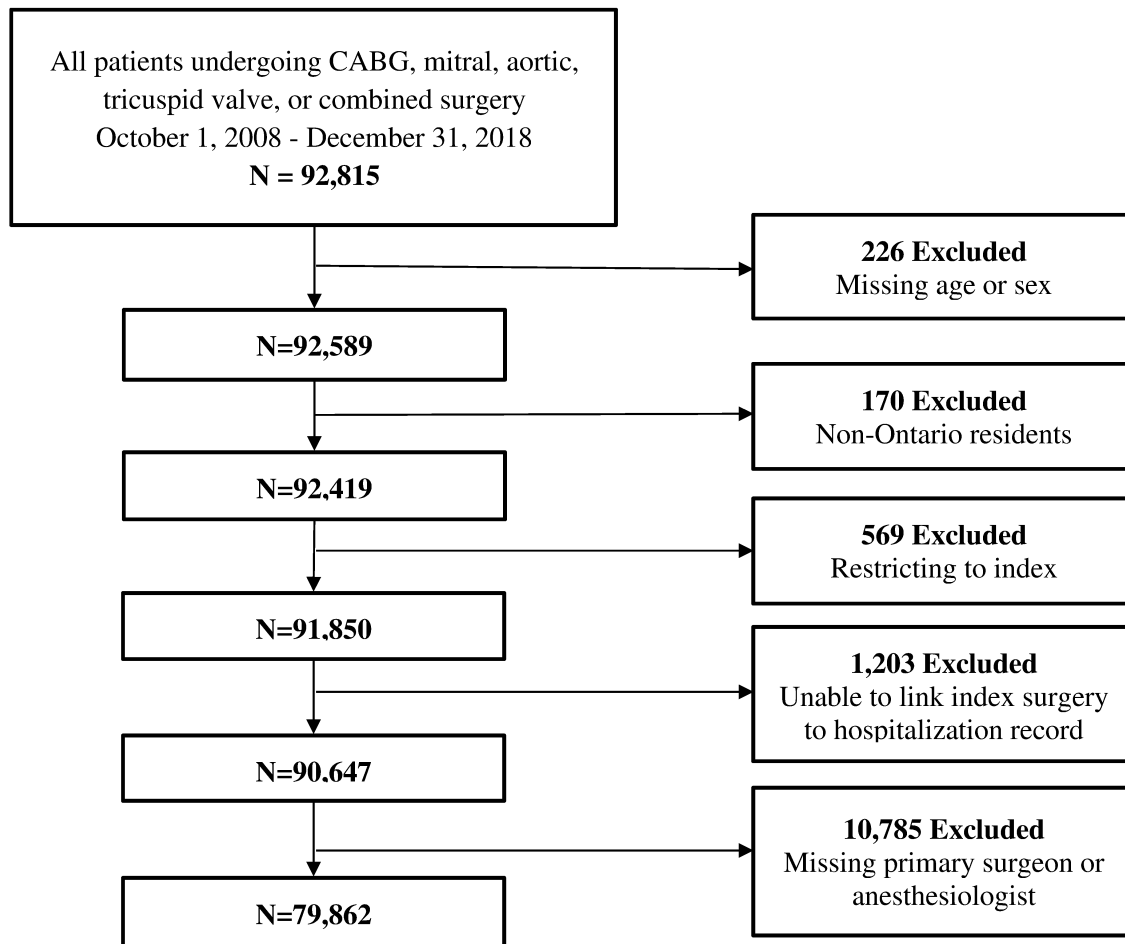

Abbreviation: CABG = coronary artery bypass surgery

Supplement: bmjopen-2021-051192supp001.pdf [file bmjopen-2021-051192supp001.pdf]
